# Supplementary material for: Clinical and Functional Characterization of the Recurrent TUBA1A p.(Arg2His) Mutation
Source: Brain Sci. 2018 Aug 7;8(8):145. doi: 10.3390/brainsci8080145 (PMC6119949; doi:10.3390/brainsci8080145)
Supplement: Supplementary file 1 [file brainsci-08-00145-s001.zip › Supplementary File 2.xlsx]

## Sheet: Table S2
Table S2. The substitution probabilities for 4,548 possible substitutions in the TUBA1A gene based on heptanucleotide sequence context.
		Heptanucleotide						Substitution probabilities from reference to mutant
		Context (-1 strand)		Allele				[from Aggarwala & Voight 2016]
gDNA (hg19)	REGION	Reference	Mutant	Reference	Mutant	cDNA	Protein	African	Asian	European	Mean	RANK
chr12:g.49582782C>T	5'UTR	TCGGCAG	TCGACAG	G	A	NM_006009.3:c.-20G>A	p.(=)	0.00422136	0.00247104	0.00350064	0.00339768	1087
chr12:g.49582782C>G	5'UTR	TCGGCAG	TCGCCAG	G	C	NM_006009.3:c.-20G>C	p.(=)	0.00108108	0.000514801	0.00046332	0.000686401	3855
chr12:g.49582782C>A	5'UTR	TCGGCAG	TCGTCAG	G	T	NM_006009.3:c.-20G>T	p.(=)	0.00221364	0.000978121	0.00144144	0.0015444	2184
chr12:g.49582781G>T	5'UTR	CGGCAGT	CGGAAGT	C	A	NM_006009.3:c.-19C>A	p.(=)	0.00173321	0.000804704	0.000866605	0.00113484	2767
chr12:g.49582781G>C	5'UTR	CGGCAGT	CGGGAGT	C	G	NM_006009.3:c.-19C>G	p.(=)	0.00136181	0.00123801	0.00111421	0.00123801	2580
chr12:g.49582781G>A	5'UTR	CGGCAGT	CGGTAGT	C	T	NM_006009.3:c.-19C>T	p.(=)	0.00519963	0.00315692	0.00346642	0.00394099	818
chr12:g.49582780T>G	5'UTR	GGCAGTC	GGCCGTC	A	C	NM_006009.3:c.-18A>C	p.(=)	0.00184692	0.000942306	0.000929742	0.00123966	2576
chr12:g.49582780T>C	5'UTR	GGCAGTC	GGCGGTC	A	G	NM_006009.3:c.-18A>G	p.(=)	0.00380692	0.00221128	0.00273897	0.00291905	1341
chr12:g.49582780T>A	5'UTR	GGCAGTC	GGCTGTC	A	T	NM_006009.3:c.-18A>T	p.(=)	0.00155795	0.000778973	0.00103025	0.00112239	2785
chr12:g.49582779C>T	5'UTR	GCAGTCG	GCAATCG	G	A	NM_006009.3:c.-17G>A	p.(=)	0.00683829	0.00418343	0.00498793	0.00533655	409
chr12:g.49582779C>G	5'UTR	GCAGTCG	GCACTCG	G	C	NM_006009.3:c.-17G>C	p.(=)	0.00112631	0.000724055	0.000724055	0.000858139	3381
chr12:g.49582779C>A	5'UTR	GCAGTCG	GCATTCG	G	T	NM_006009.3:c.-17G>T	p.(=)	0.00185036	0.000724055	0.00112631	0.00123357	2591
chr12:g.49582778A>T	5'UTR	CAGTCGC	CAGACGC	T	A	NM_006009.3:c.-16T>A	p.(=)	0.000900975	0.00024572	0.000655254	0.00060065	4121
chr12:g.49582778A>G	5'UTR	CAGTCGC	CAGCCGC	T	C	NM_006009.3:c.-16T>C	p.(=)	0.00393153	0.00278483	0.00286674	0.00319436	1183
chr12:g.49582778A>C	5'UTR	CAGTCGC	CAGGCGC	T	G	NM_006009.3:c.-16T>G	p.(=)	0.00229339	0.00180195	0.00212958	0.00207497	1730
chr12:g.49582777G>T	5'UTR	AGTCGCG	AGTAGCG	C	A	NM_006009.3:c.-15C>A	p.(=)	0.0052356	0.00190386	0.00285578	0.00333175	1117
chr12:g.49582777G>C	5'UTR	AGTCGCG	AGTGGCG	C	G	NM_006009.3:c.-15C>G	p.(=)	0.00428367	0.00333175	0.00333175	0.00364906	947
chr12:g.49582777G>A	5'UTR	AGTCGCG	AGTTGCG	C	T	NM_006009.3:c.-15C>T	p.(=)	0.0504522	0.0214184	0.0333175	0.0350627	70
chr12:g.49582776C>T	5'UTR	GTCGCGA	GTCACGA	G	A	NM_006009.3:c.-14G>A	p.(=)	0.0830912	0.0453225	0.0517141	0.0600426	39
chr12:g.49582776C>G	5'UTR	GTCGCGA	GTCCCGA	G	C	NM_006009.3:c.-14G>C	p.(=)	0.0040674	0.00522952	0.00348635	0.00426109	708
chr12:g.49582776C>A	5'UTR	GTCGCGA	GTCTCGA	G	T	NM_006009.3:c.-14G>T	p.(=)	0.0110401	0.00871586	0.00871586	0.00949061	99
chr12:g.49582775G>T	5'UTR	TCGCGAA	TCGAGAA	C	A	NM_006009.3:c.-13C>A	p.(=)	0.00841751	0.00448934	0.00505051	0.00598578	269
chr12:g.49582775G>C	5'UTR	TCGCGAA	TCGGGAA	C	G	NM_006009.3:c.-13C>G	p.(=)	0.00505051	0.00392817	0.00561167	0.00486345	524
chr12:g.49582775G>A	5'UTR	TCGCGAA	TCGTGAA	C	T	NM_006009.3:c.-13C>T	p.(=)	0.0925926	0.0549944	0.0673401	0.0716423	14
chr12:g.49582774C>T	5'UTR	CGCGAAG	CGCAAAG	G	A	NM_006009.3:c.-12G>A	p.(=)	0.0577889	0.0273241	0.0376884	0.0409338	67
chr12:g.49582774C>G	5'UTR	CGCGAAG	CGCCAAG	G	C	NM_006009.3:c.-12G>C	p.(=)	0.00376884	0.0031407	0.00439698	0.00376884	892
chr12:g.49582774C>A	5'UTR	CGCGAAG	CGCTAAG	G	T	NM_006009.3:c.-12G>T	p.(=)	0.00502513	0.00376884	0.00345477	0.00408291	766
chr12:g.49582773T>G	5'UTR	GCGAAGC	GCGCAGC	A	C	NM_006009.3:c.-11A>C	p.(=)	0.000783699	0.000195925	0.000587774	0.000522466	4299
chr12:g.49582773T>C	5'UTR	GCGAAGC	GCGGAGC	A	G	NM_006009.3:c.-11A>G	p.(=)	0.00382053	0.00274295	0.00333072	0.00329807	1129
chr12:g.49582773T>A	5'UTR	GCGAAGC	GCGTAGC	A	T	NM_006009.3:c.-11A>T	p.(=)	0.000587774	0.000685737	0.000489812	0.000587774	4165
chr12:g.49582772T>G	5'UTR	CGAAGCA	CGACGCA	A	C	NM_006009.3:c.-10A>C	p.(=)	0.00090877	0.000403898	0.000656334	0.000656334	3951
chr12:g.49582772T>C	5'UTR	CGAAGCA	CGAGGCA	A	G	NM_006009.3:c.-10A>G	p.(=)	0.00429141	0.00262533	0.0027768	0.00323118	1167
chr12:g.49582772T>A	5'UTR	CGAAGCA	CGATGCA	A	T	NM_006009.3:c.-10A>T	p.(=)	0.000959257	0.000555359	0.000706821	0.000740479	3714
chr12:g.49582771C>T	5'UTR	GAAGCAG	GAAACAG	G	A	NM_006009.3:c.-9G>A	p.(=)	0.00661733	0.00355229	0.00424775	0.00480579	541
chr12:g.49582771C>G	5'UTR	GAAGCAG	GAACCAG	G	C	NM_006009.3:c.-9G>C	p.(=)	0.000845386	0.000499736	0.000483078	0.0006094	4102
chr12:g.49582771C>A	5'UTR	GAAGCAG	GAATCAG	G	T	NM_006009.3:c.-9G>T	p.(=)	0.0011952	0.000653821	0.000724617	0.00085788	3383
chr12:g.49582770G>T	5'UTR	AAGCAGC	AAGAAGC	C	A	NM_006009.3:c.-8C>A	p.(=)	0.00348193	0.0019136	0.00226472	0.00255342	1496
chr12:g.49582770G>C	5'UTR	AAGCAGC	AAGGAGC	C	G	NM_006009.3:c.-8C>G	p.(=)	0.00180827	0.000866095	0.000983135	0.00121916	2607
chr12:g.49582770G>A	5'UTR	AAGCAGC	AAGTAGC	C	T	NM_006009.3:c.-8C>T	p.(=)	0.00552428	0.00313667	0.00363409	0.00409834	760
chr12:g.49582769T>G	5'UTR	AGCAGCA	AGCCGCA	A	C	NM_006009.3:c.-7A>C	p.(=)	0.00107951	0.000518163	0.000734065	0.000777245	3623
chr12:g.49582769T>C	5'UTR	AGCAGCA	AGCGGCA	A	G	NM_006009.3:c.-7A>G	p.(=)	0.00352115	0.00216686	0.00250446	0.00273082	1427
chr12:g.49582769T>A	5'UTR	AGCAGCA	AGCTGCA	A	T	NM_006009.3:c.-7A>T	p.(=)	0.000863605	0.000447505	0.000557418	0.000622843	4055
chr12:g.49582768C>T	5'UTR	GCAGCAA	GCAACAA	G	A	NM_006009.3:c.-6G>A	p.(=)	0.00685551	0.00364071	0.00444004	0.00497875	491
chr12:g.49582768C>G	5'UTR	GCAGCAA	GCACCAA	G	C	NM_006009.3:c.-6G>C	p.(=)	0.00131276	0.000606785	0.000729309	0.00088295	3328
chr12:g.49582768C>A	5'UTR	GCAGCAA	GCATCAA	G	T	NM_006009.3:c.-6G>T	p.(=)	0.00128359	0.000670965	0.000799323	0.000917958	3204
chr12:g.49582767G>T	5'UTR	CAGCAAC	CAGAAAC	C	A	NM_006009.3:c.-5C>A	p.(=)	0.00310743	0.00166195	0.00202507	0.00226482	1627
chr12:g.49582767G>C	5'UTR	CAGCAAC	CAGGAAC	C	G	NM_006009.3:c.-5C>G	p.(=)	0.00151531	0.000858909	0.00090779	0.001094	2832
chr12:g.49582767G>A	5'UTR	CAGCAAC	CAGTAAC	C	T	NM_006009.3:c.-5C>T	p.(=)	0.00402919	0.00199714	0.00261862	0.00288165	1359
chr12:g.49582766T>G	5'UTR	AGCAACC	AGCCACC	A	C	NM_006009.3:c.-4A>C	p.(=)	0.00130516	0.000956452	0.00101623	0.00109261	2834
chr12:g.49582766T>C	5'UTR	AGCAACC	AGCGACC	A	G	NM_006009.3:c.-4A>G	p.(=)	0.00215202	0.00144464	0.00143468	0.00167711	2047
chr12:g.49582766T>A	5'UTR	AGCAACC	AGCTACC	A	T	NM_006009.3:c.-4A>T	p.(=)	0.000797043	0.000468263	0.00055793	0.000607745	4108
chr12:g.49582765T>G	5'UTR	GCAACCA	GCACCCA	A	C	NM_006009.3:c.-3A>C	p.(=)	0.00154166	0.00112991	0.00121609	0.00129589	2487
chr12:g.49582765T>C	5'UTR	GCAACCA	GCAGCCA	A	G	NM_006009.3:c.-3A>G	p.(=)	0.0054772	0.00318865	0.00338016	0.00401533	792
chr12:g.49582765T>A	5'UTR	GCAACCA	GCATCCA	A	T	NM_006009.3:c.-3A>T	p.(=)	0.00134057	0.000785192	0.000928825	0.0010182	2989
chr12:g.49582764G>T	5'UTR	CAACCAT	CAAACAT	C	A	NM_006009.3:c.-2C>A	p.(=)	0.00408729	0.00218382	0.00258223	0.00295111	1324
chr12:g.49582764G>C	5'UTR	CAACCAT	CAAGCAT	C	G	NM_006009.3:c.-2C>G	p.(=)	0.00161574	0.00096649	0.00101076	0.00119766	2643
chr12:g.49582764G>A	5'UTR	CAACCAT	CAATCAT	C	T	NM_006009.3:c.-2C>T	p.(=)	0.0070089	0.0033864	0.00430125	0.00489885	512
chr12:g.49582763G>T	5'UTR	AACCATG	AACAATG	C	A	NM_006009.3:c.-1C>A	p.(=)	0.00261972	0.00145616	0.00157864	0.00188484	1867
chr12:g.49582763G>C	5'UTR	AACCATG	AACGATG	C	G	NM_006009.3:c.-1C>G	p.(=)	0.0019733	0.00100026	0.00132007	0.00143121	2317
chr12:g.49582763G>A	5'UTR	AACCATG	AACTATG	C	T	NM_006009.3:c.-1C>T	p.(=)	0.00624651	0.00324574	0.00383092	0.00444106	655
chr12:g.49582762T>G	EXON1	ACCATGG	ACCCTGG	A	C	NM_006009.3:c.1A>C	p.?	0.000791344	0.000538646	0.000518696	0.000616229	4070
chr12:g.49582762T>C	EXON1	ACCATGG	ACCGTGG	A	G	NM_006009.3:c.1A>G	p.?	0.012881	0.00743465	0.00853854	0.00961805	96
chr12:g.49582762T>A	EXON1	ACCATGG	ACCTTGG	A	T	NM_006009.3:c.1A>T	p.?	0.00111719	0.000678295	0.000864494	0.00088666	3314
chr12:g.49582761A>T	EXON1	CCATGGT	CCAAGGT	T	A	NM_006009.3:c.2T>A	p.?	0.00111719	0.000678295	0.000864494	0.00088666	3315
chr12:g.49582761A>G	EXON1	CCATGGT	CCACGGT	T	C	NM_006009.3:c.2T>C	p.?	0.012881	0.00743465	0.00853854	0.00961805	97
chr12:g.49582761A>C	EXON1	CCATGGT	CCAGGGT	T	G	NM_006009.3:c.2T>G	p.?	0.000791344	0.000538646	0.000518696	0.000616229	4071
chr12:g.49582760C>T	EXON1	CATGGTG	CATAGTG	G	A	NM_006009.3:c.3G>A	p.?	0.00560033	0.00264394	0.00342979	0.00389135	838
chr12:g.49582760C>G	EXON1	CATGGTG	CATCGTG	G	C	NM_006009.3:c.3G>C	p.?	0.0011622	0.000568081	0.000707734	0.000812671	3519
chr12:g.49582760C>A	EXON1	CATGGTG	CATTGTG	G	T	NM_006009.3:c.3G>T	p.?	0.0018581	0.00086869	0.00108172	0.0012695	2523
chr12:g.49582759C>T	INTRON1	ATGGTGA	ATGATGA	G	A	NM_006009.3:c.3+1G>A		0.0070602	0.00362363	0.00458739	0.00509041	464
chr12:g.49582759C>G	INTRON1	ATGGTGA	ATGCTGA	G	C	NM_006009.3:c.3+1G>C		0.00163903	0.000852804	0.00102717	0.001173	2680
chr12:g.49582759C>A	INTRON1	ATGGTGA	ATGTTGA	G	T	NM_006009.3:c.3+1G>T		0.00212408	0.00102717	0.00128079	0.00147735	2254
chr12:g.49582758A>T	INTRON1	TGGTGAG	TGGAGAG	T	A	NM_006009.3:c.3+2T>A		0.00112001	0.000585229	0.000630635	0.000778624	3614
chr12:g.49582758A>G	INTRON1	TGGTGAG	TGGCGAG	T	C	NM_006009.3:c.3+2T>C		0.00431354	0.0026083	0.00295642	0.00329275	1135
chr12:g.49582758A>C	INTRON1	TGGTGAG	TGGGGAG	T	G	NM_006009.3:c.3+2T>G		0.00128145	0.000852618	0.00094343	0.00102583	2978
chr12:g.49582757C>T	INTRON1	GGTGAGA	GGTAAGA	G	A	NM_006009.3:c.3+3G>A		0.00725512	0.00356333	0.0044402	0.00508622	468
chr12:g.49582757C>G	INTRON1	GGTGAGA	GGTCAGA	G	C	NM_006009.3:c.3+3G>C		0.000848944	0.000435642	0.000547345	0.000610644	4097
chr12:g.49582757C>A	INTRON1	GGTGAGA	GGTTAGA	G	T	NM_006009.3:c.3+3G>T		0.000982988	0.000469153	0.000547345	0.000666495	3925
chr12:g.49582756T>G	INTRON1	GTGAGAA	GTGCGAA	A	C	NM_006009.3:c.3+4A>C		0.000467881	0.000232007	0.000274541	0.00032481	4531
chr12:g.49582756T>C	INTRON1	GTGAGAA	GTGGGAA	A	G	NM_006009.3:c.3+4A>G		0.00255981	0.00147711	0.00177099	0.00193597	1830
chr12:g.49582756T>A	INTRON1	GTGAGAA	GTGTGAA	A	T	NM_006009.3:c.3+4A>T		0.000494948	0.000305476	0.000386678	0.000395701	4492
chr12:g.49582755C>T	INTRON1	TGAGAAT	TGAAAAT	G	A	NM_006009.3:c.3+5G>A		0.00458934	0.00240299	0.00302957	0.00334063	1112
chr12:g.49582755C>G	INTRON1	TGAGAAT	TGACAAT	G	C	NM_006009.3:c.3+5G>C		0.00200305	0.00103985	0.0011765	0.00140646	2354
chr12:g.49582755C>A	INTRON1	TGAGAAT	TGATAAT	G	T	NM_006009.3:c.3+5G>T		0.00274294	0.00131981	0.00161644	0.00189306	1863
chr12:g.49582754T>G	INTRON1	GAGAATC	GAGCATC	A	C	NM_006009.3:c.3+6A>C		0.000837302	0.000458623	0.000546982	0.000614302	4080
chr12:g.49582754T>C	INTRON1	GAGAATC	GAGGATC	A	G	NM_006009.3:c.3+6A>G		0.00177138	0.000934076	0.00108975	0.00126507	2533
chr12:g.49582754T>A	INTRON1	GAGAATC	GAGTATC	A	T	NM_006009.3:c.3+6A>T		0.000740529	0.000403925	0.000500698	0.000548384	4250
chr12:g.49582753T>G	INTRON1	AGAATCG	AGACTCG	A	C	NM_006009.3:c.3+7A>C		0.00132792	0.000775714	0.000880895	0.000994842	3025
chr12:g.49582753T>C	INTRON1	AGAATCG	AGAGTCG	A	G	NM_006009.3:c.3+7A>G		0.00277416	0.00127533	0.00174864	0.00193271	1833
chr12:g.49582753T>A	INTRON1	AGAATCG	AGATTCG	A	T	NM_006009.3:c.3+7A>T		0.000617941	0.000354988	0.000407578	0.000460169	4407
chr12:g.49582752A>T	INTRON1	GAATCGG	GAAACGG	T	A	NM_006009.3:c.3+8T>A		0.00213777	0.00118765	0.00126683	0.00153075	2200
chr12:g.49582752A>G	INTRON1	GAATCGG	GAACCGG	T	C	NM_006009.3:c.3+8T>C		0.00253365	0.00150435	0.00182106	0.00195302	1816
chr12:g.49582752A>C	INTRON1	GAATCGG	GAAGCGG	T	G	NM_006009.3:c.3+8T>G		0.00110847	0.000633413	0.00102929	0.000923727	3185
chr12:g.49582751G>T	INTRON1	AATCGGC	AATAGGC	C	A	NM_006009.3:c.3+9C>A		0.0059453	0.00365212	0.00356718	0.0043882	671
chr12:g.49582751G>C	INTRON1	AATCGGC	AATGGGC	C	G	NM_006009.3:c.3+9C>G		0.00441651	0.00382198	0.00339732	0.0038786	842
chr12:g.49582751G>A	INTRON1	AATCGGC	AATTGGC	C	T	NM_006009.3:c.3+9C>T		0.0780533	0.0424665	0.0491762	0.0565653	48
chr12:g.49582750C>T	INTRON1	ATCGGCT	ATCAGCT	G	A	NM_006009.3:c.3+10G>A		0.0805735	0.0475269	0.0550538	0.0610514	35
chr12:g.49582750C>G	INTRON1	ATCGGCT	ATCCGCT	G	C	NM_006009.3:c.3+10G>C		0.00250896	0.00136201	0.00150538	0.00179211	1936
chr12:g.49582750C>A	INTRON1	ATCGGCT	ATCTGCT	G	T	NM_006009.3:c.3+10G>T		0.00659498	0.00422939	0.00516129	0.00532855	410
chr12:g.49582749C>T	INTRON1	TCGGCTT	TCGACTT	G	A	NM_006009.3:c.3+11G>A		0.00458407	0.00189686	0.00268722	0.00305605	1262
chr12:g.49582749C>G	INTRON1	TCGGCTT	TCGCCTT	G	C	NM_006009.3:c.3+11G>C		0.00165975	0.000790358	0.000987947	0.00114602	2740
chr12:g.49582749C>A	INTRON1	TCGGCTT	TCGTCTT	G	T	NM_006009.3:c.3+11G>T		0.00209445	0.00118554	0.00158071	0.00162023	2091
chr12:g.49582748G>T	INTRON1	CGGCTTC	CGGATTC	C	A	NM_006009.3:c.3+12C>A		0.00143	0.000679251	0.000965251	0.00102483	2981
chr12:g.49582748G>C	INTRON1	CGGCTTC	CGGGTTC	C	G	NM_006009.3:c.3+12C>G		0.0016445	0.00132275	0.0015015	0.00148959	2242
chr12:g.49582748G>A	INTRON1	CGGCTTC	CGGTTTC	C	T	NM_006009.3:c.3+12C>T		0.00496925	0.00232375	0.003003	0.003432	1064
chr12:g.49582747A>T	INTRON1	GGCTTCG	GGCATCG	T	A	NM_006009.3:c.3+13T>A		0.000945001	0.000630001	0.000630001	0.000735001	3726
chr12:g.49582747A>G	INTRON1	GGCTTCG	GGCCTCG	T	C	NM_006009.3:c.3+13T>C		0.002898	0.001386	0.002268	0.002184	1677
chr12:g.49582747A>C	INTRON1	GGCTTCG	GGCGTCG	T	G	NM_006009.3:c.3+13T>G		0.000630001	0.000378	0.000441	0.000483	4368
chr12:g.49582746A>T	INTRON1	GCTTCGG	GCTACGG	T	A	NM_006009.3:c.3+14T>A		0.000660139	0.000440092	0.000440092	0.000513441	4321
chr12:g.49582746A>G	INTRON1	GCTTCGG	GCTCCGG	T	C	NM_006009.3:c.3+14T>C		0.00275058	0.00187039	0.00203543	0.0022188	1652
chr12:g.49582746A>C	INTRON1	GCTTCGG	GCTGCGG	T	G	NM_006009.3:c.3+14T>G		0.00181538	0.00132028	0.00126527	0.00146697	2273
chr12:g.49582745G>T	INTRON1	CTTCGGC	CTTAGGC	C	A	NM_006009.3:c.3+15C>A		0.00383686	0.00204983	0.0027331	0.00287326	1364
chr12:g.49582745G>C	INTRON1	CTTCGGC	CTTGGGC	C	G	NM_006009.3:c.3+15C>G		0.00409965	0.00304846	0.00336382	0.00350398	1024
chr12:g.49582745G>A	INTRON1	CTTCGGC	CTTTGGC	C	T	NM_006009.3:c.3+15C>T		0.0926101	0.0505624	0.0608641	0.0680122	22
chr12:g.49582744C>T	INTRON1	TTCGGCT	TTCAGCT	G	A	NM_006009.3:c.3+16G>A		0.0865363	0.046387	0.055392	0.0627718	33
chr12:g.49582744C>G	INTRON1	TTCGGCT	TTCCGCT	G	C	NM_006009.3:c.3+16G>C		0.00351417	0.00193279	0.00219635	0.00254777	1498
chr12:g.49582744C>A	INTRON1	TTCGGCT	TTCTGCT	G	T	NM_006009.3:c.3+16G>T		0.00566659	0.00320668	0.00382166	0.00423164	717
chr12:g.49582743C>T	INTRON1	TCGGCTC	TCGACTC	G	A	NM_006009.3:c.3+17G>A		0.00365176	0.00196413	0.00259341	0.00273643	1425
chr12:g.49582743C>G	INTRON1	TCGGCTC	TCGCCTC	G	C	NM_006009.3:c.3+17G>C		0.00122043	0.000629285	0.0007437	0.000864472	3364
chr12:g.49582743C>A	INTRON1	TCGGCTC	TCGTCTC	G	T	NM_006009.3:c.3+17G>T		0.00186878	0.000953462	0.00112509	0.00131578	2462
chr12:g.49582742G>T	INTRON1	CGGCTCT	CGGATCT	C	A	NM_006009.3:c.3+18C>A		0.00114346	0.000307855	0.000703668	0.000718328	3770
chr12:g.49582742G>C	INTRON1	CGGCTCT	CGGGTCT	C	G	NM_006009.3:c.3+18C>G		0.0012754	0.000703668	0.000835606	0.000938224	3153
chr12:g.49582742G>A	INTRON1	CGGCTCT	CGGTTCT	C	T	NM_006009.3:c.3+18C>T		0.00505761	0.00303457	0.00356232	0.00388483	841
chr12:g.49582741A>T	INTRON1	GGCTCTT	GGCACTT	T	A	NM_006009.3:c.3+19T>A		0.000803237	0.000450413	0.000608058	0.000620569	4060
chr12:g.49582741A>G	INTRON1	GGCTCTT	GGCCCTT	T	C	NM_006009.3:c.3+19T>C		0.00269497	0.00154642	0.00205689	0.00209943	1720
chr12:g.49582741A>C	INTRON1	GGCTCTT	GGCGCTT	T	G	NM_006009.3:c.3+19T>G		0.000600551	0.000300276	0.000472934	0.00045792	4414
chr12:g.49582740G>T	INTRON1	GCTCTTT	GCTATTT	C	A	NM_006009.3:c.3+20C>A		0.0018437	0.000972552	0.0012445	0.00135358	2420
chr12:g.49582740G>C	INTRON1	GCTCTTT	GCTGTTT	C	G	NM_006009.3:c.3+20C>G		0.00515775	0.00283469	0.00326796	0.00375347	898
chr12:g.49582740G>A	INTRON1	GCTCTTT	GCTTTTT	C	T	NM_006009.3:c.3+20C>T		0.00550345	0.00288539	0.00352147	0.0039701	810
chr12:g.49580636A>T	INTRON1	TTTTTCA	TTTATCA	T	A	NM_006009.3:c.4-20T>A		0.00061926	0.000388685	0.000421624	0.000476523	4381
chr12:g.49580636A>G	INTRON1	TTTTTCA	TTTCTCA	T	C	NM_006009.3:c.4-20T>C		0.00313254	0.00174249	0.00198954	0.00228819	1618
chr12:g.49580636A>C	INTRON1	TTTTTCA	TTTGTCA	T	G	NM_006009.3:c.4-20T>G		0.00098324	0.000589615	0.000648906	0.000740587	3711
chr12:g.49580635A>T	INTRON1	TTTTCAC	TTTACAC	T	A	NM_006009.3:c.4-19T>A		0.000729222	0.000355016	0.000425379	0.000503206	4340
chr12:g.49580635A>G	INTRON1	TTTTCAC	TTTCCAC	T	C	NM_006009.3:c.4-19T>C		0.00284013	0.00168873	0.00187103	0.00213329	1704
chr12:g.49580635A>C	INTRON1	TTTTCAC	TTTGCAC	T	G	NM_006009.3:c.4-19T>G		0.000844362	0.000476553	0.000604487	0.000641801	3997
chr12:g.49580634G>T	INTRON1	TTTCACT	TTTAACT	C	A	NM_006009.3:c.4-18C>A		0.00117961	0.000620265	0.000747641	0.000849172	3406
chr12:g.49580634G>C	INTRON1	TTTCACT	TTTGACT	C	G	NM_006009.3:c.4-18C>G		0.00083625	0.000556577	0.000592575	0.000661801	3940
chr12:g.49580634G>A	INTRON1	TTTCACT	TTTTACT	C	T	NM_006009.3:c.4-18C>T		0.00413141	0.00226784	0.00261397	0.00300441	1290
chr12:g.49580633T>G	INTRON1	TTCACTT	TTCCCTT	A	C	NM_006009.3:c.4-17A>C		0.00158304	0.000909833	0.000993151	0.00116201	2708
chr12:g.49580633T>C	INTRON1	TTCACTT	TTCGCTT	A	G	NM_006009.3:c.4-17A>G		0.0039826	0.00244622	0.00266285	0.00303056	1282
chr12:g.49580633T>A	INTRON1	TTCACTT	TTCTCTT	A	T	NM_006009.3:c.4-17A>T		0.00131309	0.000776524	0.000919831	0.00100315	3016
chr12:g.49580632G>T	INTRON1	TCACTTT	TCAATTT	C	A	NM_006009.3:c.4-16C>A		0.00149811	0.000878542	0.000944104	0.00110692	2813
chr12:g.49580632G>C	INTRON1	TCACTTT	TCAGTTT	C	G	NM_006009.3:c.4-16C>G		0.00254711	0.00135387	0.0016489	0.00184996	1893
chr12:g.49580632G>A	INTRON1	TCACTTT	TCATTTT	C	T	NM_006009.3:c.4-16C>T		0.0069431	0.00369119	0.00453367	0.00505598	476
chr12:g.49580631A>T	INTRON1	CACTTTT	CACATTT	T	A	NM_006009.3:c.4-15T>A		0.00160192	0.000898942	0.000995368	0.00116541	2697
chr12:g.49580631A>G	INTRON1	CACTTTT	CACCTTT	T	C	NM_006009.3:c.4-15T>C		0.00278703	0.00164236	0.00182899	0.00208613	1725
chr12:g.49580631A>C	INTRON1	CACTTTT	CACGTTT	T	G	NM_006009.3:c.4-15T>G		0.00139663	0.0006501	0.000889611	0.000978779	3060
chr12:g.49580630A>T	INTRON1	ACTTTTC	ACTATTC	T	A	NM_006009.3:c.4-14T>A		0.000601325	0.000328675	0.000478072	0.000469357	4391
chr12:g.49580630A>G	INTRON1	ACTTTTC	ACTCTTC	T	C	NM_006009.3:c.4-14T>C		0.00242771	0.00132217	0.00147904	0.00174297	1976
chr12:g.49580630A>C	INTRON1	ACTTTTC	ACTGTTC	T	G	NM_006009.3:c.4-14T>G		0.000918795	0.000530361	0.000608795	0.000685984	3857
chr12:g.49580629A>T	INTRON1	CTTTTCC	CTTATCC	T	A	NM_006009.3:c.4-13T>A		0.000375906	0.000236106	0.000279599	0.000297204	4543
chr12:g.49580629A>G	INTRON1	CTTTTCC	CTTCTCC	T	C	NM_006009.3:c.4-13T>C		0.00305074	0.00177701	0.00203797	0.00228857	1617
chr12:g.49580629A>C	INTRON1	CTTTTCC	CTTGTCC	T	G	NM_006009.3:c.4-13T>G		0.000531239	0.000326199	0.000360373	0.000405937	4472
chr12:g.49580628A>T	INTRON1	TTTTCCT	TTTACCT	T	A	NM_006009.3:c.4-12T>A		0.000527885	0.000319421	0.000348	0.000398435	4488
chr12:g.49580628A>G	INTRON1	TTTTCCT	TTTCCCT	T	C	NM_006009.3:c.4-12T>C		0.00413229	0.00222418	0.00265119	0.00300255	1292
chr12:g.49580628A>C	INTRON1	TTTTCCT	TTTGCCT	T	G	NM_006009.3:c.4-12T>G		0.000959943	0.000573276	0.000655653	0.000729624	3736
chr12:g.49580627G>T	INTRON1	TTTCCTC	TTTACTC	C	A	NM_006009.3:c.4-11C>A		0.00124934	0.000665014	0.000770748	0.000895033	3277
chr12:g.49580627G>C	INTRON1	TTTCCTC	TTTGCTC	C	G	NM_006009.3:c.4-11C>G		0.000979435	0.000550932	0.000603799	0.000711389	3785
chr12:g.49580627G>A	INTRON1	TTTCCTC	TTTTCTC	C	T	NM_006009.3:c.4-11C>T		0.005974	0.00326107	0.00454101	0.00459203	605
chr12:g.49580626G>T	INTRON1	TTCCTCC	TTCATCC	C	A	NM_006009.3:c.4-10C>A		0.000921487	0.000541638	0.000657703	0.000706943	3799
chr12:g.49580626G>C	INTRON1	TTCCTCC	TTCGTCC	C	G	NM_006009.3:c.4-10C>G		0.00105865	0.000590877	0.000654186	0.000767906	3646
chr12:g.49580626G>A	INTRON1	TTCCTCC	TTCTTCC	C	T	NM_006009.3:c.4-10C>T		0.00823008	0.00446323	0.00510335	0.00593222	280
chr12:g.49580625A>T	INTRON1	TCCTCCC	TCCACCC	T	A	NM_006009.3:c.4-9T>A		0.000897861	0.000457531	0.000560733	0.000638708	4007
chr12:g.49580625A>G	INTRON1	TCCTCCC	TCCCCCC	T	C	NM_006009.3:c.4-9T>C		0.00202965	0.0010045	0.00133131	0.00145515	2289
chr12:g.49580625A>C	INTRON1	TCCTCCC	TCCGCCC	T	G	NM_006009.3:c.4-9T>G		0.000794658	0.000536652	0.000557293	0.000629534	4031
chr12:g.49580624G>T	INTRON1	CCTCCCC	CCTACCC	C	A	NM_006009.3:c.4-8C>A		0.00241741	0.00118283	0.00153399	0.00171141	2007
chr12:g.49580624G>C	INTRON1	CCTCCCC	CCTGCCC	C	G	NM_006009.3:c.4-8C>G		0.00169663	0.000931481	0.00113848	0.00125553	2547
chr12:g.49580624G>A	INTRON1	CCTCCCC	CCTTCCC	C	T	NM_006009.3:c.4-8C>T		0.00793237	0.0042545	0.00553714	0.005908	286
chr12:g.49580623G>T	INTRON1	CTCCCCA	CTCACCA	C	A	NM_006009.3:c.4-7C>A		0.00133049	0.000737854	0.000855597	0.000974648	3064
chr12:g.49580623G>C	INTRON1	CTCCCCA	CTCGCCA	C	G	NM_006009.3:c.4-7C>G		0.00100081	0.000510218	0.000608337	0.000706456	3805
chr12:g.49580623G>A	INTRON1	CTCCCCA	CTCTCCA	C	T	NM_006009.3:c.4-7C>T		0.00740601	0.00379524	0.00465083	0.00528403	421
chr12:g.49580622G>T	INTRON1	TCCCCAC	TCCACAC	C	A	NM_006009.3:c.4-6C>A		0.00119161	0.00064772	0.000845497	0.000894941	3278
chr12:g.49580622G>C	INTRON1	TCCCCAC	TCCGCAC	C	G	NM_006009.3:c.4-6C>G		0.00190855	0.000934496	0.00125588	0.00136631	2404
chr12:g.49580622G>A	INTRON1	TCCCCAC	TCCTCAC	C	T	NM_006009.3:c.4-6C>T		0.00647225	0.0031941	0.00403465	0.004567	616
chr12:g.49580621G>T	INTRON1	CCCCACA	CCCAACA	C	A	NM_006009.3:c.4-5C>A		0.00400136	0.00227273	0.00268647	0.00298685	1304
chr12:g.49580621G>C	INTRON1	CCCCACA	CCCGACA	C	G	NM_006009.3:c.4-5C>G		0.00321356	0.00169463	0.00200068	0.00230295	1603
chr12:g.49580621G>A	INTRON1	CCCCACA	CCCTACA	C	T	NM_006009.3:c.4-5C>T		0.00750397	0.00371798	0.00461347	0.00527847	425
chr12:g.49580620T>G	INTRON1	CCCACAG	CCCCCAG	A	C	NM_006009.3:c.4-4A>C		0.00131351	0.000869233	0.000936841	0.00103986	2949
chr12:g.49580620T>C	INTRON1	CCCACAG	CCCGCAG	A	G	NM_006009.3:c.4-4A>G		0.00489668	0.00294091	0.00337552	0.0037377	907
chr12:g.49580620T>A	INTRON1	CCCACAG	CCCTCAG	A	T	NM_006009.3:c.4-4A>T		0.000801626	0.000463591	0.000458762	0.00057466	4189
chr12:g.49580619G>T	INTRON1	CCACAGC	CCAAAGC	C	A	NM_006009.3:c.4-3C>A		0.00135649	0.000715628	0.000865163	0.000979094	3056
chr12:g.49580619G>C	INTRON1	CCACAGC	CCAGAGC	C	G	NM_006009.3:c.4-3C>G		0.00200269	0.00113219	0.00136183	0.0014989	2226
chr12:g.49580619G>A	INTRON1	CCACAGC	CCATAGC	C	T	NM_006009.3:c.4-3C>T		0.0079894	0.00431513	0.00491861	0.00574105	322
chr12:g.49580618T>G	INTRON1	CACAGCG	CACCGCG	A	C	NM_006009.3:c.4-2A>C		0.00201982	0.00173578	0.00173578	0.00183046	1913
chr12:g.49580618T>C	INTRON1	CACAGCG	CACGGCG	A	G	NM_006009.3:c.4-2A>G		0.00665909	0.00400808	0.00482863	0.00516527	449
chr12:g.49580618T>A	INTRON1	CACAGCG	CACTGCG	A	T	NM_006009.3:c.4-2A>T		0.00129395	0.000820552	0.00097835	0.00103095	2967
chr12:g.49580617C>T	INTRON1	ACAGCGT	ACAACGT	G	A	NM_006009.3:c.4-1G>A		0.00849658	0.00432696	0.00495634	0.00592663	285
chr12:g.49580617C>G	INTRON1	ACAGCGT	ACACCGT	G	C	NM_006009.3:c.4-1G>C		0.00204547	0.000944064	0.00129809	0.00142921	2322
chr12:g.49580617C>A	INTRON1	ACAGCGT	ACATCGT	G	T	NM_006009.3:c.4-1G>T		0.00114074	0.000511368	0.000550704	0.000734272	3729
chr12:g.49580616G>T	EXON2	CAGCGTG	CAGAGTG	C	A	NM_006009.3:c.4C>A	p.(Arg2Ser)	0.00816628	0.00490994	0.00546962	0.00618195	244
chr12:g.49580616G>C	EXON2	CAGCGTG	CAGGGTG	C	G	NM_006009.3:c.4C>G	p.(Arg2Gly)	0.00440114	0.00300193	0.00340897	0.00360402	968
chr12:g.49580616G>A	EXON2	CAGCGTG	CAGTGTG	C	T	NM_006009.3:c.4C>T	p.(Arg2Cys)	0.0687901	0.0382365	0.0453088	0.0507785	56
chr12:g.49580615C>T	EXON2	AGCGTGA	AGCATGA	G	A	NM_006009.3:c.5G>A	p.(Arg2His)	0.112347	0.0635636	0.0736481	0.0831863	7
chr12:g.49580615C>G	EXON2	AGCGTGA	AGCCTGA	G	C	NM_006009.3:c.5G>C	p.(Arg2Pro)	0.00453801	0.00302534	0.00343502	0.00366612	939
chr12:g.49580615C>A	EXON2	AGCGTGA	AGCTTGA	G	T	NM_006009.3:c.5G>T	p.(Arg2Leu)	0.00501071	0.00267868	0.00311988	0.00360309	969
chr12:g.49580614A>T	EXON2	GCGTGAG	GCGAGAG	T	A	NM_006009.3:c.6T>A	p.(=)	0.000954233	0.00056887	0.000596396	0.0007065	3802
chr12:g.49580614A>G	EXON2	GCGTGAG	GCGCGAG	T	C	NM_006009.3:c.6T>C	p.(=)	0.0021562	0.00124784	0.00161486	0.00167297	2052
chr12:g.49580614A>C	EXON2	GCGTGAG	GCGGGAG	T	G	NM_006009.3:c.6T>G	p.(=)	0.000660623	0.000367013	0.000367013	0.000464883	4399
chr12:g.49580613C>T	EXON2	CGTGAGT	CGTAAGT	G	A	NM_006009.3:c.7G>A	p.(Glu3Lys)	0.00504601	0.00190815	0.00292584	0.00329333	1133
chr12:g.49580613C>G	EXON2	CGTGAGT	CGTCAGT	G	C	NM_006009.3:c.7G>C	p.(Glu3Gln)	0.00190815	0.000848069	0.00139931	0.00138518	2382
chr12:g.49580613C>A	EXON2	CGTGAGT	CGTTAGT	G	T	NM_006009.3:c.7G>T	p.(Glu3*)	0.0011873	0.000593648	0.000593648	0.000791531	3565
chr12:g.49580612T>G	EXON2	GTGAGTG	GTGCGTG	A	C	NM_006009.3:c.8A>C	p.(Glu3Ala)	0.00101201	0.000566471	0.000668309	0.00074893	3688
chr12:g.49580612T>C	EXON2	GTGAGTG	GTGGGTG	A	G	NM_006009.3:c.8A>G	p.(Glu3Gly)	0.00299784	0.00199856	0.00201766	0.00233802	1586
chr12:g.49580612T>A	EXON2	GTGAGTG	GTGTGTG	A	T	NM_006009.3:c.8A>T	p.(Glu3Val)	0.0017376	0.00123478	0.00137481	0.00144906	2299
chr12:g.49580611C>T	EXON2	TGAGTGC	TGAATGC	G	A	NM_006009.3:c.9G>A	p.(=)	0.00791008	0.00439653	0.0053623	0.00588964	293
chr12:g.49580611C>G	EXON2	TGAGTGC	TGACTGC	G	C	NM_006009.3:c.9G>C	p.(Glu3Asp)	0.00286051	0.00142565	0.00175677	0.00201431	1776
chr12:g.49580611C>A	EXON2	TGAGTGC	TGATTGC	G	T	NM_006009.3:c.9G>T	p.(Glu3Asp)	0.00103935	0.000607053	0.000689833	0.000778745	3611
chr12:g.49580610A>T	EXON2	GAGTGCA	GAGAGCA	T	A	NM_006009.3:c.10T>A	p.(Cys4Ser)	0.00161504	0.000853056	0.00101699	0.00116169	2710
chr12:g.49580610A>G	EXON2	GAGTGCA	GAGCGCA	T	C	NM_006009.3:c.10T>C	p.(Cys4Arg)	0.00417421	0.00244684	0.00276256	0.00312787	1225
chr12:g.49580610A>C	EXON2	GAGTGCA	GAGGGCA	T	G	NM_006009.3:c.10T>G	p.(Cys4Gly)	0.00278989	0.00168486	0.00206433	0.00217969	1681
chr12:g.49580609C>T	EXON2	AGTGCAT	AGTACAT	G	A	NM_006009.3:c.11G>A	p.(Cys4Tyr)	0.0082585	0.00441117	0.00490867	0.00585944	298
chr12:g.49580609C>G	EXON2	AGTGCAT	AGTCCAT	G	C	NM_006009.3:c.11G>C	p.(Cys4Ser)	0.00134325	0.000721375	0.000796	0.000953542	3111
chr12:g.49580609C>A	EXON2	AGTGCAT	AGTTCAT	G	T	NM_006009.3:c.11G>T	p.(Cys4Phe)	0.0028855	0.00144275	0.00194854	0.00209226	1723
chr12:g.49580608G>T	EXON2	GTGCATC	GTGAATC	C	A	NM_006009.3:c.12C>A	p.(Cys4*)	0.00174975	0.000741422	0.00102316	0.00117145	2688
chr12:g.49580608G>C	EXON2	GTGCATC	GTGGATC	C	G	NM_006009.3:c.12C>G	p.(Cys4Trp)	0.00117145	0.000815564	0.000830392	0.000939134	3149
chr12:g.49580608G>A	EXON2	GTGCATC	GTGTATC	C	T	NM_006009.3:c.12C>T	p.(=)	0.00760699	0.00441887	0.00499718	0.00567435	336
chr12:g.49580607T>G	EXON2	TGCATCT	TGCCTCT	A	C	NM_006009.3:c.13A>C	p.(Ile5Leu)	0.00241956	0.00125558	0.00135797	0.0016777	2045
chr12:g.49580607T>C	EXON2	TGCATCT	TGCGTCT	A	G	NM_006009.3:c.13A>G	p.(Ile5Val)	0.00967824	0.00569054	0.00660664	0.00732514	144
chr12:g.49580607T>A	EXON2	TGCATCT	TGCTTCT	A	T	NM_006009.3:c.13A>T	p.(Ile5Phe)	0.00193457	0.00114242	0.00123942	0.0014388	2307
chr12:g.49580606A>T	EXON2	GCATCTC	GCAACTC	T	A	NM_006009.3:c.14T>A	p.(Ile5Asn)	0.00279822	0.00156909	0.00176087	0.00204273	1754
chr12:g.49580606A>G	EXON2	GCATCTC	GCACCTC	T	C	NM_006009.3:c.14T>C	p.(Ile5Thr)	0.00391401	0.00235364	0.00259772	0.00295512	1321
chr12:g.49580606A>C	EXON2	GCATCTC	GCAGCTC	T	G	NM_006009.3:c.14T>G	p.(Ile5Ser)	0.000871718	0.00061892	0.00067994	0.000723526	3753
chr12:g.49580605G>T	EXON2	CATCTCC	CATATCC	C	A	NM_006009.3:c.15C>A	p.(=)	0.00144089	0.000794609	0.000932342	0.00105595	2907
chr12:g.49580605G>C	EXON2	CATCTCC	CATGTCC	C	G	NM_006009.3:c.15C>G	p.(Ile5Met)	0.0016316	0.000858178	0.00102769	0.00117249	2685
chr12:g.49580605G>A	EXON2	CATCTCC	CATTTCC	C	T	NM_006009.3:c.15C>T	p.(=)	0.00482063	0.00248978	0.00311487	0.00347509	1042
chr12:g.49580604A>T	EXON2	ATCTCCA	ATCACCA	T	A	NM_006009.3:c.16T>A	p.(Ser6Thr)	0.000810508	0.000476769	0.000529214	0.000605497	4110
chr12:g.49580604A>G	EXON2	ATCTCCA	ATCCCCA	T	C	NM_006009.3:c.16T>C	p.(Ser6Pro)	0.00271759	0.00164962	0.00198813	0.00211845	1714
chr12:g.49580604A>C	EXON2	ATCTCCA	ATCGCCA	T	G	NM_006009.3:c.16T>G	p.(Ser6Ala)	0.0012539	0.000624568	0.00074376	0.000874077	3347
chr12:g.49580603G>T	EXON2	TCTCCAT	TCTACAT	C	A	NM_006009.3:c.17C>A	p.(Ser6Tyr)	0.0012554	0.000655638	0.000841898	0.000917644	3206
chr12:g.49580603G>C	EXON2	TCTCCAT	TCTGCAT	C	G	NM_006009.3:c.17C>G	p.(Ser6Cys)	0.00250334	0.00138578	0.00153106	0.00180673	1929
chr12:g.49580603G>A	EXON2	TCTCCAT	TCTTCAT	C	T	NM_006009.3:c.17C>T	p.(Ser6Phe)	0.00464534	0.00247354	0.00324839	0.00345576	1051
chr12:g.49580602G>T	EXON2	CTCCATC	CTCAATC	C	A	NM_006009.3:c.18C>A	p.(=)	0.000926194	0.000499306	0.00056029	0.00066193	3935
chr12:g.49580602G>C	EXON2	CTCCATC	CTCGATC	C	G	NM_006009.3:c.18C>G	p.(=)	0.000800415	0.000590782	0.000663201	0.000684799	3862
chr12:g.49580602G>A	EXON2	CTCCATC	CTCTATC	C	T	NM_006009.3:c.18C>T	p.(=)	0.0063652	0.00325883	0.00391441	0.00451281	627
chr12:g.49580601T>G	EXON2	TCCATCC	TCCCTCC	A	C	NM_006009.3:c.19A>C	p.(Ile7Leu)	0.00166134	0.00103045	0.00124075	0.00131085	2465
chr12:g.49580601T>C	EXON2	TCCATCC	TCCGTCC	A	G	NM_006009.3:c.19A>G	p.(Ile7Val)	0.00602498	0.00360132	0.00416912	0.00459847	602
chr12:g.49580601T>A	EXON2	TCCATCC	TCCTTCC	A	T	NM_006009.3:c.19A>T	p.(Ile7Phe)	0.00170866	0.00102519	0.00123023	0.00132136	2457
chr12:g.49580600A>T	EXON2	CCATCCA	CCAACCA	T	A	NM_006009.3:c.20T>A	p.(Ile7Asn)	0.00224444	0.00113311	0.00137826	0.00158527	2134
chr12:g.49580600A>G	EXON2	CCATCCA	CCACCCA	T	C	NM_006009.3:c.20T>C	p.(Ile7Thr)	0.00621578	0.00351919	0.00427641	0.00467046	585
chr12:g.49580600A>C	EXON2	CCATCCA	CCAGCCA	T	G	NM_006009.3:c.20T>G	p.(Ile7Ser)	0.00119304	0.00067551	0.000806254	0.000891601	3295
chr12:g.49580599G>T	EXON2	CATCCAC	CATACAC	C	A	NM_006009.3:c.21C>A	p.(=)	0.00205892	0.00136229	0.00132359	0.0015816	2137
chr12:g.49580599G>C	EXON2	CATCCAC	CATGCAC	C	G	NM_006009.3:c.21C>G	p.(Ile7Met)	0.00164094	0.000874654	0.000983018	0.00116621	2695
chr12:g.49580599G>A	EXON2	CATCCAC	CATTCAC	C	T	NM_006009.3:c.21C>T	p.(=)	0.00479124	0.00258526	0.00345217	0.00360956	964
chr12:g.49580598G>T	EXON2	ATCCACG	ATCAACG	C	A	NM_006009.3:c.22C>A	p.(His8Asn)	0.000848644	0.000594051	0.000594051	0.000678915	3884
chr12:g.49580598G>C	EXON2	ATCCACG	ATCGACG	C	G	NM_006009.3:c.22C>G	p.(His8Asp)	0.000891077	0.000594051	0.000594051	0.00069306	3834
chr12:g.49580598G>A	EXON2	ATCCACG	ATCTACG	C	T	NM_006009.3:c.22C>T	p.(His8Tyr)	0.00547376	0.00246107	0.00271566	0.00355016	1000
chr12:g.49580597T>G	EXON2	TCCACGT	TCCCCGT	A	C	NM_006009.3:c.23A>C	p.(His8Pro)	0.00131868	0.000683761	0.000830281	0.000944241	3125
chr12:g.49580597T>C	EXON2	TCCACGT	TCCGCGT	A	G	NM_006009.3:c.23A>G	p.(His8Arg)	0.00371184	0.00202686	0.00263736	0.00279202	1399
chr12:g.49580597T>A	EXON2	TCCACGT	TCCTCGT	A	T	NM_006009.3:c.23A>T	p.(His8Leu)	0.00102564	0.000512821	0.000561661	0.000700041	3823
chr12:g.49580596G>T	EXON2	CCACGTT	CCAAGTT	C	A	NM_006009.3:c.24C>A	p.(His8Gln)	0.00581537	0.00317646	0.00366515	0.004219	723
chr12:g.49580596G>C	EXON2	CCACGTT	CCAGGTT	C	G	NM_006009.3:c.24C>G	p.(His8Gln)	0.00422714	0.00288325	0.0032009	0.0034371	1057
chr12:g.49580596G>A	EXON2	CCACGTT	CCATGTT	C	T	NM_006009.3:c.24C>T	p.(=)	0.0816596	0.047085	0.0538289	0.0608578	37
chr12:g.49580595C>T	EXON2	CACGTTG	CACATTG	G	A	NM_006009.3:c.25G>A	p.(Val9Ile)	0.0905266	0.0495456	0.0578862	0.0659861	25
chr12:g.49580595C>G	EXON2	CACGTTG	CACCTTG	G	C	NM_006009.3:c.25G>C	p.(Val9Leu)	0.00383418	0.00231545	0.00251463	0.00288809	1357
chr12:g.49580595C>A	EXON2	CACGTTG	CACTTTG	G	T	NM_006009.3:c.25G>T	p.(Val9Phe)	0.00876385	0.00490477	0.00572638	0.006465	206
chr12:g.49580594A>T	EXON2	ACGTTGG	ACGATGG	T	A	NM_006009.3:c.26T>A	p.(Val9Asp)	0.00134121	0.000869975	0.000942473	0.00105122	2919
chr12:g.49580594A>G	EXON2	ACGTTGG	ACGCTGG	T	C	NM_006009.3:c.26T>C	p.(Val9Ala)	0.0168558	0.00844601	0.0108384	0.0120467	80
chr12:g.49580594A>C	EXON2	ACGTTGG	ACGGTGG	T	G	NM_006009.3:c.26T>G	p.(Val9Gly)	0.00173995	0.00101497	0.00123247	0.00132913	2436
chr12:g.49580593A>T	EXON2	CGTTGGC	CGTAGGC	T	A	NM_006009.3:c.27T>A	p.(=)	0.000552625	0.000452148	0.000602864	0.000535879	4279
chr12:g.49580593A>G	EXON2	CGTTGGC	CGTCGGC	T	C	NM_006009.3:c.27T>C	p.(=)	0.00271289	0.00160764	0.00185883	0.00205978	1743
chr12:g.49580593A>C	EXON2	CGTTGGC	CGTGGGC	T	G	NM_006009.3:c.27T>G	p.(=)	0.00120573	0.000401909	0.000301432	0.000636356	4017
chr12:g.49580592C>T	EXON2	GTTGGCC	GTTAGCC	G	A	NM_006009.3:c.28G>A	p.(Gly10Ser)	0.00539144	0.0033292	0.00384476	0.00418847	731
chr12:g.49580592C>G	EXON2	GTTGGCC	GTTCGCC	G	C	NM_006009.3:c.28G>C	p.(Gly10Arg)	0.000636223	0.000329081	0.00034005	0.000435118	4447
chr12:g.49580592C>A	EXON2	GTTGGCC	GTTTGCC	G	T	NM_006009.3:c.28G>T	p.(Gly10Cys)	0.001075	0.000575892	0.00069107	0.000780653	3602
chr12:g.49580591C>T	EXON2	TTGGCCA	TTGACCA	G	A	NM_006009.3:c.29G>A	p.(Gly10Asp)	0.00617264	0.00329405	0.00390406	0.00445692	651
chr12:g.49580591C>G	EXON2	TTGGCCA	TTGCCCA	G	C	NM_006009.3:c.29G>C	p.(Gly10Ala)	0.00143105	0.000830932	0.000913365	0.00105845	2898
chr12:g.49580591C>A	EXON2	TTGGCCA	TTGTCCA	G	T	NM_006009.3:c.29G>T	p.(Gly10Val)	0.00255544	0.00137829	0.00163878	0.00185751	1888
chr12:g.49580590G>T	EXON2	TGGCCAG	TGGACAG	C	A	NM_006009.3:c.30C>A	p.(=)	0.00186454	0.000961961	0.00122027	0.00134892	2424
chr12:g.49580590G>C	EXON2	TGGCCAG	TGGGCAG	C	G	NM_006009.3:c.30C>G	p.(=)	0.00118464	0.000587865	0.000703657	0.000825386	3480
chr12:g.49580590G>A	EXON2	TGGCCAG	TGGTCAG	C	T	NM_006009.3:c.30C>T	p.(=)	0.00599147	0.00296308	0.00385081	0.00426845	701
chr12:g.49580589G>T	EXON2	GGCCAGG	GGCAAGG	C	A	NM_006009.3:c.31C>A	p.(Gln11Lys)	0.00102554	0.000506215	0.000689816	0.000740525	3712
chr12:g.49580589G>C	EXON2	GGCCAGG	GGCGAGG	C	G	NM_006009.3:c.31C>G	p.(Gln11Glu)	0.000883909	0.000461626	0.000590147	0.000645227	3988
chr12:g.49580589G>A	EXON2	GGCCAGG	GGCTAGG	C	T	NM_006009.3:c.31C>T	p.(Gln11*)	0.00394218	0.00198289	0.00243403	0.00278637	1402
chr12:g.49580588T>G	EXON2	GCCAGGC	GCCCGGC	A	C	NM_006009.3:c.32A>C	p.(Gln11Pro)	0.00117948	0.00067662	0.000839852	0.00089865	3257
chr12:g.49580588T>C	EXON2	GCCAGGC	GCCGGGC	A	G	NM_006009.3:c.32A>G	p.(Gln11Arg)	0.00725853	0.00506281	0.00577365	0.00603166	262
chr12:g.49580588T>A	EXON2	GCCAGGC	GCCTGGC	A	T	NM_006009.3:c.32A>T	p.(Gln11Leu)	0.000887241	0.000481796	0.000537084	0.000635374	4018
chr12:g.49580587C>T	EXON2	CCAGGCT	CCAAGCT	G	A	NM_006009.3:c.33G>A	p.(=)	0.00381032	0.00212324	0.00252584	0.0028198	1385
chr12:g.49580587C>G	EXON2	CCAGGCT	CCACGCT	G	C	NM_006009.3:c.33G>C	p.(Gln11His)	0.00160401	0.000755674	0.00096017	0.00110662	2814
chr12:g.49580587C>A	EXON2	CCAGGCT	CCATGCT	G	T	NM_006009.3:c.33G>T	p.(Gln11His)	0.00116467	0.000618279	0.000726917	0.00083662	3442
chr12:g.49580586C>T	EXON2	CAGGCTG	CAGACTG	G	A	NM_006009.3:c.34G>A	p.(Ala12Thr)	0.0048058	0.00250146	0.0031188	0.00347535	1041
chr12:g.49580586C>G	EXON2	CAGGCTG	CAGCCTG	G	C	NM_006009.3:c.34G>C	p.(Ala12Pro)	0.00273831	0.00147918	0.00179854	0.00200534	1780
chr12:g.49580586C>A	EXON2	CAGGCTG	CAGTCTG	G	T	NM_006009.3:c.34G>T	p.(Ala12Ser)	0.00245256	0.00125302	0.00153113	0.00174557	1973
chr12:g.49580585G>T	EXON2	AGGCTGG	AGGATGG	C	A	NM_006009.3:c.35C>A	p.(Ala12Asp)	0.00171464	0.000919033	0.00110343	0.0012457	2565
chr12:g.49580585G>C	EXON2	AGGCTGG	AGGGTGG	C	G	NM_006009.3:c.35C>G	p.(Ala12Gly)	0.00156146	0.000794116	0.00100826	0.00112128	2786
chr12:g.49580585G>A	EXON2	AGGCTGG	AGGTTGG	C	T	NM_006009.3:c.35C>T	p.(Ala12Val)	0.00411037	0.00237937	0.00265598	0.00304857	1267
chr12:g.49580584A>T	EXON2	GGCTGGT	GGCAGGT	T	A	NM_006009.3:c.36T>A	p.(=)	0.000865433	0.000477826	0.000547996	0.000630418	4029
chr12:g.49580584A>G	EXON2	GGCTGGT	GGCCGGT	T	C	NM_006009.3:c.36T>C	p.(=)	0.00239916	0.00140006	0.00160723	0.00180215	1933
chr12:g.49580584A>C	EXON2	GGCTGGT	GGCGGGT	T	G	NM_006009.3:c.36T>G	p.(=)	0.000708386	0.000387607	0.00044107	0.000512354	4325
chr12:g.49580583C>T	EXON2	GCTGGTG	GCTAGTG	G	A	NM_006009.3:c.37G>A	p.(Gly13Ser)	0.00558999	0.00280779	0.00334504	0.00391427	827
chr12:g.49580583C>G	EXON2	GCTGGTG	GCTCGTG	G	C	NM_006009.3:c.37G>C	p.(Gly13Arg)	0.0016949	0.000748316	0.000927401	0.00112354	2783
chr12:g.49580583C>A	EXON2	GCTGGTG	GCTTGTG	G	T	NM_006009.3:c.37G>T	p.(Gly13Cys)	0.00223216	0.00122161	0.00152222	0.00165866	2062
chr12:g.49580582C>T	EXON2	CTGGTGT	CTGATGT	G	A	NM_006009.3:c.38G>A	p.(Gly13Asp)	0.0070815	0.00354712	0.00451509	0.0050479	478
chr12:g.49580582C>G	EXON2	CTGGTGT	CTGCTGT	G	C	NM_006009.3:c.38G>C	p.(Gly13Ala)	0.00359806	0.00175127	0.00204421	0.00246451	1530
chr12:g.49580582C>A	EXON2	CTGGTGT	CTGTTGT	G	T	NM_006009.3:c.38G>T	p.(Gly13Val)	0.0034707	0.0017258	0.00199963	0.00239871	1557
chr12:g.49580581A>T	EXON2	TGGTGTC	TGGAGTC	T	A	NM_006009.3:c.39T>A	p.(=)	0.00127877	0.000778383	0.000992836	0.00101666	2992
chr12:g.49580581A>G	EXON2	TGGTGTC	TGGCGTC	T	C	NM_006009.3:c.39T>C	p.(=)	0.00482915	0.00262903	0.00299439	0.00348419	1036
chr12:g.49580581A>C	EXON2	TGGTGTC	TGGGGTC	T	G	NM_006009.3:c.39T>G	p.(=)	0.00137408	0.000873695	0.000969008	0.00107226	2871
chr12:g.49580580C>T	EXON2	GGTGTCC	GGTATCC	G	A	NM_006009.3:c.40G>A	p.(Val14Ile)	0.0070932	0.0035209	0.00425335	0.00495582	496
chr12:g.49580580C>G	EXON2	GGTGTCC	GGTCTCC	G	C	NM_006009.3:c.40G>C	p.(Val14Leu)	0.0011308	0.00073245	0.00080955	0.000890933	3300
chr12:g.49580580C>A	EXON2	GGTGTCC	GGTTTCC	G	T	NM_006009.3:c.40G>T	p.(Val14Phe)	0.0016705	0.0007967	0.0010537	0.00117363	2679
chr12:g.49580579A>T	EXON2	GTGTCCA	GTGACCA	T	A	NM_006009.3:c.41T>A	p.(Val14Asp)	0.0011783	0.000651529	0.000866395	0.00089874	3256
chr12:g.49580579A>G	EXON2	GTGTCCA	GTGCCCA	T	C	NM_006009.3:c.41T>C	p.(Val14Ala)	0.0047825	0.00273088	0.00319527	0.00356955	984
chr12:g.49580579A>C	EXON2	GTGTCCA	GTGGCCA	T	G	NM_006009.3:c.41T>G	p.(Val14Gly)	0.000935707	0.000457457	0.000575286	0.00065615	3952
chr12:g.49580578G>T	EXON2	TGTCCAG	TGTACAG	C	A	NM_006009.3:c.42C>A	p.(=)	0.00183953	0.000949822	0.00117826	0.00132254	2450
chr12:g.49580578G>C	EXON2	TGTCCAG	TGTGCAG	C	G	NM_006009.3:c.42C>G	p.(=)	0.00205594	0.000979879	0.0012504	0.00142874	2328
chr12:g.49580578G>A	EXON2	TGTCCAG	TGTTCAG	C	T	NM_006009.3:c.42C>T	p.(=)	0.00479119	0.0023445	0.00327628	0.00347066	1047
chr12:g.49580577G>T	EXON2	GTCCAGA	GTCAAGA	C	A	NM_006009.3:c.43C>A	p.(Gln15Lys)	0.000816312	0.000380945	0.000498857	0.000565371	4220
chr12:g.49580577G>C	EXON2	GTCCAGA	GTCGAGA	C	G	NM_006009.3:c.43C>G	p.(Gln15Glu)	0.000770961	0.000426296	0.000598629	0.000598629	4133
chr12:g.49580577G>A	EXON2	GTCCAGA	GTCTAGA	C	T	NM_006009.3:c.43C>T	p.(Gln15*)	0.0048888	0.00256685	0.00277546	0.00341037	1084
chr12:g.49580576T>G	EXON2	TCCAGAT	TCCCGAT	A	C	NM_006009.3:c.44A>C	p.(Gln15Pro)	0.000929892	0.000539937	0.000581932	0.00068392	3869
chr12:g.49580576T>C	EXON2	TCCAGAT	TCCGGAT	A	G	NM_006009.3:c.44A>G	p.(Gln15Arg)	0.00442149	0.0025497	0.00280167	0.00325762	1152
chr12:g.49580576T>A	EXON2	TCCAGAT	TCCTGAT	A	T	NM_006009.3:c.44A>T	p.(Gln15Leu)	0.000851901	0.000461946	0.000527939	0.000613929	4082
chr12:g.49580575C>T	EXON2	CCAGATT	CCAAATT	G	A	NM_006009.3:c.45G>A	p.(=)	0.00375565	0.00223978	0.00264195	0.00287913	1361
chr12:g.49580575C>G	EXON2	CCAGATT	CCACATT	G	C	NM_006009.3:c.45G>C	p.(Gln15His)	0.0028585	0.00139832	0.00165199	0.0019696	1806
chr12:g.49580575C>A	EXON2	CCAGATT	CCATATT	G	T	NM_006009.3:c.45G>T	p.(Gln15His)	0.00269764	0.00139213	0.0016953	0.00192836	1835
chr12:g.49580574T>G	EXON2	CAGATTG	CAGCTTG	A	C	NM_006009.3:c.46A>C	p.(Ile16Leu)	0.000895599	0.000564453	0.000707448	0.0007225	3754
chr12:g.49580574T>C	EXON2	CAGATTG	CAGGTTG	A	G	NM_006009.3:c.46A>G	p.(Ile16Val)	0.00439521	0.00273195	0.00288247	0.00333654	1113
chr12:g.49580574T>A	EXON2	CAGATTG	CAGTTTG	A	T	NM_006009.3:c.46A>T	p.(Ile16Phe)	0.00189656	0.00120417	0.00136974	0.00149016	2241
chr12:g.49580573A>T	EXON2	AGATTGG	AGAATGG	T	A	NM_006009.3:c.47T>A	p.(Ile16Asn)	0.00118439	0.000757368	0.000733197	0.000891653	3294
chr12:g.49580573A>G	EXON2	AGATTGG	AGACTGG	T	C	NM_006009.3:c.47T>C	p.(Ile16Thr)	0.0238813	0.0126013	0.0138421	0.0167749	76
chr12:g.49580573A>C	EXON2	AGATTGG	AGAGTGG	T	G	NM_006009.3:c.47T>G	p.(Ile16Ser)	0.0010716	0.000580112	0.000692911	0.000781539	3596
chr12:g.49580572A>T	EXON2	GATTGGC	GATAGGC	T	A	NM_006009.3:c.48T>A	p.(=)	0.0011584	0.000827429	0.000661943	0.000882591	3329
chr12:g.49580572A>G	EXON2	GATTGGC	GATCGGC	T	C	NM_006009.3:c.48T>C	p.(=)	0.00367077	0.00213627	0.00239202	0.00273302	1426
chr12:g.49580572A>C	EXON2	GATTGGC	GATGGGC	T	G	NM_006009.3:c.48T>G	p.(Ile16Met)	0.00189556	0.001023	0.00108318	0.00133391	2432
chr12:g.49580571C>T	EXON2	ATTGGCA	ATTAGCA	G	A	NM_006009.3:c.49G>A	p.(Gly17Ser)	0.00436103	0.00222123	0.00254702	0.00304309	1271
chr12:g.49580571C>G	EXON2	ATTGGCA	ATTCGCA	G	C	NM_006009.3:c.49G>C	p.(Gly17Arg)	0.000651562	0.000340589	0.000562713	0.000518288	4309
chr12:g.49580571C>A	EXON2	ATTGGCA	ATTTGCA	G	T	NM_006009.3:c.49G>T	p.(Gly17Cys)	0.00159188	0.000947727	0.00116985	0.00123649	2584
chr12:g.49580570C>T	EXON2	TTGGCAA	TTGACAA	G	A	NM_006009.3:c.50G>A	p.(Gly17Asp)	0.00782951	0.0039962	0.00500611	0.00561061	351
chr12:g.49580570C>G	EXON2	TTGGCAA	TTGCCAA	G	C	NM_006009.3:c.50G>C	p.(Gly17Ala)	0.0012651	0.000678702	0.000749287	0.000897697	3260
chr12:g.49580570C>A	EXON2	TTGGCAA	TTGTCAA	G	T	NM_006009.3:c.50G>T	p.(Gly17Val)	0.00242704	0.00146057	0.0015583	0.0018153	1920
chr12:g.49580569G>T	EXON2	TGGCAAT	TGGAAAT	C	A	NM_006009.3:c.51C>A	p.(=)	0.00344973	0.00174601	0.00191518	0.00237031	1574
chr12:g.49580569G>C	EXON2	TGGCAAT	TGGGAAT	C	G	NM_006009.3:c.51C>G	p.(=)	0.00112977	0.000682697	0.000688739	0.000833736	3448
chr12:g.49580569G>A	EXON2	TGGCAAT	TGGTAAT	C	T	NM_006009.3:c.51C>T	p.(=)	0.00519575	0.00309932	0.00326849	0.00385452	851
chr12:g.49580568T>G	EXON2	GGCAATG	GGCCATG	A	C	NM_006009.3:c.52A>C	p.(Asn18His)	0.00105432	0.000634176	0.000729302	0.000805932	3530
chr12:g.49580568T>C	EXON2	GGCAATG	GGCGATG	A	G	NM_006009.3:c.52A>G	p.(Asn18Asp)	0.00393982	0.00241779	0.00287757	0.00307839	1244
chr12:g.49580568T>A	EXON2	GGCAATG	GGCTATG	A	T	NM_006009.3:c.52A>T	p.(Asn18Tyr)	0.000665885	0.000404287	0.000372578	0.000480917	4371
chr12:g.49580567T>G	EXON2	GCAATGC	GCACTGC	A	C	NM_006009.3:c.53A>C	p.(Asn18Thr)	0.000770058	0.000327011	0.000474694	0.000523921	4295
chr12:g.49580567T>C	EXON2	GCAATGC	GCAGTGC	A	G	NM_006009.3:c.53A>G	p.(Asn18Ser)	0.0101901	0.00512669	0.00581236	0.00704305	164
chr12:g.49580567T>A	EXON2	GCAATGC	GCATTGC	A	T	NM_006009.3:c.53A>T	p.(Asn18Ile)	0.00107597	0.000622376	0.00067512	0.000791156	3566
chr12:g.49580566A>T	EXON2	CAATGCC	CAAAGCC	T	A	NM_006009.3:c.54T>A	p.(Asn18Lys)	0.00165134	0.00103417	0.00108421	0.00125657	2546
chr12:g.49580566A>G	EXON2	CAATGCC	CAACGCC	T	C	NM_006009.3:c.54T>C	p.(=)	0.0067638	0.00425344	0.00477886	0.00526537	429
chr12:g.49580566A>C	EXON2	CAATGCC	CAAGGCC	T	G	NM_006009.3:c.54T>G	p.(Asn18Lys)	0.000984129	0.000583805	0.000667206	0.000745047	3702
chr12:g.49580565C>T	EXON2	AATGCCT	AATACCT	G	A	NM_006009.3:c.55G>A	p.(Ala19Thr)	0.00685724	0.0037727	0.00423636	0.00495543	498
chr12:g.49580565C>G	EXON2	AATGCCT	AATCCCT	G	C	NM_006009.3:c.55G>C	p.(Ala19Pro)	0.00103957	0.000536866	0.000678403	0.000751612	3677
chr12:g.49580565C>A	EXON2	AATGCCT	AATTCCT	G	T	NM_006009.3:c.55G>T	p.(Ala19Ser)	0.00223531	0.00107861	0.00133728	0.0015504	2176
chr12:g.49580564G>T	EXON2	ATGCCTG	ATGACTG	C	A	NM_006009.3:c.56C>A	p.(Ala19Asp)	0.00318511	0.00172129	0.00195562	0.00228734	1620
chr12:g.49580564G>C	EXON2	ATGCCTG	ATGGCTG	C	G	NM_006009.3:c.56C>G	p.(Ala19Gly)	0.00208001	0.0011051	0.00135389	0.001513	2213
chr12:g.49580564G>A	EXON2	ATGCCTG	ATGTCTG	C	T	NM_006009.3:c.56C>T	p.(Ala19Val)	0.00872217	0.00438857	0.00559202	0.00623425	230
chr12:g.49580563G>T	EXON2	TGCCTGC	TGCATGC	C	A	NM_006009.3:c.57C>A	p.(=)	0.0010151	0.000653958	0.000732043	0.000800367	3548
chr12:g.49580563G>C	EXON2	TGCCTGC	TGCGTGC	C	G	NM_006009.3:c.57C>G	p.(=)	0.00138112	0.000761325	0.000878452	0.00100697	3008
chr12:g.49580563G>A	EXON2	TGCCTGC	TGCTTGC	C	T	NM_006009.3:c.57C>T	p.(=)	0.00490469	0.00255727	0.00307458	0.00351218	1018
chr12:g.49580562A>T	EXON2	GCCTGCT	GCCAGCT	T	A	NM_006009.3:c.58T>A	p.(Cys20Ser)	0.000977075	0.000546012	0.000546012	0.0006897	3844
chr12:g.49580562A>G	EXON2	GCCTGCT	GCCCGCT	T	C	NM_006009.3:c.58T>C	p.(Cys20Arg)	0.0036784	0.00211221	0.00245706	0.00274922	1421
chr12:g.49580562A>C	EXON2	GCCTGCT	GCCGGCT	T	G	NM_006009.3:c.58T>G	p.(Cys20Gly)	0.0011495	0.000610672	0.000696884	0.000819019	3498
chr12:g.49580561C>T	EXON2	CCTGCTG	CCTACTG	G	A	NM_006009.3:c.59G>A	p.(Cys20Tyr)	0.00473054	0.00252233	0.00295834	0.00340374	1085
chr12:g.49580561C>G	EXON2	CCTGCTG	CCTCCTG	G	C	NM_006009.3:c.59G>C	p.(Cys20Ser)	0.00242387	0.00132211	0.00151433	0.00175344	1966
chr12:g.49580561C>A	EXON2	CCTGCTG	CCTTCTG	G	T	NM_006009.3:c.59G>T	p.(Cys20Phe)	0.0021707	0.00110176	0.00144401	0.00157216	2149
chr12:g.49580560G>T	EXON2	CTGCTGG	CTGATGG	C	A	NM_006009.3:c.60C>A	p.(Cys20*)	0.00134832	0.000794215	0.000881948	0.00100816	3005
chr12:g.49580560G>C	EXON2	CTGCTGG	CTGGTGG	C	G	NM_006009.3:c.60C>G	p.(Cys20Trp)	0.0012375	0.00074804	0.000891183	0.000958907	3098
chr12:g.49580560G>A	EXON2	CTGCTGG	CTGTTGG	C	T	NM_006009.3:c.60C>T	p.(=)	0.00510237	0.0026874	0.00325998	0.00368325	933
chr12:g.49580559A>T	EXON2	TGCTGGG	TGCAGGG	T	A	NM_006009.3:c.61T>A	p.(Trp21Arg)	0.000706053	0.00034508	0.00042908	0.000493404	4357
chr12:g.49580559A>G	EXON2	TGCTGGG	TGCCGGG	T	C	NM_006009.3:c.61T>C	p.(Trp21Arg)	0.00321924	0.00186843	0.00213632	0.002408	1554
chr12:g.49580559A>C	EXON2	TGCTGGG	TGCGGGG	T	G	NM_006009.3:c.61T>G	p.(Trp21Gly)	0.000746918	0.000379134	0.000465405	0.000530486	4290
chr12:g.49580558C>T	EXON2	GCTGGGA	GCTAGGA	G	A	NM_006009.3:c.62G>A	p.(Trp21*)	0.00501697	0.00247107	0.00296131	0.00348311	1037
chr12:g.49580558C>G	EXON2	GCTGGGA	GCTCGGA	G	C	NM_006009.3:c.62G>C	p.(Trp21Ser)	0.000740709	0.000342101	0.000410826	0.000497879	4353
chr12:g.49580558C>A	EXON2	GCTGGGA	GCTTGGA	G	T	NM_006009.3:c.62G>T	p.(Trp21Leu)	0.00122942	0.000577295	0.000746818	0.000851179	3403
chr12:g.49580557C>T	EXON2	CTGGGAG	CTGAGAG	G	A	NM_006009.3:c.63G>A	p.(Trp21*)	0.00534638	0.00270842	0.0035234	0.0038594	849
chr12:g.49580557C>G	EXON2	CTGGGAG	CTGCGAG	G	C	NM_006009.3:c.63G>C	p.(Trp21Cys)	0.00127149	0.000686298	0.000799659	0.000919149	3200
chr12:g.49580557C>A	EXON2	CTGGGAG	CTGTGAG	G	T	NM_006009.3:c.63G>T	p.(Trp21Cys)	0.00119183	0.000726127	0.000796595	0.00090485	3240
chr12:g.49580556C>T	EXON2	TGGGAGC	TGGAAGC	G	A	NM_006009.3:c.64G>A	p.(Glu22Lys)	0.00599042	0.00285053	0.00415574	0.00433223	687
chr12:g.49580556C>G	EXON2	TGGGAGC	TGGCAGC	G	C	NM_006009.3:c.64G>C	p.(Glu22Gln)	0.00172386	0.00100969	0.00107126	0.00126827	2527
chr12:g.49580556C>A	EXON2	TGGGAGC	TGGTAGC	G	T	NM_006009.3:c.64G>T	p.(Glu22*)	0.00134215	0.000708015	0.000634135	0.000894767	3279
chr12:g.49580555T>G	EXON2	GGGAGCT	GGGCGCT	A	C	NM_006009.3:c.65A>C	p.(Glu22Ala)	0.000756657	0.000538521	0.000579422	0.000624867	4043
chr12:g.49580555T>C	EXON2	GGGAGCT	GGGGGCT	A	G	NM_006009.3:c.65A>G	p.(Glu22Gly)	0.00251537	0.0015474	0.00184733	0.00197003	1805
chr12:g.49580555T>A	EXON2	GGGAGCT	GGGTGCT	A	T	NM_006009.3:c.65A>T	p.(Glu22Val)	0.00119293	0.000620322	0.000695306	0.000836185	3445
chr12:g.49580554C>T	EXON2	GGAGCTC	GGAACTC	G	A	NM_006009.3:c.66G>A	p.(=)	0.00748803	0.00393557	0.00487592	0.00543317	392
chr12:g.49580554C>G	EXON2	GGAGCTC	GGACCTC	G	C	NM_006009.3:c.66G>C	p.(Glu22Asp)	0.00185459	0.000835873	0.000992599	0.00122769	2600
chr12:g.49580554C>A	EXON2	GGAGCTC	GGATCTC	G	T	NM_006009.3:c.66G>T	p.(Glu22Asp)	0.00205485	0.00106226	0.00127993	0.00146568	2274
chr12:g.49580553G>T	EXON2	GAGCTCT	GAGATCT	C	A	NM_006009.3:c.67C>A	p.(Leu23Ile)	0.00218651	0.00109326	0.00137358	0.00155112	2175
chr12:g.49580553G>C	EXON2	GAGCTCT	GAGGTCT	C	G	NM_006009.3:c.67C>G	p.(Leu23Val)	0.00205336	0.00100916	0.00128948	0.00145067	2295
chr12:g.49580553G>A	EXON2	GAGCTCT	GAGTTCT	C	T	NM_006009.3:c.67C>T	p.(Leu23Phe)	0.00716223	0.00385443	0.00462531	0.00521399	439
chr12:g.49580552A>T	EXON2	AGCTCTA	AGCACTA	T	A	NM_006009.3:c.68T>A	p.(Leu23His)	0.000741161	0.000427257	0.000540611	0.000569676	4197
chr12:g.49580552A>G	EXON2	AGCTCTA	AGCCCTA	T	C	NM_006009.3:c.68T>C	p.(Leu23Pro)	0.00269434	0.00154336	0.00182238	0.00202003	1773
chr12:g.49580552A>C	EXON2	AGCTCTA	AGCGCTA	T	G	NM_006009.3:c.68T>G	p.(Leu23Arg)	0.00128177	0.000653965	0.000715002	0.00088358	3324
chr12:g.49580551G>T	EXON2	GCTCTAC	GCTATAC	C	A	NM_006009.3:c.69C>A	p.(=)	0.000974627	0.00060102	0.000714727	0.000763458	3654
chr12:g.49580551G>C	EXON2	GCTCTAC	GCTGTAC	C	G	NM_006009.3:c.69C>G	p.(=)	0.00518177	0.0027452	0.00344368	0.00379022	882
chr12:g.49580551G>A	EXON2	GCTCTAC	GCTTTAC	C	T	NM_006009.3:c.69C>T	p.(=)	0.0049706	0.00266398	0.00297261	0.00353573	1009
chr12:g.49580550A>T	EXON2	CTCTACT	CTCAACT	T	A	NM_006009.3:c.70T>A	p.(Tyr24Asn)	0.000591313	0.000303396	0.00036841	0.00042104	4460
chr12:g.49580550A>G	EXON2	CTCTACT	CTCCACT	T	C	NM_006009.3:c.70T>C	p.(Tyr24His)	0.00440853	0.00254791	0.00290393	0.00328679	1138
chr12:g.49580550A>C	EXON2	CTCTACT	CTCGACT	T	G	NM_006009.3:c.70T>G	p.(Tyr24Asp)	0.000337451	0.000188849	0.000216712	0.000247671	4548
chr12:g.49580549T>G	EXON2	TCTACTG	TCTCCTG	A	C	NM_006009.3:c.71A>C	p.(Tyr24Ser)	0.00174712	0.00118658	0.00119386	0.00137586	2393
chr12:g.49580549T>C	EXON2	TCTACTG	TCTGCTG	A	G	NM_006009.3:c.71A>G	p.(Tyr24Cys)	0.00766548	0.00432412	0.00496473	0.00565144	339
chr12:g.49580549T>A	EXON2	TCTACTG	TCTTCTG	A	T	NM_006009.3:c.71A>T	p.(Tyr24Phe)	0.000990034	0.000582373	0.000553254	0.000708554	3793
chr12:g.49580548G>T	EXON2	CTACTGC	CTAATGC	C	A	NM_006009.3:c.72C>A	p.(Tyr24*)	0.00126329	0.000772588	0.000856111	0.000963995	3085
chr12:g.49580548G>C	EXON2	CTACTGC	CTAGTGC	C	G	NM_006009.3:c.72C>G	p.(Tyr24*)	0.00152429	0.000887432	0.00114844	0.00118672	2656
chr12:g.49580548G>A	EXON2	CTACTGC	CTATTGC	C	T	NM_006009.3:c.72C>T	p.(=)	0.00776764	0.00435364	0.00539767	0.00583965	300
chr12:g.49580547A>T	EXON2	TACTGCC	TACAGCC	T	A	NM_006009.3:c.73T>A	p.(Cys25Ser)	0.00106376	0.000600341	0.000674067	0.00077939	3608
chr12:g.49580547A>G	EXON2	TACTGCC	TACCGCC	T	C	NM_006009.3:c.73T>C	p.(Cys25Arg)	0.00456049	0.00251722	0.00278053	0.00328608	1139
chr12:g.49580547A>C	EXON2	TACTGCC	TACGGCC	T	G	NM_006009.3:c.73T>G	p.(Cys25Gly)	0.00131654	0.000758326	0.000695132	0.000923332	3186
chr12:g.49580546C>T	EXON2	ACTGCCT	ACTACCT	G	A	NM_006009.3:c.74G>A	p.(Cys25Tyr)	0.00528873	0.00309296	0.00331726	0.00389965	836
chr12:g.49580546C>G	EXON2	ACTGCCT	ACTCCCT	G	C	NM_006009.3:c.74G>C	p.(Cys25Ser)	0.00173536	0.00105066	0.00116871	0.00131825	2461
chr12:g.49580546C>A	EXON2	ACTGCCT	ACTTCCT	G	T	NM_006009.3:c.74G>T	p.(Cys25Phe)	0.00267388	0.00146975	0.00166453	0.00193605	1829
chr12:g.49580545G>T	EXON2	CTGCCTG	CTGACTG	C	A	NM_006009.3:c.75C>A	p.(Cys25*)	0.0021863	0.00120032	0.00133964	0.00157542	2145
chr12:g.49580545G>C	EXON2	CTGCCTG	CTGGCTG	C	G	NM_006009.3:c.75C>G	p.(Cys25Trp)	0.001086	0.000625167	0.000700188	0.000803787	3535
chr12:g.49580545G>A	EXON2	CTGCCTG	CTGTCTG	C	T	NM_006009.3:c.75C>T	p.(=)	0.00759489	0.00401893	0.00493704	0.00551695	372
chr12:g.49580544G>T	EXON2	TGCCTGG	TGCATGG	C	A	NM_006009.3:c.76C>A	p.(Leu26Met)	0.00122484	0.000669942	0.000822201	0.000905662	3234
chr12:g.49580544G>C	EXON2	TGCCTGG	TGCGTGG	C	G	NM_006009.3:c.76C>G	p.(Leu26Val)	0.0016038	0.000713928	0.00103536	0.0011177	2792
chr12:g.49580544G>A	EXON2	TGCCTGG	TGCTTGG	C	T	NM_006009.3:c.76C>T	p.(=)	0.0047911	0.00246322	0.00302489	0.0034264	1071
chr12:g.49580543A>T	EXON2	GCCTGGA	GCCAGGA	T	A	NM_006009.3:c.77T>A	p.(Leu26Gln)	0.000833211	0.000414081	0.000540325	0.000595872	4140
chr12:g.49580543A>G	EXON2	GCCTGGA	GCCCGGA	T	C	NM_006009.3:c.77T>C	p.(Leu26Pro)	0.00401961	0.00236834	0.00285817	0.00308204	1240
chr12:g.49580543A>C	EXON2	GCCTGGA	GCCGGGA	T	G	NM_006009.3:c.77T>G	p.(Leu26Arg)	0.000934207	0.000520126	0.000605972	0.000686768	3852
chr12:g.49580542C>T	EXON2	CCTGGAA	CCTAGAA	G	A	NM_006009.3:c.78G>A	p.(=)	0.00559124	0.00295479	0.00344453	0.00399685	799
chr12:g.49580542C>G	EXON2	CCTGGAA	CCTCGAA	G	C	NM_006009.3:c.78G>C	p.(=)	0.000710129	0.000334658	0.000432607	0.000492465	4358
chr12:g.49580542C>A	EXON2	CCTGGAA	CCTTGAA	G	T	NM_006009.3:c.78G>T	p.(=)	0.000865214	0.00044077	0.000530556	0.00061218	4090
chr12:g.49580541C>T	EXON2	CTGGAAC	CTGAAAC	G	A	NM_006009.3:c.79G>A	p.(Glu27Lys)	0.00480663	0.00236744	0.00358051	0.00358486	978
chr12:g.49580541C>G	EXON2	CTGGAAC	CTGCAAC	G	C	NM_006009.3:c.79G>C	p.(Glu27Gln)	0.00286311	0.00158482	0.00165656	0.00203483	1761
chr12:g.49580541C>A	EXON2	CTGGAAC	CTGTAAC	G	T	NM_006009.3:c.79G>T	p.(Glu27*)	0.0014609	0.000860888	0.000821757	0.00104785	2931
chr12:g.49580540T>G	EXON2	TGGAACA	TGGCACA	A	C	NM_006009.3:c.80A>C	p.(Glu27Ala)	0.000820107	0.000505066	0.000545071	0.000623415	4050
chr12:g.49580540T>C	EXON2	TGGAACA	TGGGACA	A	G	NM_006009.3:c.80A>G	p.(Glu27Gly)	0.00277036	0.00168522	0.00187024	0.00210861	1719
chr12:g.49580540T>A	EXON2	TGGAACA	TGGTACA	A	T	NM_006009.3:c.80A>T	p.(Glu27Val)	0.000880114	0.000515067	0.000565073	0.000653418	3962
chr12:g.49580539T>G	EXON2	GGAACAC	GGACCAC	A	C	NM_006009.3:c.81A>C	p.(Glu27Asp)	0.000882796	0.000591307	0.000599635	0.000691246	3841
chr12:g.49580539T>C	EXON2	GGAACAC	GGAGCAC	A	G	NM_006009.3:c.81A>G	p.(=)	0.00432237	0.00242353	0.0030648	0.00327023	1145
chr12:g.49580539T>A	EXON2	GGAACAC	GGATCAC	A	T	NM_006009.3:c.81A>T	p.(Glu27Asp)	0.001649	0.000957751	0.00107435	0.00122703	2602
chr12:g.49580538G>T	EXON2	GAACACG	GAAAACG	C	A	NM_006009.3:c.82C>A	p.(His28Asn)	0.00191003	0.00136431	0.00132533	0.00153322	2198
chr12:g.49580538G>C	EXON2	GAACACG	GAAGACG	C	G	NM_006009.3:c.82C>G	p.(His28Asp)	0.00159819	0.000974507	0.000935527	0.00116941	2690
chr12:g.49580538G>A	EXON2	GAACACG	GAATACG	C	T	NM_006009.3:c.82C>T	p.(His28Tyr)	0.00635378	0.00370313	0.00382007	0.00462566	596
chr12:g.49580537T>G	EXON2	AACACGG	AACCCGG	A	C	NM_006009.3:c.83A>C	p.(His28Pro)	0.0014607	0.000903325	0.00105708	0.00114037	2752
chr12:g.49580537T>C	EXON2	AACACGG	AACGCGG	A	G	NM_006009.3:c.83A>G	p.(His28Arg)	0.00403613	0.00240246	0.00265232	0.0030303	1283
chr12:g.49580537T>A	EXON2	AACACGG	AACTCGG	A	T	NM_006009.3:c.83A>T	p.(His28Leu)	0.000788007	0.000461272	0.000711128	0.000653469	3961
chr12:g.49580536G>T	EXON2	ACACGGC	ACAAGGC	C	A	NM_006009.3:c.84C>A	p.(His28Gln)	0.00599297	0.00369132	0.00473357	0.00480595	539
chr12:g.49580536G>C	EXON2	ACACGGC	ACAGGGC	C	G	NM_006009.3:c.84C>G	p.(His28Gln)	0.0057324	0.00377817	0.00412559	0.00454539	620
chr12:g.49580536G>A	EXON2	ACACGGC	ACATGGC	C	T	NM_006009.3:c.84C>T	p.(=)	0.113475	0.0661832	0.0787771	0.0861452	5
chr12:g.49580535C>T	EXON2	CACGGCA	CACAGCA	G	A	NM_006009.3:c.85G>A	p.(Gly29Ser)	0.0763197	0.0435209	0.051428	0.0570895	46
chr12:g.49580535C>G	EXON2	CACGGCA	CACCGCA	G	C	NM_006009.3:c.85G>C	p.(Gly29Arg)	0.00493405	0.00325774	0.00322611	0.00380597	872
chr12:g.49580535C>A	EXON2	CACGGCA	CACTGCA	G	T	NM_006009.3:c.85G>T	p.(Gly29Cys)	0.0084132	0.00616757	0.0064206	0.00700045	169
chr12:g.49580534C>T	EXON2	ACGGCAT	ACGACAT	G	A	NM_006009.3:c.86G>A	p.(Gly29Asp)	0.0102706	0.00534069	0.0068666	0.00749262	135
chr12:g.49580534C>G	EXON2	ACGGCAT	ACGCCAT	G	C	NM_006009.3:c.86G>C	p.(Gly29Ala)	0.00193673	0.0010564	0.00146722	0.00148679	2247
chr12:g.49580534C>A	EXON2	ACGGCAT	ACGTCAT	G	T	NM_006009.3:c.86G>T	p.(Gly29Val)	0.002641	0.00123247	0.00170198	0.00185848	1885
chr12:g.49580533G>T	EXON2	CGGCATC	CGGAATC	C	A	NM_006009.3:c.87C>A	p.(=)	0.00136019	0.00110111	0.00123065	0.00123065	2597
chr12:g.49580533G>C	EXON2	CGGCATC	CGGGATC	C	G	NM_006009.3:c.87C>G	p.(=)	0.00110111	0.000777252	0.000712481	0.000863614	3366
chr12:g.49580533G>A	EXON2	CGGCATC	CGGTATC	C	T	NM_006009.3:c.87C>T	p.(=)	0.00485783	0.00252607	0.00323855	0.00354082	1006
chr12:g.49580532T>G	EXON2	GGCATCC	GGCCTCC	A	C	NM_006009.3:c.88A>C	p.(Ile30Leu)	0.00199616	0.00141804	0.00145076	0.00162165	2086
chr12:g.49580532T>C	EXON2	GGCATCC	GGCGTCC	A	G	NM_006009.3:c.88A>G	p.(Ile30Val)	0.00550853	0.00366508	0.00391597	0.00436319	681
chr12:g.49580532T>A	EXON2	GGCATCC	GGCTTCC	A	T	NM_006009.3:c.88A>T	p.(Ile30Phe)	0.00165801	0.0010908	0.00115625	0.00130169	2477
chr12:g.49580531A>T	EXON2	GCATCCA	GCAACCA	T	A	NM_006009.3:c.89T>A	p.(Ile30Asn)	0.0024716	0.0013779	0.0016018	0.0018171	1917
chr12:g.49580531A>G	EXON2	GCATCCA	GCACCCA	T	C	NM_006009.3:c.89T>C	p.(Ile30Thr)	0.00469346	0.00277302	0.00302276	0.00349641	1030
chr12:g.49580531A>C	EXON2	GCATCCA	GCAGCCA	T	G	NM_006009.3:c.89T>G	p.(Ile30Ser)	0.00143818	0.00083535	0.00106787	0.0011138	2800
chr12:g.49580530G>T	EXON2	CATCCAG	CATACAG	C	A	NM_006009.3:c.90C>A	p.(=)	0.00210464	0.00114633	0.0014132	0.00155472	2163
chr12:g.49580530G>C	EXON2	CATCCAG	CATGCAG	C	G	NM_006009.3:c.90C>G	p.(Ile30Met)	0.00203792	0.0011342	0.00136468	0.00151227	2215
chr12:g.49580530G>A	EXON2	CATCCAG	CATTCAG	C	T	NM_006009.3:c.90C>T	p.(=)	0.0046581	0.00220775	0.00308114	0.00331566	1120
chr12:g.49580529G>T	EXON2	ATCCAGC	ATCAAGC	C	A	NM_006009.3:c.91C>A	p.(Gln31Lys)	0.00107457	0.000718707	0.000648929	0.000814069	3512
chr12:g.49580529G>C	EXON2	ATCCAGC	ATCGAGC	C	G	NM_006009.3:c.91C>G	p.(Gln31Glu)	0.000823373	0.000404709	0.000537286	0.000588456	4160
chr12:g.49580529G>A	EXON2	ATCCAGC	ATCTAGC	C	T	NM_006009.3:c.91C>T	p.(Gln31*)	0.00540774	0.00282598	0.0031958	0.00380984	870
chr12:g.49580528T>G	EXON2	TCCAGCC	TCCCGCC	A	C	NM_006009.3:c.92A>C	p.(Gln31Pro)	0.000804164	0.000419873	0.00049341	0.000572482	4192
chr12:g.49580528T>C	EXON2	TCCAGCC	TCCGGCC	A	G	NM_006009.3:c.92A>G	p.(Gln31Arg)	0.0026165	0.00155851	0.00187875	0.00201792	1774
chr12:g.49580528T>A	EXON2	TCCAGCC	TCCTGCC	A	T	NM_006009.3:c.92A>T	p.(Gln31Leu)	0.000792303	0.000443595	0.000555086	0.000596995	4136
chr12:g.49580527C>T	EXON2	CCAGCCC	CCAACCC	G	A	NM_006009.3:c.93G>A	p.(=)	0.00474471	0.00290036	0.00308528	0.00357678	981
chr12:g.49580527C>G	EXON2	CCAGCCC	CCACCCC	G	C	NM_006009.3:c.93G>C	p.(Gln31His)	0.00145991	0.000866214	0.0010122	0.00111278	2804
chr12:g.49580527C>A	EXON2	CCAGCCC	CCATCCC	G	T	NM_006009.3:c.93G>T	p.(Gln31His)	0.00179082	0.00100734	0.00104627	0.00128148	2513
chr12:g.49580526G>T	EXON2	CAGCCCG	CAGACCG	C	A	NM_006009.3:c.94C>A	p.(Pro32Thr)	0.00203762	0.00144701	0.00156513	0.00168325	2038
chr12:g.49580526G>C	EXON2	CAGCCCG	CAGGCCG	C	G	NM_006009.3:c.94C>G	p.(Pro32Ala)	0.00177184	0.000944984	0.00112217	0.00127967	2516
chr12:g.49580526G>A	EXON2	CAGCCCG	CAGTCCG	C	T	NM_006009.3:c.94C>T	p.(Pro32Ser)	0.00546319	0.00342557	0.00445914	0.0044493	654
chr12:g.49580525G>T	EXON2	AGCCCGA	AGCACGA	C	A	NM_006009.3:c.95C>A	p.(Pro32His)	0.00138849	0.00109922	0.000983512	0.00115707	2719
chr12:g.49580525G>C	EXON2	AGCCCGA	AGCGCGA	C	G	NM_006009.3:c.95C>G	p.(Pro32Arg)	0.00121493	0.000809951	0.000867804	0.000964227	3083
chr12:g.49580525G>A	EXON2	AGCCCGA	AGCTCGA	C	T	NM_006009.3:c.95C>T	p.(Pro32Leu)	0.00358692	0.00144634	0.00214058	0.00239128	1564
chr12:g.49580524G>T	EXON2	GCCCGAT	GCCAGAT	C	A	NM_006009.3:c.96C>A	p.(=)	0.00371195	0.00254534	0.00318167	0.00314632	1212
chr12:g.49580524G>C	EXON2	GCCCGAT	GCCGGAT	C	G	NM_006009.3:c.96C>G	p.(=)	0.00636335	0.00403012	0.0045604	0.00498462	488
chr12:g.49580524G>A	EXON2	GCCCGAT	GCCTGAT	C	T	NM_006009.3:c.96C>T	p.(=)	0.081663	0.0445434	0.0522855	0.0594973	41
chr12:g.49580523C>T	EXON2	CCCGATG	CCCAATG	G	A	NM_006009.3:c.97G>A	p.(Asp33Asn)	0.0758534	0.0428193	0.0502501	0.0563076	49
chr12:g.49580523C>G	EXON2	CCCGATG	CCCCATG	G	C	NM_006009.3:c.97G>C	p.(Asp33His)	0.00573867	0.00360506	0.00382578	0.00438984	669
chr12:g.49580523C>A	EXON2	CCCGATG	CCCTATG	G	T	NM_006009.3:c.97G>T	p.(Asp33Tyr)	0.00456151	0.0024279	0.00353149	0.00350696	1023
chr12:g.49580522T>G	EXON2	CCGATGG	CCGCTGG	A	C	NM_006009.3:c.98A>C	p.(Asp33Ala)	0.00118915	0.00081754	0.000966184	0.000990958	3034
chr12:g.49580522T>C	EXON2	CCGATGG	CCGGTGG	A	G	NM_006009.3:c.98A>G	p.(Asp33Gly)	0.00468227	0.00252694	0.00274991	0.00331971	1119
chr12:g.49580522T>A	EXON2	CCGATGG	CCGTTGG	A	T	NM_006009.3:c.98A>T	p.(Asp33Val)	0.00200669	0.00118915	0.00133779	0.00151121	2217
chr12:g.49580521A>T	EXON2	CGATGGC	CGAAGGC	T	A	NM_006009.3:c.99T>A	p.(Asp33Glu)	0.00215599	0.00156309	0.00102409	0.00158106	2139
chr12:g.49580521A>G	EXON2	CGATGGC	CGACGGC	T	C	NM_006009.3:c.99T>C	p.(=)	0.00937854	0.00630626	0.00673745	0.00747408	136
chr12:g.49580521A>C	EXON2	CGATGGC	CGAGGGC	T	G	NM_006009.3:c.99T>G	p.(Asp33Glu)	0.000916294	0.000431197	0.000485097	0.000610863	4096
chr12:g.49580520C>T	EXON2	GATGGCC	GATAGCC	G	A	NM_006009.3:c.100G>A	p.(Gly34Ser)	0.00523729	0.0024633	0.00317344	0.00362468	958
chr12:g.49580520C>G	EXON2	GATGGCC	GATCGCC	G	C	NM_006009.3:c.100G>C	p.(Gly34Arg)	0.000532605	0.000399454	0.000432742	0.000454934	4417
chr12:g.49580520C>A	EXON2	GATGGCC	GATTGCC	G	T	NM_006009.3:c.100G>T	p.(Gly34Cys)	0.00103192	0.000610277	0.000687949	0.000776716	3626
chr12:g.49580519C>T	EXON2	ATGGCCA	ATGACCA	G	A	NM_006009.3:c.101G>A	p.(Gly34Asp)	0.00796071	0.00412935	0.00466148	0.00558385	361
chr12:g.49580519C>G	EXON2	ATGGCCA	ATGCCCA	G	C	NM_006009.3:c.101G>C	p.(Gly34Ala)	0.00118666	0.000734343	0.000819485	0.000913495	3221
chr12:g.49580519C>A	EXON2	ATGGCCA	ATGTCCA	G	T	NM_006009.3:c.101G>T	p.(Gly34Val)	0.00230946	0.00130372	0.00153786	0.00171702	2001
chr12:g.49580518G>T	EXON2	TGGCCAG	TGGACAG	C	A	NM_006009.3:c.102C>A	p.(=)	0.00186454	0.000961961	0.00122027	0.00134892	2425
chr12:g.49580518G>C	EXON2	TGGCCAG	TGGGCAG	C	G	NM_006009.3:c.102C>G	p.(=)	0.00118464	0.000587865	0.000703657	0.000825386	3481
chr12:g.49580518G>A	EXON2	TGGCCAG	TGGTCAG	C	T	NM_006009.3:c.102C>T	p.(=)	0.00599147	0.00296308	0.00385081	0.00426845	702
chr12:g.49580517G>T	EXON2	GGCCAGA	GGCAAGA	C	A	NM_006009.3:c.103C>A	p.(Gln35Lys)	0.00114161	0.000699696	0.000748797	0.000863367	3370
chr12:g.49580517G>C	EXON2	GGCCAGA	GGCGAGA	C	G	NM_006009.3:c.103C>G	p.(Gln35Glu)	0.00100658	0.000466464	0.00068742	0.000720155	3763
chr12:g.49580517G>A	EXON2	GGCCAGA	GGCTAGA	C	T	NM_006009.3:c.103C>T	p.(Gln35*)	0.00368261	0.00209909	0.00229549	0.0026924	1447
chr12:g.49580516T>G	EXON2	GCCAGAT	GCCCGAT	A	C	NM_006009.3:c.104A>C	p.(Gln35Pro)	0.000871407	0.000548986	0.000670983	0.000697125	3826
chr12:g.49580516T>C	EXON2	GCCAGAT	GCCGGAT	A	G	NM_006009.3:c.104A>G	p.(Gln35Arg)	0.00482759	0.0027275	0.00318935	0.00358148	979
chr12:g.49580516T>A	EXON2	GCCAGAT	GCCTGAT	A	T	NM_006009.3:c.104A>T	p.(Gln35Leu)	0.000731981	0.000418275	0.000444417	0.000531558	4288
chr12:g.49580515C>T	EXON2	CCAGATG	CCAAATG	G	A	NM_006009.3:c.105G>A	p.(=)	0.00412842	0.00213352	0.00268197	0.0029813	1307
chr12:g.49580515C>G	EXON2	CCAGATG	CCACATG	G	C	NM_006009.3:c.105G>C	p.(Gln35His)	0.00281456	0.00148262	0.00180204	0.00203307	1762
chr12:g.49580515C>A	EXON2	CCAGATG	CCATATG	G	T	NM_006009.3:c.105G>T	p.(Gln35His)	0.00155494	0.0007172	0.000873899	0.00104868	2924
chr12:g.49580514T>G	EXON2	CAGATGC	CAGCTGC	A	C	NM_006009.3:c.106A>C	p.(Met36Leu)	0.00115043	0.000685086	0.000820811	0.000885442	3321
chr12:g.49580514T>C	EXON2	CAGATGC	CAGGTGC	A	G	NM_006009.3:c.106A>G	p.(Met36Val)	0.00495072	0.0030635	0.00358701	0.00386708	847
chr12:g.49580514T>A	EXON2	CAGATGC	CAGTTGC	A	T	NM_006009.3:c.106A>T	p.(Met36Leu)	0.00254645	0.00129908	0.00149297	0.0017795	1944
chr12:g.49580513A>T	EXON2	AGATGCC	AGAAGCC	T	A	NM_006009.3:c.107T>A	p.(Met36Lys)	0.001755	0.00119371	0.00122533	0.00139135	2378
chr12:g.49580513A>G	EXON2	AGATGCC	AGACGCC	T	C	NM_006009.3:c.107T>C	p.(Met36Thr)	0.00826904	0.00488553	0.00555749	0.00623735	229
chr12:g.49580513A>C	EXON2	AGATGCC	AGAGGCC	T	G	NM_006009.3:c.107T>G	p.(Met36Arg)	0.00157317	0.000917025	0.000972363	0.00115419	2726
chr12:g.49580512C>T	EXON2	GATGCCA	GATACCA	G	A	NM_006009.3:c.108G>A	p.(Met36Ile)	0.00667081	0.00358713	0.00429512	0.00485102	531
chr12:g.49580512C>G	EXON2	GATGCCA	GATCCCA	G	C	NM_006009.3:c.108G>C	p.(Met36Ile)	0.000652921	0.000322527	0.000424792	0.000466747	4397
chr12:g.49580512C>A	EXON2	GATGCCA	GATTCCA	G	T	NM_006009.3:c.108G>T	p.(Met36Ile)	0.00165197	0.000873184	0.000959716	0.00116162	2712
chr12:g.49580511G>T	EXON2	ATGCCAA	ATGACAA	C	A	NM_006009.3:c.109C>A	p.(Pro37Thr)	0.00366758	0.00178935	0.00222188	0.00255961	1491
chr12:g.49580511G>C	EXON2	ATGCCAA	ATGGCAA	C	G	NM_006009.3:c.109C>G	p.(Pro37Ala)	0.00159975	0.000835427	0.00105465	0.00116328	2703
chr12:g.49580511G>A	EXON2	ATGCCAA	ATGTCAA	C	T	NM_006009.3:c.109C>T	p.(Pro37Ser)	0.00931412	0.00450894	0.00558729	0.00647011	203
chr12:g.49580510G>T	EXON2	TGCCAAG	TGCAAAG	C	A	NM_006009.3:c.110C>A	p.(Pro37Gln)	0.00136703	0.000892879	0.000942141	0.00106735	2880
chr12:g.49580510G>C	EXON2	TGCCAAG	TGCGAAG	C	G	NM_006009.3:c.110C>G	p.(Pro37Arg)	0.00174881	0.000886721	0.000849775	0.00116177	2709
chr12:g.49580510G>A	EXON2	TGCCAAG	TGCTAAG	C	T	NM_006009.3:c.110C>T	p.(Pro37Leu)	0.00421193	0.00236459	0.00270327	0.00309326	1237
chr12:g.49580509T>G	EXON2	GCCAAGT	GCCCAGT	A	C	NM_006009.3:c.111A>C	p.(=)	0.00120395	0.000764553	0.00086122	0.000943241	3130
chr12:g.49580509T>C	EXON2	GCCAAGT	GCCGAGT	A	G	NM_006009.3:c.111A>G	p.(=)	0.00360306	0.0023376	0.00256609	0.00283558	1381
chr12:g.49580509T>A	EXON2	GCCAAGT	GCCTAGT	A	T	NM_006009.3:c.111A>T	p.(=)	0.000773341	0.000360307	0.000404246	0.000512631	4322
chr12:g.49580508T>G	EXON2	CCAAGTG	CCACGTG	A	C	NM_006009.3:c.112A>C	p.(Ser38Arg)	0.00177902	0.00101465	0.0010823	0.00129199	2498
chr12:g.49580508T>C	EXON2	CCAAGTG	CCAGGTG	A	G	NM_006009.3:c.112A>G	p.(Ser38Gly)	0.00649377	0.00362569	0.00430212	0.00480719	537
chr12:g.49580508T>A	EXON2	CCAAGTG	CCATGTG	A	T	NM_006009.3:c.112A>T	p.(Ser38Cys)	0.00131228	0.000838779	0.00100789	0.00105298	2914
chr12:g.49580507C>T	EXON2	CAAGTGA	CAAATGA	G	A	NM_006009.3:c.113G>A	p.(Ser38Asn)	0.00603632	0.00323977	0.00388351	0.00438654	672
chr12:g.49580507C>G	EXON2	CAAGTGA	CAACTGA	G	C	NM_006009.3:c.113G>C	p.(Ser38Thr)	0.00215633	0.00116435	0.00134023	0.00155364	2166
chr12:g.49580507C>A	EXON2	CAAGTGA	CAATTGA	G	T	NM_006009.3:c.113G>T	p.(Ser38Ile)	0.000939218	0.000531168	0.000594486	0.000688291	3849
chr12:g.49580506A>T	EXON2	AAGTGAC	AAGAGAC	T	A	NM_006009.3:c.114T>A	p.(Ser38Arg)	0.001392	0.000831042	0.000831042	0.00101803	2990
chr12:g.49580506A>G	EXON2	AAGTGAC	AAGCGAC	T	C	NM_006009.3:c.114T>C	p.(=)	0.00389897	0.00219534	0.0024585	0.00285094	1375
chr12:g.49580506A>C	EXON2	AAGTGAC	AAGGGAC	T	G	NM_006009.3:c.114T>G	p.(Ser38Arg)	0.0015028	0.000851818	0.000955699	0.00110344	2822
chr12:g.49580505C>T	EXON2	AGTGACA	AGTAACA	G	A	NM_006009.3:c.115G>A	p.(Asp39Asn)	0.00448479	0.00222897	0.00270161	0.00313846	1221
chr12:g.49580505C>G	EXON2	AGTGACA	AGTCACA	G	C	NM_006009.3:c.115G>C	p.(Asp39His)	0.00115477	0.000639149	0.000660633	0.000818182	3501
chr12:g.49580505C>A	EXON2	AGTGACA	AGTTACA	G	T	NM_006009.3:c.115G>T	p.(Asp39Tyr)	0.00096678	0.000504874	0.000606923	0.000692859	3836
chr12:g.49580504T>G	EXON2	GTGACAA	GTGCCAA	A	C	NM_006009.3:c.116A>C	p.(Asp39Ala)	0.000598427	0.000373137	0.000408339	0.000459968	4408
chr12:g.49580504T>C	EXON2	GTGACAA	GTGGCAA	A	G	NM_006009.3:c.116A>G	p.(Asp39Gly)	0.00423827	0.00244299	0.00273164	0.00313764	1222
chr12:g.49580504T>A	EXON2	GTGACAA	GTGTCAA	A	T	NM_006009.3:c.116A>T	p.(Asp39Val)	0.00133062	0.000788516	0.000894121	0.00100442	3012
chr12:g.49580503G>T	EXON2	TGACAAG	TGAAAAG	C	A	NM_006009.3:c.117C>A	p.(Asp39Glu)	0.00299605	0.00145284	0.00196724	0.00213871	1702
chr12:g.49580503G>C	EXON2	TGACAAG	TGAGAAG	C	G	NM_006009.3:c.117C>G	p.(Asp39Glu)	0.0032185	0.00176566	0.00183517	0.00227311	1625
chr12:g.49580503G>A	EXON2	TGACAAG	TGATAAG	C	T	NM_006009.3:c.117C>T	p.(=)	0.00502586	0.00280141	0.00311422	0.00364717	949
chr12:g.49580502T>G	EXON2	GACAAGA	GACCAGA	A	C	NM_006009.3:c.118A>C	p.(Lys40Gln)	0.00133831	0.000844262	0.00101311	0.00106523	2883
chr12:g.49580502T>C	EXON2	GACAAGA	GACGAGA	A	G	NM_006009.3:c.118A>G	p.(Lys40Glu)	0.00373977	0.00216381	0.00253279	0.00281212	1389
chr12:g.49580502T>A	EXON2	GACAAGA	GACTAGA	A	T	NM_006009.3:c.118A>T	p.(Lys40*)	0.00059411	0.00036272	0.000375227	0.000444019	4429
chr12:g.49580501T>G	EXON2	ACAAGAC	ACACGAC	A	C	NM_006009.3:c.119A>C	p.(Lys40Thr)	0.00125401	0.000647493	0.000795023	0.000898841	3255
chr12:g.49580501T>C	EXON2	ACAAGAC	ACAGGAC	A	G	NM_006009.3:c.119A>G	p.(Lys40Arg)	0.00386037	0.00213919	0.00254899	0.00284952	1377
chr12:g.49580501T>A	EXON2	ACAAGAC	ACATGAC	A	T	NM_006009.3:c.119A>T	p.(Lys40Met)	0.000909769	0.000631101	0.000622905	0.000721258	3758
chr12:g.49580500C>T	EXON2	CAAGACC	CAAAACC	G	A	NM_006009.3:c.120G>A	p.(=)	0.00323777	0.00156634	0.00213182	0.00231198	1599
chr12:g.49580500C>G	EXON2	CAAGACC	CAACACC	G	C	NM_006009.3:c.120G>C	p.(Lys40Asn)	0.00189662	0.00100086	0.00130612	0.0014012	2360
chr12:g.49580500C>A	EXON2	CAAGACC	CAATACC	G	T	NM_006009.3:c.120G>T	p.(Lys40Asn)	0.00130111	0.000680582	0.000835715	0.000939136	3147
chr12:g.49580499T>G	EXON2	AAGACCA	AAGCCCA	A	C	NM_006009.3:c.121A>C	p.(Thr41Pro)	0.000871489	0.000562251	0.00070683	0.000713523	3778
chr12:g.49580499T>C	EXON2	AAGACCA	AAGGCCA	A	G	NM_006009.3:c.121A>G	p.(Thr41Ala)	0.00392371	0.00222893	0.00269077	0.0029478	1326
chr12:g.49580499T>A	EXON2	AAGACCA	AAGTCCA	A	T	NM_006009.3:c.121A>T	p.(Thr41Ser)	0.00145382	0.000726911	0.000899602	0.00102678	2972
chr12:g.49580498G>T	EXON2	AGACCAT	AGAACAT	C	A	NM_006009.3:c.122C>A	p.(Thr41Asn)	0.00436646	0.00247008	0.00273037	0.00318897	1189
chr12:g.49580498G>C	EXON2	AGACCAT	AGAGCAT	C	G	NM_006009.3:c.122C>G	p.(Thr41Ser)	0.00182202	0.00112614	0.00121114	0.00138643	2380
chr12:g.49580498G>A	EXON2	AGACCAT	AGATCAT	C	T	NM_006009.3:c.122C>T	p.(Thr41Ile)	0.00800518	0.00390432	0.00539168	0.00576706	318
chr12:g.49580497G>T	EXON2	GACCATT	GACAATT	C	A	NM_006009.3:c.123C>A	p.(=)	0.00429478	0.0024316	0.00284213	0.00318951	1188
chr12:g.49580497G>C	EXON2	GACCATT	GACGATT	C	G	NM_006009.3:c.123C>G	p.(=)	0.00213686	0.00130528	0.00142107	0.00162107	2090
chr12:g.49580497G>A	EXON2	GACCATT	GACTATT	C	T	NM_006009.3:c.123C>T	p.(=)	0.00585269	0.00295793	0.00338951	0.00406671	772
chr12:g.49580496T>G	EXON2	ACCATTG	ACCCTTG	A	C	NM_006009.3:c.124A>C	p.(Ile42Leu)	0.00101541	0.000448179	0.00052521	0.000662932	3933
chr12:g.49580496T>C	EXON2	ACCATTG	ACCGTTG	A	G	NM_006009.3:c.124A>G	p.(Ile42Val)	0.00926471	0.0054972	0.00605742	0.00693978	173
chr12:g.49580496T>A	EXON2	ACCATTG	ACCTTTG	A	T	NM_006009.3:c.124A>T	p.(Ile42Phe)	0.00168768	0.00087535	0.000980392	0.00118114	2667
chr12:g.49580495A>T	EXON2	CCATTGG	CCAATGG	T	A	NM_006009.3:c.125T>A	p.(Ile42Asn)	0.00135928	0.000660496	0.000880661	0.000966813	3077
chr12:g.49580495A>G	EXON2	CCATTGG	CCACTGG	T	C	NM_006009.3:c.125T>C	p.(Ile42Thr)	0.03537	0.0185896	0.0213177	0.0250925	72
chr12:g.49580495A>C	EXON2	CCATTGG	CCAGTGG	T	G	NM_006009.3:c.125T>G	p.(Ile42Ser)	0.00106254	0.000612634	0.000670068	0.000781746	3594
chr12:g.49580494A>T	EXON2	CATTGGG	CATAGGG	T	A	NM_006009.3:c.126T>A	p.(=)	0.000732257	0.000478408	0.000527225	0.000579297	4182
chr12:g.49580494A>G	EXON2	CATTGGG	CATCGGG	T	C	NM_006009.3:c.126T>C	p.(=)	0.00495006	0.00288998	0.00337815	0.00373939	905
chr12:g.49580494A>C	EXON2	CATTGGG	CATGGGG	T	G	NM_006009.3:c.126T>G	p.(Ile42Met)	0.00144499	0.000781075	0.00099587	0.00107398	2865
chr12:g.49580493C>T	EXON2	ATTGGGG	ATTAGGG	G	A	NM_006009.3:c.127G>A	p.(Gly43Arg)	0.00583667	0.00276262	0.00312428	0.00390786	831
chr12:g.49580493C>G	EXON2	ATTGGGG	ATTCGGG	G	C	NM_006009.3:c.127G>C	p.(Gly43Arg)	0.00130597	0.000793627	0.000813719	0.000971105	3073
chr12:g.49580493C>A	EXON2	ATTGGGG	ATTTGGG	G	T	NM_006009.3:c.127G>T	p.(Gly43Trp)	0.0020996	0.00136624	0.00151693	0.00166092	2060
chr12:g.49580492C>T	EXON2	TTGGGGG	TTGAGGG	G	A	NM_006009.3:c.128G>A	p.(Gly43Glu)	0.00841612	0.00417982	0.00539737	0.00599777	268
chr12:g.49580492C>G	EXON2	TTGGGGG	TTGCGGG	G	C	NM_006009.3:c.128G>C	p.(Gly43Ala)	0.00846006	0.00461914	0.00559192	0.00622371	233
chr12:g.49580492C>A	EXON2	TTGGGGG	TTGTGGG	G	T	NM_006009.3:c.128G>T	p.(Gly43Val)	0.00560447	0.00335139	0.00394761	0.00430116	696
chr12:g.49580491C>T	EXON2	TGGGGGA	TGGAGGA	G	A	NM_006009.3:c.129G>A	p.(=)	0.0080269	0.00418817	0.00510481	0.00577329	313
chr12:g.49580491C>G	EXON2	TGGGGGA	TGGCGGA	G	C	NM_006009.3:c.129G>C	p.(=)	0.00214726	0.00109895	0.00116479	0.00147033	2268
chr12:g.49580491C>A	EXON2	TGGGGGA	TGGTGGA	G	T	NM_006009.3:c.129G>T	p.(=)	0.00161045	0.000901444	0.00103818	0.00118336	2663
chr12:g.49580490C>T	EXON2	GGGGGAG	GGGAGAG	G	A	NM_006009.3:c.130G>A	p.(Gly44Arg)	0.00967443	0.00524549	0.00663688	0.0071856	155
chr12:g.49580490C>G	EXON2	GGGGGAG	GGGCGAG	G	C	NM_006009.3:c.130G>C	p.(Gly44Arg)	0.00125421	0.000672833	0.000731624	0.000886223	3318
chr12:g.49580490C>A	EXON2	GGGGGAG	GGGTGAG	G	T	NM_006009.3:c.130G>T	p.(Gly44*)	0.00198584	0.00113663	0.0013326	0.00148502	2250
chr12:g.49580489C>T	EXON2	GGGGAGG	GGGAAGG	G	A	NM_006009.3:c.131G>A	p.(Gly44Glu)	0.00793237	0.0042545	0.00553714	0.005908	288
chr12:g.49580489C>G	EXON2	GGGGAGG	GGGCAGG	G	C	NM_006009.3:c.131G>C	p.(Gly44Ala)	0.00169663	0.000931481	0.00113848	0.00125553	2549
chr12:g.49580489C>A	EXON2	GGGGAGG	GGGTAGG	G	T	NM_006009.3:c.131G>T	p.(Gly44Val)	0.00241741	0.00118283	0.00153399	0.00171141	2009
chr12:g.49580488T>G	EXON2	GGGAGGA	GGGCGGA	A	C	NM_006009.3:c.132A>C	p.(=)	0.000794658	0.000536652	0.000557293	0.000629534	4030
chr12:g.49580488T>C	EXON2	GGGAGGA	GGGGGGA	A	G	NM_006009.3:c.132A>G	p.(=)	0.00202965	0.0010045	0.00133131	0.00145515	2288
chr12:g.49580488T>A	EXON2	GGGAGGA	GGGTGGA	A	T	NM_006009.3:c.132A>T	p.(=)	0.000897861	0.000457531	0.000560733	0.000638708	4006
chr12:g.49580487C>T	EXON2	GGAGGAG	GGAAGAG	G	A	NM_006009.3:c.133G>A	p.(Gly45Arg)	0.00808934	0.00423658	0.00502248	0.0057828	311
chr12:g.49580487C>G	EXON2	GGAGGAG	GGACGAG	G	C	NM_006009.3:c.133G>C	p.(Gly45Arg)	0.00101985	0.000515407	0.000679899	0.000738385	3717
chr12:g.49580487C>A	EXON2	GGAGGAG	GGATGAG	G	T	NM_006009.3:c.133G>T	p.(Gly45*)	0.000877289	0.000475198	0.000551961	0.000634816	4021
chr12:g.49580486C>T	EXON2	GAGGAGA	GAGAAGA	G	A	NM_006009.3:c.134G>A	p.(Gly45Glu)	0.00726552	0.0038736	0.00487311	0.00533741	408
chr12:g.49580486C>G	EXON2	GAGGAGA	GAGCAGA	G	C	NM_006009.3:c.134G>C	p.(Gly45Ala)	0.00147719	0.000863031	0.00099951	0.00111324	2802
chr12:g.49580486C>A	EXON2	GAGGAGA	GAGTAGA	G	T	NM_006009.3:c.134G>T	p.(Gly45Val)	0.00121627	0.000738594	0.000814862	0.000923243	3187
chr12:g.49580485T>G	EXON2	AGGAGAT	AGGCGAT	A	C	NM_006009.3:c.135A>C	p.(=)	0.00107312	0.000599571	0.000687406	0.000786698	3584
chr12:g.49580485T>C	EXON2	AGGAGAT	AGGGGAT	A	G	NM_006009.3:c.135A>G	p.(=)	0.00223789	0.00134808	0.00152757	0.00170451	2014
chr12:g.49580485T>A	EXON2	AGGAGAT	AGGTGAT	A	T	NM_006009.3:c.135A>T	p.(=)	0.00101965	0.000614846	0.000737052	0.000790517	3568
chr12:g.49580484C>T	EXON2	GGAGATG	GGAAATG	G	A	NM_006009.3:c.136G>A	p.(Asp46Asn)	0.00482063	0.00248978	0.00311487	0.00347509	1043
chr12:g.49580484C>G	EXON2	GGAGATG	GGACATG	G	C	NM_006009.3:c.136G>C	p.(Asp46His)	0.0016316	0.000858178	0.00102769	0.00117249	2686
chr12:g.49580484C>A	EXON2	GGAGATG	GGATATG	G	T	NM_006009.3:c.136G>T	p.(Asp46Tyr)	0.00144089	0.000794609	0.000932342	0.00105595	2908
chr12:g.49580483T>G	EXON2	GAGATGA	GAGCTGA	A	C	NM_006009.3:c.137A>C	p.(Asp46Ala)	0.0008033	0.000491137	0.000566056	0.000620164	4062
chr12:g.49580483T>C	EXON2	GAGATGA	GAGGTGA	A	G	NM_006009.3:c.137A>G	p.(Asp46Gly)	0.00482396	0.00279698	0.00315493	0.00359196	975
chr12:g.49580483T>A	EXON2	GAGATGA	GAGTTGA	A	T	NM_006009.3:c.137A>T	p.(Asp46Val)	0.00216433	0.00124865	0.00139017	0.00160105	2119
chr12:g.49580482A>T	EXON2	AGATGAT	AGAAGAT	T	A	NM_006009.3:c.138T>A	p.(Asp46Glu)	0.00252406	0.00138092	0.00167356	0.00185952	1883
chr12:g.49580482A>G	EXON2	AGATGAT	AGACGAT	T	C	NM_006009.3:c.138T>C	p.(=)	0.00816663	0.00460916	0.0055191	0.0060983	251
chr12:g.49580482A>C	EXON2	AGATGAT	AGAGGAT	T	G	NM_006009.3:c.138T>G	p.(Asp46Glu)	0.00124374	0.000676742	0.000777338	0.000899274	3254
chr12:g.49580481C>T	EXON2	GATGATT	GATAATT	G	A	NM_006009.3:c.139G>A	p.(Asp47Asn)	0.00461702	0.00235474	0.00295883	0.0033102	1122
chr12:g.49580481C>G	EXON2	GATGATT	GATCATT	G	C	NM_006009.3:c.139G>C	p.(Asp47His)	0.00104176	0.000591767	0.000684231	0.000772585	3636
chr12:g.49580481C>A	EXON2	GATGATT	GATTATT	G	T	NM_006009.3:c.139G>T	p.(Asp47Tyr)	0.00402525	0.0022746	0.0025335	0.00294445	1329
chr12:g.49580480T>G	EXON2	ATGATTC	ATGCTTC	A	C	NM_006009.3:c.140A>C	p.(Asp47Ala)	0.000784327	0.000456549	0.000444842	0.000561906	4227
chr12:g.49580480T>C	EXON2	ATGATTC	ATGGTTC	A	G	NM_006009.3:c.140A>G	p.(Asp47Gly)	0.00304951	0.00172084	0.00195497	0.00224177	1639
chr12:g.49580480T>A	EXON2	ATGATTC	ATGTTTC	A	T	NM_006009.3:c.140A>T	p.(Asp47Val)	0.00241737	0.00122917	0.00143403	0.00169352	2024
chr12:g.49580479A>T	EXON2	TGATTCC	TGAATCC	T	A	NM_006009.3:c.141T>A	p.(Asp47Glu)	0.000937534	0.000494106	0.000538448	0.000656696	3948
chr12:g.49580479A>G	EXON2	TGATTCC	TGACTCC	T	C	NM_006009.3:c.141T>C	p.(=)	0.00392117	0.00240085	0.00258455	0.00296886	1315
chr12:g.49580479A>C	EXON2	TGATTCC	TGAGTCC	T	G	NM_006009.3:c.141T>G	p.(Asp47Glu)	0.00112124	0.000519444	0.00070315	0.000781278	3599
chr12:g.49580478A>T	EXON2	GATTCCT	GATACCT	T	A	NM_006009.3:c.142T>A	p.(Ser48Thr)	0.00124053	0.00061052	0.000798872	0.000883306	3325
chr12:g.49580478A>G	EXON2	GATTCCT	GATCCCT	T	C	NM_006009.3:c.142T>C	p.(Ser48Pro)	0.00192249	0.0010132	0.00120805	0.00138125	2389
chr12:g.49580478A>C	EXON2	GATTCCT	GATGCCT	T	G	NM_006009.3:c.142T>G	p.(Ser48Ala)	0.00120156	0.000733924	0.000727429	0.000887636	3310
chr12:g.49580477G>T	EXON2	ATTCCTT	ATTACTT	C	A	NM_006009.3:c.143C>A	p.(Ser48Tyr)	0.00225161	0.00109099	0.00133969	0.00156076	2160
chr12:g.49580477G>C	EXON2	ATTCCTT	ATTGCTT	C	G	NM_006009.3:c.143C>G	p.(Ser48Cys)	0.00189016	0.00112746	0.00117057	0.00139606	2375
chr12:g.49580477G>A	EXON2	ATTCCTT	ATTTCTT	C	T	NM_006009.3:c.143C>T	p.(Ser48Phe)	0.00575338	0.00275897	0.00385327	0.00412187	753
chr12:g.49580476G>T	EXON2	TTCCTTC	TTCATTC	C	A	NM_006009.3:c.144C>A	p.(=)	0.00135388	0.000820735	0.000884889	0.00101983	2988
chr12:g.49580476G>C	EXON2	TTCCTTC	TTCGTTC	C	G	NM_006009.3:c.144C>G	p.(=)	0.000853918	0.000484477	0.0005973	0.000645232	3987
chr12:g.49580476G>A	EXON2	TTCCTTC	TTCTTTC	C	T	NM_006009.3:c.144C>T	p.(=)	0.00895508	0.00568541	0.00648181	0.00704077	165
chr12:g.49580475A>T	EXON2	TCCTTCA	TCCATCA	T	A	NM_006009.3:c.145T>A	p.(Phe49Ile)	0.000547921	0.000320552	0.000432373	0.000433615	4451
chr12:g.49580475A>G	EXON2	TCCTTCA	TCCCTCA	T	C	NM_006009.3:c.145T>C	p.(Phe49Leu)	0.00301915	0.00174813	0.00195313	0.00224014	1641
chr12:g.49580475A>C	EXON2	TCCTTCA	TCCGTCA	T	G	NM_006009.3:c.145T>G	p.(Phe49Val)	0.000894564	0.000514375	0.000533011	0.000647317	3979
chr12:g.49580474A>T	EXON2	CCTTCAA	CCTACAA	T	A	NM_006009.3:c.146T>A	p.(Phe49Tyr)	0.000523721	0.000323147	0.000356576	0.000401148	4485
chr12:g.49580474A>G	EXON2	CCTTCAA	CCTCCAA	T	C	NM_006009.3:c.146T>C	p.(Phe49Ser)	0.00225646	0.00128702	0.00162688	0.00172345	1989
chr12:g.49580474A>C	EXON2	CCTTCAA	CCTGCAA	T	G	NM_006009.3:c.146T>G	p.(Phe49Cys)	0.00093044	0.00055715	0.000663008	0.000716866	3772
chr12:g.49580473G>T	EXON2	CTTCAAC	CTTAAAC	C	A	NM_006009.3:c.147C>A	p.(Phe49Leu)	0.00126519	0.00079355	0.000808522	0.000955753	3103
chr12:g.49580473G>C	EXON2	CTTCAAC	CTTGAAC	C	G	NM_006009.3:c.147C>G	p.(Phe49Leu)	0.00182666	0.00121278	0.00143737	0.00149227	2236
chr12:g.49580473G>A	EXON2	CTTCAAC	CTTTAAC	C	T	NM_006009.3:c.147C>T	p.(=)	0.00415491	0.0023507	0.00268759	0.0030644	1254
chr12:g.49580472T>G	EXON2	TTCAACA	TTCCACA	A	C	NM_006009.3:c.148A>C	p.(Asn50His)	0.00146038	0.00080794	0.000899214	0.00105584	2909
chr12:g.49580472T>C	EXON2	TTCAACA	TTCGACA	A	G	NM_006009.3:c.148A>G	p.(Asn50Asp)	0.00240692	0.00141981	0.00159898	0.00180857	1926
chr12:g.49580472T>A	EXON2	TTCAACA	TTCTACA	A	T	NM_006009.3:c.148A>T	p.(Asn50Tyr)	0.000743711	0.000429324	0.000463129	0.000545388	4254
chr12:g.49580471T>G	EXON2	TCAACAC	TCACCAC	A	C	NM_006009.3:c.149A>C	p.(Asn50Thr)	0.00107748	0.000676372	0.000731425	0.000828424	3468
chr12:g.49580471T>C	EXON2	TCAACAC	TCAGCAC	A	G	NM_006009.3:c.149A>G	p.(Asn50Ser)	0.00622105	0.0033504	0.0039088	0.00449342	636
chr12:g.49580471T>A	EXON2	TCAACAC	TCATCAC	A	T	NM_006009.3:c.149A>T	p.(Asn50Ile)	0.00109321	0.000707831	0.000699966	0.000833668	3452
chr12:g.49580470G>T	EXON2	CAACACC	CAAAACC	C	A	NM_006009.3:c.150C>A	p.(Asn50Lys)	0.00204931	0.00125899	0.00130494	0.00153775	2190
chr12:g.49580470G>C	EXON2	CAACACC	CAAGACC	C	G	NM_006009.3:c.150C>G	p.(Asn50Lys)	0.00121305	0.000799507	0.000955733	0.000989429	3035
chr12:g.49580470G>A	EXON2	CAACACC	CAATACC	C	T	NM_006009.3:c.150C>T	p.(=)	0.00830752	0.00430999	0.0051922	0.00593657	278
chr12:g.49580469T>G	EXON2	AACACCT	AACCCCT	A	C	NM_006009.3:c.151A>C	p.(Thr51Pro)	0.00155088	0.000943726	0.00102292	0.00117251	2684
chr12:g.49580469T>C	EXON2	AACACCT	AACGCCT	A	G	NM_006009.3:c.151A>G	p.(Thr51Ala)	0.00396629	0.00239561	0.00261999	0.00299397	1300
chr12:g.49580469T>A	EXON2	AACACCT	AACTCCT	A	T	NM_006009.3:c.151A>T	p.(Thr51Ser)	0.00165647	0.00107572	0.00116811	0.0013001	2479
chr12:g.49580468G>T	EXON2	ACACCTT	ACAACTT	C	A	NM_006009.3:c.152C>A	p.(Thr51Asn)	0.00642345	0.0037244	0.00416167	0.00476984	562
chr12:g.49580468G>C	EXON2	ACACCTT	ACAGCTT	C	G	NM_006009.3:c.152C>G	p.(Thr51Ser)	0.00277445	0.00156063	0.0018622	0.00206576	1740
chr12:g.49580468G>A	EXON2	ACACCTT	ACATCTT	C	T	NM_006009.3:c.152C>T	p.(Thr51Ile)	0.0116105	0.00563183	0.00689842	0.0080469	124
chr12:g.49580467G>T	EXON2	CACCTTC	CACATTC	C	A	NM_006009.3:c.153C>A	p.(=)	0.00216865	0.001147	0.00132877	0.00154814	2180
chr12:g.49580467G>C	EXON2	CACCTTC	CACGTTC	C	G	NM_006009.3:c.153C>G	p.(=)	0.00133504	0.000633046	0.00082108	0.000929721	3169
chr12:g.49580467G>A	EXON2	CACCTTC	CACTTTC	C	T	NM_006009.3:c.153C>T	p.(=)	0.00754641	0.00379201	0.00456921	0.00530255	418
chr12:g.49580466A>T	EXON2	ACCTTCT	ACCATCT	T	A	NM_006009.3:c.154T>A	p.(Phe52Ile)	0.00086582	0.000464034	0.000633803	0.000654552	3957
chr12:g.49580466A>G	EXON2	ACCTTCT	ACCCTCT	T	C	NM_006009.3:c.154T>C	p.(Phe52Leu)	0.00311809	0.00190707	0.00211645	0.00238053	1566
chr12:g.49580466A>C	EXON2	ACCTTCT	ACCGTCT	T	G	NM_006009.3:c.154T>G	p.(Phe52Val)	0.00142606	0.000752641	0.000973341	0.00105068	2921
chr12:g.49580465A>T	EXON2	CCTTCTT	CCTACTT	T	A	NM_006009.3:c.155T>A	p.(Phe52Tyr)	0.000680372	0.000319144	0.000420849	0.000473455	4386
chr12:g.49580465A>G	EXON2	CCTTCTT	CCTCCTT	T	C	NM_006009.3:c.155T>C	p.(Phe52Ser)	0.00418043	0.00240235	0.00283372	0.00313883	1219
chr12:g.49580465A>C	EXON2	CCTTCTT	CCTGCTT	T	G	NM_006009.3:c.155T>G	p.(Phe52Cys)	0.000869754	0.000533075	0.000648809	0.000683879	3872
chr12:g.49580464G>T	EXON2	CTTCTTC	CTTATTC	C	A	NM_006009.3:c.156C>A	p.(Phe52Leu)	0.00241002	0.00127948	0.00144872	0.00171274	2004
chr12:g.49580464G>C	EXON2	CTTCTTC	CTTGTTC	C	G	NM_006009.3:c.156C>G	p.(Phe52Leu)	0.00132687	0.0007379	0.0008496	0.000971455	3071
chr12:g.49580464G>A	EXON2	CTTCTTC	CTTTTTC	C	T	NM_006009.3:c.156C>T	p.(=)	0.00468465	0.00256234	0.00324947	0.00349882	1027
chr12:g.49580463A>T	EXON2	TTCTTCA	TTCATCA	T	A	NM_006009.3:c.157T>A	p.(Phe53Ile)	0.000629836	0.000386788	0.000439056	0.000485227	4365
chr12:g.49580463A>G	EXON2	TTCTTCA	TTCCTCA	T	C	NM_006009.3:c.157T>C	p.(Phe53Leu)	0.00384958	0.00223971	0.00254025	0.00287651	1363
chr12:g.49580463A>C	EXON2	TTCTTCA	TTCGTCA	T	G	NM_006009.3:c.157T>G	p.(Phe53Val)	0.000865045	0.000493938	0.000598475	0.000652486	3966
chr12:g.49580462A>T	EXON2	TCTTCAG	TCTACAG	T	A	NM_006009.3:c.158T>A	p.(Phe53Tyr)	0.000553506	0.000285139	0.000343844	0.000394163	4494
chr12:g.49580462A>G	EXON2	TCTTCAG	TCTCCAG	T	C	NM_006009.3:c.158T>C	p.(Phe53Ser)	0.00197081	0.00113636	0.00140054	0.00150257	2224
chr12:g.49580462A>C	EXON2	TCTTCAG	TCTGCAG	T	G	NM_006009.3:c.158T>G	p.(Phe53Cys)	0.00161858	0.000880577	0.00107766	0.00119227	2647
chr12:g.49580461G>T	EXON2	CTTCAGT	CTTAAGT	C	A	NM_006009.3:c.159C>A	p.(Phe53Leu)	0.00103676	0.000606404	0.000596624	0.000746595	3696
chr12:g.49580461G>C	EXON2	CTTCAGT	CTTGAGT	C	G	NM_006009.3:c.159C>G	p.(Phe53Leu)	0.00120792	0.000772677	0.000846032	0.000942209	3133
chr12:g.49580461G>A	EXON2	CTTCAGT	CTTTAGT	C	T	NM_006009.3:c.159C>T	p.(=)	0.00490992	0.00267992	0.00323253	0.00360745	967
chr12:g.49580460T>G	EXON2	TTCAGTG	TTCCGTG	A	C	NM_006009.3:c.160A>C	p.(Ser54Arg)	0.00153112	0.000772031	0.000966117	0.00108976	2841
chr12:g.49580460T>C	EXON2	TTCAGTG	TTCGGTG	A	G	NM_006009.3:c.160A>G	p.(Ser54Gly)	0.00535677	0.00308812	0.00352805	0.00399098	802
chr12:g.49580460T>A	EXON2	TTCAGTG	TTCTGTG	A	T	NM_006009.3:c.160A>T	p.(Ser54Cys)	0.00121627	0.000664205	0.000815161	0.000898546	3258
chr12:g.49580459C>T	EXON2	TCAGTGA	TCAATGA	G	A	NM_006009.3:c.161G>A	p.(Ser54Asn)	0.00868384	0.00555674	0.00633274	0.00685777	177
chr12:g.49580459C>G	EXON2	TCAGTGA	TCACTGA	G	C	NM_006009.3:c.161G>C	p.(Ser54Thr)	0.00222177	0.00116401	0.00127486	0.00155355	2167
chr12:g.49580459C>A	EXON2	TCAGTGA	TCATTGA	G	T	NM_006009.3:c.161G>T	p.(Ser54Ile)	0.00150581	0.000873003	0.000882242	0.00108702	2843
chr12:g.49580458A>T	EXON2	CAGTGAG	CAGAGAG	T	A	NM_006009.3:c.162T>A	p.(Ser54Arg)	0.00108764	0.00057725	0.00070429	0.000789726	3573
chr12:g.49580458A>G	EXON2	CAGTGAG	CAGCGAG	T	C	NM_006009.3:c.162T>C	p.(=)	0.00401401	0.0023402	0.00277258	0.00304226	1274
chr12:g.49580458A>C	EXON2	CAGTGAG	CAGGGAG	T	G	NM_006009.3:c.162T>G	p.(Ser54Arg)	0.00140858	0.000784525	0.000869218	0.00102077	2985
chr12:g.49580457C>T	EXON2	AGTGAGA	AGTAAGA	G	A	NM_006009.3:c.163G>A	p.(Glu55Lys)	0.00611486	0.00319564	0.0037823	0.00436427	678
chr12:g.49580457C>G	EXON2	AGTGAGA	AGTCAGA	G	C	NM_006009.3:c.163G>C	p.(Glu55Gln)	0.00106051	0.000654358	0.000736153	0.000817007	3503
chr12:g.49580457C>A	EXON2	AGTGAGA	AGTTAGA	G	T	NM_006009.3:c.163G>T	p.(Glu55*)	0.000834871	0.000482307	0.000544358	0.000620512	4061
chr12:g.49580456T>G	EXON2	GTGAGAC	GTGCGAC	A	C	NM_006009.3:c.164A>C	p.(Glu55Ala)	0.000584118	0.00034745	0.000372627	0.000434732	4448
chr12:g.49580456T>C	EXON2	GTGAGAC	GTGGGAC	A	G	NM_006009.3:c.164A>G	p.(Glu55Gly)	0.00213002	0.00125384	0.00146533	0.0016164	2098
chr12:g.49580456T>A	EXON2	GTGAGAC	GTGTGAC	A	T	NM_006009.3:c.164A>T	p.(Glu55Val)	0.000533763	0.000322272	0.000307166	0.000387734	4502
chr12:g.49580455C>T	EXON2	TGAGACG	TGAAACG	G	A	NM_006009.3:c.165G>A	p.(=)	0.00333519	0.0016048	0.00210717	0.00234906	1581
chr12:g.49580455C>G	EXON2	TGAGACG	TGACACG	G	C	NM_006009.3:c.165G>C	p.(Glu55Asp)	0.00128384	0.000614011	0.000823332	0.000907061	3232
chr12:g.49580455C>A	EXON2	TGAGACG	TGATACG	G	T	NM_006009.3:c.165G>T	p.(Glu55Asp)	0.00066983	0.000390734	0.000446553	0.000502372	4342
chr12:g.49580454T>G	EXON2	GAGACGG	GAGCCGG	A	C	NM_006009.3:c.166A>C	p.(Thr56Pro)	0.000435272	0.000294645	0.000294645	0.000341521	4525
chr12:g.49580454T>C	EXON2	GAGACGG	GAGGCGG	A	G	NM_006009.3:c.166A>G	p.(Thr56Ala)	0.00358262	0.00216297	0.00263172	0.00279244	1398
chr12:g.49580454T>A	EXON2	GAGACGG	GAGTCGG	A	T	NM_006009.3:c.166A>T	p.(Thr56Ser)	0.00109153	0.000716524	0.000736614	0.000848222	3410
chr12:g.49580453G>T	EXON2	AGACGGG	AGAAGGG	C	A	NM_006009.3:c.167C>A	p.(Thr56Lys)	0.00324484	0.00188893	0.00217881	0.00243753	1544
chr12:g.49580453G>C	EXON2	AGACGGG	AGAGGGG	C	G	NM_006009.3:c.167C>G	p.(Thr56Arg)	0.00301106	0.00197309	0.00228167	0.00242194	1549
chr12:g.49580453G>A	EXON2	AGACGGG	AGATGGG	C	T	NM_006009.3:c.167C>T	p.(Thr56Met)	0.095316	0.0545358	0.065009	0.0716203	15
chr12:g.49580452C>T	EXON2	GACGGGG	GACAGGG	G	A	NM_006009.3:c.168G>A	p.(=)	0.0626695	0.034813	0.0424476	0.0466434	61
chr12:g.49580452C>G	EXON2	GACGGGG	GACCGGG	G	C	NM_006009.3:c.168G>C	p.(=)	0.00326757	0.00183929	0.00226058	0.00245582	1535
chr12:g.49580452C>A	EXON2	GACGGGG	GACTGGG	G	T	NM_006009.3:c.168G>T	p.(=)	0.00370941	0.0020448	0.00234279	0.002699	1444
chr12:g.49580451C>T	EXON2	ACGGGGG	ACGAGGG	G	A	NM_006009.3:c.169G>A	p.(Gly57Arg)	0.00691109	0.00308793	0.00406823	0.00468908	581
chr12:g.49580451C>G	EXON2	ACGGGGG	ACGCGGG	G	C	NM_006009.3:c.169G>C	p.(Gly57Arg)	0.00254877	0.00142143	0.00196059	0.00197693	1796
chr12:g.49580451C>A	EXON2	ACGGGGG	ACGTGGG	G	T	NM_006009.3:c.169G>T	p.(Gly57Trp)	0.00279384	0.00171552	0.00191158	0.00214031	1701
chr12:g.49580450C>T	EXON2	CGGGGGC	CGGAGGC	G	A	NM_006009.3:c.170G>A	p.(Gly57Glu)	0.00783806	0.00388098	0.00521269	0.00564391	341
chr12:g.49580450C>G	EXON2	CGGGGGC	CGGCGGC	G	C	NM_006009.3:c.170G>C	p.(Gly57Ala)	0.00159805	0.00102732	0.00125561	0.00129366	2497
chr12:g.49580450C>A	EXON2	CGGGGGC	CGGTGGC	G	T	NM_006009.3:c.170G>T	p.(Gly57Val)	0.00243513	0.00156	0.0017883	0.00192781	1836
chr12:g.49580449C>T	EXON2	GGGGGCT	GGGAGCT	G	A	NM_006009.3:c.171G>A	p.(=)	0.00790423	0.00418289	0.00514448	0.00574387	321
chr12:g.49580449C>G	EXON2	GGGGGCT	GGGCGCT	G	C	NM_006009.3:c.171G>C	p.(=)	0.00188471	0.00110582	0.0012116	0.00140071	2364
chr12:g.49580449C>A	EXON2	GGGGGCT	GGGTGCT	G	T	NM_006009.3:c.171G>T	p.(=)	0.00380788	0.00202894	0.00227896	0.00270526	1443
chr12:g.49580448C>T	EXON2	GGGGCTG	GGGACTG	G	A	NM_006009.3:c.172G>A	p.(Ala58Thr)	0.00806068	0.0040276	0.00517678	0.00575502	319
chr12:g.49580448C>G	EXON2	GGGGCTG	GGGCCTG	G	C	NM_006009.3:c.172G>C	p.(Ala58Pro)	0.0022108	0.00119843	0.00131335	0.00157419	2148
chr12:g.49580448C>A	EXON2	GGGGCTG	GGGTCTG	G	T	NM_006009.3:c.172G>T	p.(Ala58Ser)	0.00406044	0.0021725	0.00254461	0.00292585	1334
chr12:g.49580447G>T	EXON2	GGGCTGG	GGGATGG	C	A	NM_006009.3:c.173C>A	p.(Ala58Asp)	0.00179082	0.00100734	0.00104627	0.00128148	2512
chr12:g.49580447G>C	EXON2	GGGCTGG	GGGGTGG	C	G	NM_006009.3:c.173C>G	p.(Ala58Gly)	0.00145991	0.000866214	0.0010122	0.00111278	2803
chr12:g.49580447G>A	EXON2	GGGCTGG	GGGTTGG	C	T	NM_006009.3:c.173C>T	p.(Ala58Val)	0.00474471	0.00290036	0.00308528	0.00357678	980
chr12:g.49580446A>T	EXON2	GGCTGGC	GGCAGGC	T	A	NM_006009.3:c.174T>A	p.(=)	0.000923086	0.000535985	0.000632761	0.000697277	3825
chr12:g.49580446A>G	EXON2	GGCTGGC	GGCCGGC	T	C	NM_006009.3:c.174T>C	p.(=)	0.00359557	0.00241938	0.00273204	0.00291566	1344
chr12:g.49580446A>C	EXON2	GGCTGGC	GGCGGGC	T	G	NM_006009.3:c.174T>G	p.(=)	0.00118363	0.000677426	0.000826311	0.000895791	3274
chr12:g.49580445C>T	EXON2	GCTGGCA	GCTAGCA	G	A	NM_006009.3:c.175G>A	p.(Gly59Ser)	0.00486106	0.00252325	0.00307955	0.00348795	1034
chr12:g.49580445C>G	EXON2	GCTGGCA	GCTCGCA	G	C	NM_006009.3:c.175G>C	p.(Gly59Arg)	0.000649024	0.000298021	0.000456966	0.000468004	4395
chr12:g.49580445C>A	EXON2	GCTGGCA	GCTTGCA	G	T	NM_006009.3:c.175G>T	p.(Gly59Cys)	0.00129805	0.000781478	0.000814591	0.000964706	3081
chr12:g.49580444C>T	EXON2	CTGGCAA	CTGACAA	G	A	NM_006009.3:c.176G>A	p.(Gly59Asp)	0.00663735	0.00355805	0.0041609	0.00478543	554
chr12:g.49580444C>G	EXON2	CTGGCAA	CTGCCAA	G	C	NM_006009.3:c.176G>C	p.(Gly59Ala)	0.00112297	0.000620589	0.000721066	0.000821542	3490
chr12:g.49580444C>A	EXON2	CTGGCAA	CTGTCAA	G	T	NM_006009.3:c.176G>T	p.(Gly59Val)	0.00236415	0.00131801	0.00134757	0.00167658	2049
chr12:g.49580443G>T	EXON2	TGGCAAG	TGGAAAG	C	A	NM_006009.3:c.177C>A	p.(=)	0.00322359	0.00160178	0.00204895	0.00229144	1614
chr12:g.49580443G>C	EXON2	TGGCAAG	TGGGAAG	C	G	NM_006009.3:c.177C>G	p.(=)	0.00166185	0.000941048	0.00116129	0.00125473	2554
chr12:g.49580443G>A	EXON2	TGGCAAG	TGGTAAG	C	T	NM_006009.3:c.177C>T	p.(=)	0.00442493	0.00254951	0.00290991	0.00329478	1130
chr12:g.49580442T>G	EXON2	GGCAAGC	GGCCAGC	A	C	NM_006009.3:c.178A>C	p.(Lys60Gln)	0.000863674	0.000539796	0.000674746	0.000692739	3837
chr12:g.49580442T>C	EXON2	GGCAAGC	GGCGAGC	A	G	NM_006009.3:c.178A>G	p.(Lys60Glu)	0.00288791	0.00217268	0.00226714	0.00244258	1542
chr12:g.49580442T>A	EXON2	GGCAAGC	GGCTAGC	A	T	NM_006009.3:c.178A>T	p.(Lys60*)	0.000593776	0.000418342	0.000283393	0.000431837	4452
chr12:g.49580441T>G	EXON2	GCAAGCA	GCACGCA	A	C	NM_006009.3:c.179A>C	p.(Lys60Thr)	0.000774851	0.000468316	0.00051089	0.000584686	4176
chr12:g.49580441T>C	EXON2	GCAAGCA	GCAGGCA	A	G	NM_006009.3:c.179A>G	p.(Lys60Arg)	0.0039594	0.00241822	0.00254594	0.00297452	1312
chr12:g.49580441T>A	EXON2	GCAAGCA	GCATGCA	A	T	NM_006009.3:c.179A>T	p.(Lys60Met)	0.000885544	0.00051089	0.000638613	0.000678349	3887
chr12:g.49580440C>T	EXON2	CAAGCAT	CAAACAT	G	A	NM_006009.3:c.180G>A	p.(=)	0.00942714	0.00495681	0.00613356	0.00683917	179
chr12:g.49580440C>G	EXON2	CAAGCAT	CAACCAT	G	C	NM_006009.3:c.180G>C	p.(Lys60Asn)	0.00180785	0.00096638	0.00107814	0.00128412	2507
chr12:g.49580440C>A	EXON2	CAAGCAT	CAATCAT	G	T	NM_006009.3:c.180G>T	p.(Lys60Asn)	0.00154489	0.000723142	0.00090064	0.00105623	2904
chr12:g.49580439G>T	EXON2	AAGCATG	AAGAATG	C	A	NM_006009.3:c.181C>A	p.(His61Asn)	0.0018325	0.00104876	0.00126866	0.00138331	2384
chr12:g.49580439G>C	EXON2	AAGCATG	AAGGATG	C	G	NM_006009.3:c.181C>G	p.(His61Asp)	0.00147728	0.00081194	0.000941625	0.00107695	2859
chr12:g.49580439G>A	EXON2	AAGCATG	AAGTATG	C	T	NM_006009.3:c.181C>T	p.(His61Tyr)	0.00583582	0.0031068	0.00343383	0.00412548	752
chr12:g.49580438T>G	EXON2	AGCATGT	AGCCTGT	A	C	NM_006009.3:c.182A>C	p.(His61Pro)	0.00207151	0.00107866	0.00132993	0.00149337	2235
chr12:g.49580438T>C	EXON2	AGCATGT	AGCGTGT	A	G	NM_006009.3:c.182A>G	p.(His61Arg)	0.00872118	0.00490298	0.00574262	0.00645559	207
chr12:g.49580438T>A	EXON2	AGCATGT	AGCTTGT	A	T	NM_006009.3:c.182A>T	p.(His61Leu)	0.00210215	0.00109091	0.00129316	0.00149541	2233
chr12:g.49580437A>T	EXON2	GCATGTG	GCAAGTG	T	A	NM_006009.3:c.183T>A	p.(His61Gln)	0.00213751	0.00131284	0.00135549	0.00160195	2117
chr12:g.49580437A>G	EXON2	GCATGTG	GCACGTG	T	C	NM_006009.3:c.183T>C	p.(=)	0.0100809	0.00592911	0.0067443	0.00758477	132
chr12:g.49580437A>C	EXON2	GCATGTG	GCAGGTG	T	G	NM_006009.3:c.183T>G	p.(His61Gln)	0.00156403	0.000962117	0.00105217	0.00119277	2646
chr12:g.49580436C>T	EXON2	CATGTGC	CATATGC	G	A	NM_006009.3:c.184G>A	p.(Val62Met)	0.00783736	0.00407637	0.00481068	0.0055748	363
chr12:g.49580436C>G	EXON2	CATGTGC	CATCTGC	G	C	NM_006009.3:c.184G>C	p.(Val62Leu)	0.00116737	0.000644876	0.000743725	0.000851989	3400
chr12:g.49580436C>A	EXON2	CATGTGC	CATTTGC	G	T	NM_006009.3:c.184G>T	p.(Val62Leu)	0.00139802	0.000762554	0.000913182	0.00102458	2982
chr12:g.49580435A>T	EXON2	ATGTGCC	ATGAGCC	T	A	NM_006009.3:c.185T>A	p.(Val62Glu)	0.00119347	0.000706226	0.000854041	0.000917912	3205
chr12:g.49580435A>G	EXON2	ATGTGCC	ATGCGCC	T	C	NM_006009.3:c.185T>C	p.(Val62Ala)	0.0046589	0.00298914	0.00341069	0.00368625	932
chr12:g.49580435A>C	EXON2	ATGTGCC	ATGGGCC	T	G	NM_006009.3:c.185T>G	p.(Val62Gly)	0.00128106	0.000678853	0.000837617	0.000932511	3162
chr12:g.49580434C>T	EXON2	TGTGCCC	TGTACCC	G	A	NM_006009.3:c.186G>A	p.(=)	0.00548649	0.00308837	0.00355804	0.0040443	777
chr12:g.49580434C>G	EXON2	TGTGCCC	TGTCCCC	G	C	NM_006009.3:c.186G>C	p.(=)	0.00111011	0.000604866	0.000654678	0.000789884	3572
chr12:g.49580434C>A	EXON2	TGTGCCC	TGTTCCC	G	T	NM_006009.3:c.186G>T	p.(=)	0.00223445	0.0012382	0.00147303	0.00164856	2071
chr12:g.49580433G>T	EXON2	GTGCCCC	GTGACCC	C	A	NM_006009.3:c.187C>A	p.(Pro63Thr)	0.00364664	0.00188844	0.0022531	0.00259606	1480
chr12:g.49580433G>C	EXON2	GTGCCCC	GTGGCCC	C	G	NM_006009.3:c.187C>G	p.(Pro63Ala)	0.00161494	0.000833518	0.00114609	0.00119818	2640
chr12:g.49580433G>A	EXON2	GTGCCCC	GTGTCCC	C	T	NM_006009.3:c.187C>T	p.(Pro63Ser)	0.0121772	0.00622534	0.00815285	0.00885179	112
chr12:g.49580432G>T	EXON2	TGCCCCG	TGCACCG	C	A	NM_006009.3:c.188C>A	p.(Pro63His)	0.00163797	0.000655189	0.00101918	0.00110411	2818
chr12:g.49580432G>C	EXON2	TGCCCCG	TGCGCCG	C	G	NM_006009.3:c.188C>G	p.(Pro63Arg)	0.00109198	0.000509591	0.000764387	0.000788653	3580
chr12:g.49580432G>A	EXON2	TGCCCCG	TGCTCCG	C	T	NM_006009.3:c.188C>T	p.(Pro63Leu)	0.00702508	0.00345794	0.00436792	0.00495032	502
chr12:g.49580431G>T	EXON2	GCCCCGG	GCCACGG	C	A	NM_006009.3:c.189C>A	p.(=)	0.00136412	0.000714541	0.00074702	0.000941895	3135
chr12:g.49580431G>C	EXON2	GCCCCGG	GCCGCGG	C	G	NM_006009.3:c.189C>G	p.(=)	0.00201371	0.00113677	0.00126669	0.00147239	2263
chr12:g.49580431G>A	EXON2	GCCCCGG	GCCTCGG	C	T	NM_006009.3:c.189C>T	p.(=)	0.00561889	0.0029556	0.00396245	0.00417898	734
chr12:g.49580430G>T	EXON2	CCCCGGG	CCCAGGG	C	A	NM_006009.3:c.190C>A	p.(=)	0.00487909	0.00289696	0.00344586	0.00374064	903
chr12:g.49580430G>C	EXON2	CCCCGGG	CCCGGGG	C	G	NM_006009.3:c.190C>G	p.(Arg64Gly)	0.00640381	0.00387278	0.00457415	0.00495024	503
chr12:g.49580430G>A	EXON2	CCCCGGG	CCCTGGG	C	T	NM_006009.3:c.190C>T	p.(Arg64Trp)	0.0761443	0.0433324	0.0505901	0.0566889	47
chr12:g.49580429C>T	EXON2	CCCGGGC	CCCAGGC	G	A	NM_006009.3:c.191G>A	p.(Arg64Gln)	0.0812647	0.045153	0.0535523	0.05999	40
chr12:g.49580429C>G	EXON2	CCCGGGC	CCCCGGC	G	C	NM_006009.3:c.191G>C	p.(Arg64Pro)	0.00500214	0.00262144	0.00345067	0.00369142	927
chr12:g.49580429C>A	EXON2	CCCGGGC	CCCTGGC	G	T	NM_006009.3:c.191G>T	p.(Arg64Leu)	0.00411941	0.0021132	0.00248769	0.00290677	1346
chr12:g.49580428C>T	EXON2	CCGGGCA	CCGAGCA	G	A	NM_006009.3:c.192G>A	p.(=)	0.00430127	0.00192815	0.00271425	0.00298122	1310
chr12:g.49580428C>G	EXON2	CCGGGCA	CCGCGCA	G	C	NM_006009.3:c.192G>C	p.(=)	0.00114206	0.000622942	0.000845421	0.000870141	3356
chr12:g.49580428C>A	EXON2	CCGGGCA	CCGTGCA	G	T	NM_006009.3:c.192G>T	p.(=)	0.00109756	0.000697102	0.000845421	0.000880029	3331
chr12:g.49580427C>T	EXON2	CGGGCAG	CGGACAG	G	A	NM_006009.3:c.193G>A	p.(Ala65Thr)	0.00668834	0.00334417	0.00427829	0.00477027	561
chr12:g.49580427C>G	EXON2	CGGGCAG	CGGCCAG	G	C	NM_006009.3:c.193G>C	p.(Ala65Pro)	0.000709935	0.000467063	0.000579158	0.000585385	4172
chr12:g.49580427C>A	EXON2	CGGGCAG	CGGTCAG	G	T	NM_006009.3:c.193G>T	p.(Ala65Ser)	0.00162538	0.000840713	0.000934125	0.00113341	2768
chr12:g.49580426G>T	EXON2	GGGCAGT	GGGAAGT	C	A	NM_006009.3:c.194C>A	p.(Ala65Glu)	0.00459397	0.0024999	0.00281644	0.00330344	1126
chr12:g.49580426G>C	EXON2	GGGCAGT	GGGGAGT	C	G	NM_006009.3:c.194C>G	p.(Ala65Gly)	0.00110385	0.000641208	0.000754839	0.000833299	3454
chr12:g.49580426G>A	EXON2	GGGCAGT	GGGTAGT	C	T	NM_006009.3:c.194C>T	p.(Ala65Val)	0.00507285	0.00288138	0.00322227	0.0037255	917
chr12:g.49580425T>G	EXON2	GGCAGTG	GGCCGTG	A	C	NM_006009.3:c.195A>C	p.(=)	0.00145951	0.000782102	0.000849843	0.00103049	2968
chr12:g.49580425T>C	EXON2	GGCAGTG	GGCGGTG	A	G	NM_006009.3:c.195A>G	p.(=)	0.00498821	0.00306067	0.00343632	0.0038284	864
chr12:g.49580425T>A	EXON2	GGCAGTG	GGCTGTG	A	T	NM_006009.3:c.195A>T	p.(=)	0.00117623	0.000628145	0.000763627	0.000856001	3387
chr12:g.49580424C>T	EXON2	GCAGTGT	GCAATGT	G	A	NM_006009.3:c.196G>A	p.(Val66Met)	0.00696082	0.00383542	0.00441866	0.00507164	471
chr12:g.49580424C>G	EXON2	GCAGTGT	GCACTGT	G	C	NM_006009.3:c.196G>C	p.(Val66Leu)	0.00287181	0.00154685	0.00179409	0.00207092	1735
chr12:g.49580424C>A	EXON2	GCAGTGT	GCATTGT	G	T	NM_006009.3:c.196G>T	p.(Val66Leu)	0.00158489	0.000855839	0.00102701	0.00115591	2721
chr12:g.49580423A>T	EXON2	CAGTGTT	CAGAGTT	T	A	NM_006009.3:c.197T>A	p.(Val66Glu)	0.00141716	0.00077876	0.000805926	0.00100062	3018
chr12:g.49580423A>G	EXON2	CAGTGTT	CAGCGTT	T	C	NM_006009.3:c.197T>C	p.(Val66Ala)	0.00535624	0.00303807	0.00329162	0.00389531	837
chr12:g.49580423A>C	EXON2	CAGTGTT	CAGGGTT	T	G	NM_006009.3:c.197T>G	p.(Val66Gly)	0.00206009	0.00134925	0.00146244	0.00162393	2085
chr12:g.49580422C>T	EXON2	AGTGTTT	AGTATTT	G	A	NM_006009.3:c.198G>A	p.(=)	0.00673753	0.00354775	0.00422114	0.00483547	534
chr12:g.49580422C>G	EXON2	AGTGTTT	AGTCTTT	G	C	NM_006009.3:c.198G>C	p.(=)	0.00114123	0.000634412	0.000769092	0.000848246	3409
chr12:g.49580422C>A	EXON2	AGTGTTT	AGTTTTT	G	T	NM_006009.3:c.198G>T	p.(=)	0.00144249	0.000822255	0.000956934	0.00107389	2866
chr12:g.49580421A>T	EXON2	GTGTTTG	GTGATTG	T	A	NM_006009.3:c.199T>A	p.(Phe67Ile)	0.00109894	0.000617587	0.000731114	0.000815881	3506
chr12:g.49580421A>G	EXON2	GTGTTTG	GTGCTTG	T	C	NM_006009.3:c.199T>C	p.(Phe67Leu)	0.00313788	0.0017801	0.00197537	0.00229779	1608
chr12:g.49580421A>C	EXON2	GTGTTTG	GTGGTTG	T	G	NM_006009.3:c.199T>G	p.(Phe67Val)	0.000862805	0.00042232	0.000485895	0.00059034	4152
chr12:g.49580420A>T	EXON2	TGTTTGT	TGTATGT	T	A	NM_006009.3:c.200T>A	p.(Phe67Tyr)	0.000612066	0.000389497	0.000402851	0.000468138	4394
chr12:g.49580420A>G	EXON2	TGTTTGT	TGTCTGT	T	C	NM_006009.3:c.200T>C	p.(Phe67Ser)	0.00299578	0.00172714	0.00185623	0.00219305	1665
chr12:g.49580420A>C	EXON2	TGTTTGT	TGTGTGT	T	G	NM_006009.3:c.200T>G	p.(Phe67Cys)	0.00153128	0.000965951	0.00111062	0.00120262	2635
chr12:g.49580419A>T	EXON2	GTTTGTA	GTTAGTA	T	A	NM_006009.3:c.201T>A	p.(Phe67Leu)	0.000783653	0.00035942	0.000406557	0.000516543	4314
chr12:g.49580419A>G	EXON2	GTTTGTA	GTTCGTA	T	C	NM_006009.3:c.201T>C	p.(=)	0.00345279	0.00195029	0.00242166	0.00260825	1475
chr12:g.49580419A>C	EXON2	GTTTGTA	GTTGGTA	T	G	NM_006009.3:c.201T>G	p.(Phe67Leu)	0.00175585	0.000972201	0.00119021	0.00130609	2472
chr12:g.49580418C>T	EXON2	TTTGTAG	TTTATAG	G	A	NM_006009.3:c.202G>A	p.(Val68Ile)	0.00725488	0.00414759	0.00471873	0.00537373	400
chr12:g.49580418C>G	EXON2	TTTGTAG	TTTCTAG	G	C	NM_006009.3:c.202G>C	p.(Val68Leu)	0.00168623	0.000951905	0.0010505	0.00122954	2598
chr12:g.49580418C>A	EXON2	TTTGTAG	TTTTTAG	G	T	NM_006009.3:c.202G>T	p.(Val68Leu)	0.00268573	0.00147545	0.00170663	0.00195594	1810
chr12:g.49580417A>T	EXON2	TTGTAGA	TTGAAGA	T	A	NM_006009.3:c.203T>A	p.(Val68Glu)	0.000668274	0.00040181	0.000444106	0.00050473	4337
chr12:g.49580417A>G	EXON2	TTGTAGA	TTGCAGA	T	C	NM_006009.3:c.203T>C	p.(Val68Ala)	0.00717337	0.00415345	0.00470329	0.00534337	407
chr12:g.49580417A>C	EXON2	TTGTAGA	TTGGAGA	T	G	NM_006009.3:c.203T>G	p.(Val68Gly)	0.000896671	0.00050755	0.000621749	0.000675323	3897
chr12:g.49580416T>G	EXON2	TGTAGAC	TGTCGAC	A	C	NM_006009.3:c.204A>C	p.(=)	0.000574633	0.000308599	0.000308599	0.000397277	4490
chr12:g.49580416T>C	EXON2	TGTAGAC	TGTGGAC	A	G	NM_006009.3:c.204A>G	p.(=)	0.00397987	0.00231981	0.00280932	0.00303633	1277
chr12:g.49580416T>A	EXON2	TGTAGAC	TGTTGAC	A	T	NM_006009.3:c.204A>T	p.(=)	0.000755536	0.000478861	0.000340523	0.000524973	4292
chr12:g.49580415C>T	EXON2	GTAGACT	GTAAACT	G	A	NM_006009.3:c.205G>A	p.(Asp69Asn)	0.00396912	0.002049	0.00247426	0.00283079	1382
chr12:g.49580415C>G	EXON2	GTAGACT	GTACACT	G	C	NM_006009.3:c.205G>C	p.(Asp69His)	0.00244848	0.00123713	0.00148198	0.00172253	1992
chr12:g.49580415C>A	EXON2	GTAGACT	GTATACT	G	T	NM_006009.3:c.205G>T	p.(Asp69Tyr)	0.00162373	0.000708772	0.00110826	0.00114692	2738
chr12:g.49580414T>G	EXON2	TAGACTT	TAGCCTT	A	C	NM_006009.3:c.206A>C	p.(Asp69Ala)	0.00164828	0.00116349	0.00129028	0.00136735	2401
chr12:g.49580414T>C	EXON2	TAGACTT	TAGGCTT	A	G	NM_006009.3:c.206A>G	p.(Asp69Gly)	0.00417664	0.00202865	0.00257311	0.00292614	1333
chr12:g.49580414T>A	EXON2	TAGACTT	TAGTCTT	A	T	NM_006009.3:c.206A>T	p.(Asp69Val)	0.00183474	0.00105162	0.0013052	0.00139719	2371
chr12:g.49580413G>T	EXON2	AGACTTG	AGAATTG	C	A	NM_006009.3:c.207C>A	p.(Asp69Glu)	0.00146581	0.000891701	0.000916131	0.00109121	2838
chr12:g.49580413G>C	EXON2	AGACTTG	AGAGTTG	C	G	NM_006009.3:c.207C>G	p.(Asp69Glu)	0.00225368	0.00115433	0.00142917	0.00161239	2106
chr12:g.49580413G>A	EXON2	AGACTTG	AGATTTG	C	T	NM_006009.3:c.207C>T	p.(=)	0.00690763	0.00345076	0.00418367	0.00484735	533
chr12:g.49580412A>T	EXON2	GACTTGG	GACATGG	T	A	NM_006009.3:c.208T>A	p.(Leu70Met)	0.00104193	0.000667713	0.000777776	0.000829139	3465
chr12:g.49580412A>G	EXON2	GACTTGG	GACCTGG	T	C	NM_006009.3:c.208T>C	p.(=)	0.00369811	0.00203249	0.00225262	0.00266107	1462
chr12:g.49580412A>C	EXON2	GACTTGG	GACGTGG	T	G	NM_006009.3:c.208T>G	p.(Leu70Val)	0.00172431	0.000792451	0.000983226	0.00116666	2694
chr12:g.49580411A>T	EXON2	ACTTGGA	ACTAGGA	T	A	NM_006009.3:c.209T>A	p.(Leu70*)	0.000579909	0.000298239	0.000325853	0.000401334	4481
chr12:g.49580411A>G	EXON2	ACTTGGA	ACTCGGA	T	C	NM_006009.3:c.209T>C	p.(Leu70Ser)	0.00333033	0.00198273	0.00224784	0.0025203	1512
chr12:g.49580411A>C	EXON2	ACTTGGA	ACTGGGA	T	G	NM_006009.3:c.209T>G	p.(Leu70Trp)	0.00148015	0.00075112	0.00100518	0.00107881	2856
chr12:g.49580410C>T	EXON2	CTTGGAA	CTTAGAA	G	A	NM_006009.3:c.210G>A	p.(=)	0.00489605	0.00262542	0.0030689	0.00353012	1010
chr12:g.49580410C>G	EXON2	CTTGGAA	CTTCGAA	G	C	NM_006009.3:c.210G>C	p.(Leu70Phe)	0.00117079	0.000674094	0.000651919	0.000832269	3458
chr12:g.49580410C>A	EXON2	CTTGGAA	CTTTGAA	G	T	NM_006009.3:c.210G>T	p.(Leu70Phe)	0.00125506	0.00077166	0.000855921	0.000960879	3092
chr12:g.49580409C>T	EXON2	TTGGAAC	TTGAAAC	G	A	NM_006009.3:c.211G>A	p.(Glu71Lys)	0.00494264	0.00232378	0.00372543	0.00366395	941
chr12:g.49580409C>G	EXON2	TTGGAAC	TTGCAAC	G	C	NM_006009.3:c.211G>C	p.(Glu71Gln)	0.00199181	0.0011582	0.00121722	0.00145574	2286
chr12:g.49580409C>A	EXON2	TTGGAAC	TTGTAAC	G	T	NM_006009.3:c.211G>T	p.(Glu71*)	0.00174837	0.000796725	0.000995906	0.00118033	2671
chr12:g.49580408T>G	EXON2	TGGAACC	TGGCACC	A	C	NM_006009.3:c.212A>C	p.(Glu71Ala)	0.000800383	0.000508655	0.000523615	0.000610884	4095
chr12:g.49580408T>C	EXON2	TGGAACC	TGGGACC	A	G	NM_006009.3:c.212A>G	p.(Glu71Gly)	0.00204958	0.00110707	0.00125668	0.00147111	2264
chr12:g.49580408T>A	EXON2	TGGAACC	TGGTACC	A	T	NM_006009.3:c.212A>T	p.(Glu71Val)	0.000860225	0.000538575	0.000561016	0.000653272	3963
chr12:g.49580407T>G	EXON2	GGAACCC	GGACCCC	A	C	NM_006009.3:c.213A>C	p.(Glu71Asp)	0.00142729	0.00105233	0.0011249	0.00120151	2638
chr12:g.49580407T>C	EXON2	GGAACCC	GGAGCCC	A	G	NM_006009.3:c.213A>G	p.(=)	0.00557612	0.0036529	0.00428188	0.00450363	633
chr12:g.49580407T>A	EXON2	GGAACCC	GGATCCC	A	T	NM_006009.3:c.213A>T	p.(Glu71Asp)	0.00156035	0.000943465	0.001137	0.0012136	2616
chr12:g.49580406G>T	EXON2	GAACCCA	GAAACCA	C	A	NM_006009.3:c.214C>A	p.(Pro72Thr)	0.00318394	0.00173206	0.00198168	0.00229923	1606
chr12:g.49580406G>C	EXON2	GAACCCA	GAAGCCA	C	G	NM_006009.3:c.214C>G	p.(Pro72Ala)	0.00170149	0.000906785	0.00109527	0.00123452	2587
chr12:g.49580406G>A	EXON2	GAACCCA	GAATCCA	C	T	NM_006009.3:c.214C>T	p.(Pro72Ser)	0.0078554	0.00381563	0.00525731	0.00564278	342
chr12:g.49580405G>T	EXON2	AACCCAC	AACACAC	C	A	NM_006009.3:c.215C>A	p.(Pro72His)	0.00371047	0.00210339	0.00246577	0.00275988	1411
chr12:g.49580405G>C	EXON2	AACCCAC	AACGCAC	C	G	NM_006009.3:c.215C>G	p.(Pro72Arg)	0.00238699	0.00125258	0.00140226	0.00168061	2042
chr12:g.49580405G>A	EXON2	AACCCAC	AACTCAC	C	T	NM_006009.3:c.215C>T	p.(Pro72Leu)	0.00644409	0.00322205	0.00404134	0.00456916	615
chr12:g.49580404G>T	EXON2	ACCCACA	ACCAACA	C	A	NM_006009.3:c.216C>A	p.(=)	0.00143931	0.000807833	0.000967123	0.00107142	2874
chr12:g.49580404G>C	EXON2	ACCCACA	ACCGACA	C	G	NM_006009.3:c.216C>G	p.(=)	0.00123451	0.000512007	0.000733876	0.000826796	3476
chr12:g.49580404G>A	EXON2	ACCCACA	ACCTACA	C	T	NM_006009.3:c.216C>T	p.(=)	0.00533625	0.0027819	0.00325977	0.00379264	880
chr12:g.49580403T>G	EXON2	CCCACAG	CCCCCAG	A	C	NM_006009.3:c.217A>C	p.(Thr73Pro)	0.00131351	0.000869233	0.000936841	0.00103986	2950
chr12:g.49580403T>C	EXON2	CCCACAG	CCCGCAG	A	G	NM_006009.3:c.217A>G	p.(Thr73Ala)	0.00489668	0.00294091	0.00337552	0.0037377	908
chr12:g.49580403T>A	EXON2	CCCACAG	CCCTCAG	A	T	NM_006009.3:c.217A>T	p.(Thr73Ser)	0.000801626	0.000463591	0.000458762	0.00057466	4190
chr12:g.49580402G>T	EXON2	CCACAGT	CCAAAGT	C	A	NM_006009.3:c.218C>A	p.(Thr73Lys)	0.00158628	0.00105933	0.00115711	0.00126757	2530
chr12:g.49580402G>C	EXON2	CCACAGT	CCAGAGT	C	G	NM_006009.3:c.218C>G	p.(Thr73Arg)	0.00200457	0.00121687	0.00139071	0.00153738	2192
chr12:g.49580402G>A	EXON2	CCACAGT	CCATAGT	C	T	NM_006009.3:c.218C>T	p.(Thr73Ile)	0.00745875	0.00422645	0.00484031	0.0055085	375
chr12:g.49580401T>G	EXON2	CACAGTC	CACCGTC	A	C	NM_006009.3:c.219A>C	p.(=)	0.00198418	0.00101414	0.00110967	0.00136933	2399
chr12:g.49580401T>C	EXON2	CACAGTC	CACGGTC	A	G	NM_006009.3:c.219A>G	p.(=)	0.0053867	0.00295423	0.00348335	0.00394143	817
chr12:g.49580401T>A	EXON2	CACAGTC	CACTGTC	A	T	NM_006009.3:c.219A>T	p.(=)	0.00216056	0.0012493	0.00139628	0.00160205	2116
chr12:g.49580400C>T	EXON2	ACAGTCA	ACAATCA	G	A	NM_006009.3:c.220G>A	p.(Val74Ile)	0.0064463	0.00390591	0.00450872	0.00495364	500
chr12:g.49580400C>G	EXON2	ACAGTCA	ACACTCA	G	C	NM_006009.3:c.220G>C	p.(Val74Leu)	0.00194988	0.00117485	0.00140859	0.00151111	2218
chr12:g.49580400C>A	EXON2	ACAGTCA	ACATTCA	G	T	NM_006009.3:c.220G>T	p.(Val74Phe)	0.00135938	0.000793485	0.00094111	0.00103133	2965
chr12:g.49580399A>T	EXON2	CAGTCAT	CAGACAT	T	A	NM_006009.3:c.221T>A	p.(Val74Asp)	0.00185228	0.00106628	0.001048	0.00132219	2453
chr12:g.49580399A>G	EXON2	CAGTCAT	CAGCCAT	T	C	NM_006009.3:c.221T>C	p.(Val74Ala)	0.00376549	0.0021874	0.00247986	0.00281092	1390
chr12:g.49580399A>C	EXON2	CAGTCAT	CAGGCAT	T	G	NM_006009.3:c.221T>G	p.(Val74Gly)	0.00160856	0.00110893	0.00118205	0.00129985	2482
chr12:g.49580398G>T	EXON2	AGTCATT	AGTAATT	C	A	NM_006009.3:c.222C>A	p.(=)	0.00277062	0.00142275	0.00166942	0.00195426	1814
chr12:g.49580398G>C	EXON2	AGTCATT	AGTGATT	C	G	NM_006009.3:c.222C>G	p.(=)	0.00125537	0.000722387	0.00077965	0.000919135	3201
chr12:g.49580398G>A	EXON2	AGTCATT	AGTTATT	C	T	NM_006009.3:c.222C>T	p.(=)	0.00462945	0.00229931	0.00286753	0.00326543	1147
chr12:g.49580397T>G	EXON2	GTCATTG	GTCCTTG	A	C	NM_006009.3:c.223A>C	p.(Ile75Leu)	0.00106902	0.000515286	0.000669102	0.000751138	3679
chr12:g.49580397T>C	EXON2	GTCATTG	GTCGTTG	A	G	NM_006009.3:c.223A>G	p.(Ile75Val)	0.00750625	0.00424534	0.005199	0.0056502	340
chr12:g.49580397T>A	EXON2	GTCATTG	GTCTTTG	A	T	NM_006009.3:c.223A>T	p.(Ile75Phe)	0.00205345	0.000992117	0.00129206	0.00144588	2304
chr12:g.49580396A>T	EXON2	TCATTGG	TCAATGG	T	A	NM_006009.3:c.224T>A	p.(Ile75Asn)	0.00150053	0.000831978	0.000921118	0.00108454	2848
chr12:g.49580396A>G	EXON2	TCATTGG	TCACTGG	T	C	NM_006009.3:c.224T>C	p.(Ile75Thr)	0.0373276	0.0200269	0.0221663	0.0265069	71
chr12:g.49580396A>C	EXON2	TCATTGG	TCAGTGG	T	G	NM_006009.3:c.224T>G	p.(Ile75Ser)	0.00101026	0.000690839	0.000839406	0.000846835	3414
chr12:g.49580395A>T	EXON2	CATTGGT	CATAGGT	T	A	NM_006009.3:c.225T>A	p.(=)	0.00085214	0.00054679	0.000447373	0.000615434	4077
chr12:g.49580395A>G	EXON2	CATTGGT	CATCGGT	T	C	NM_006009.3:c.225T>C	p.(=)	0.00440982	0.0024357	0.00272685	0.00319079	1187
chr12:g.49580395A>C	EXON2	CATTGGT	CATGGGT	T	G	NM_006009.3:c.225T>G	p.(Ile75Met)	0.00134212	0.000816634	0.000951556	0.00103677	2955
chr12:g.49580394C>T	EXON2	ATTGGTG	ATTAGTG	G	A	NM_006009.3:c.226G>A	p.(Asp76Asn)	0.00515517	0.00281591	0.00321923	0.0037301	914
chr12:g.49580394C>G	EXON2	ATTGGTG	ATTCGTG	G	C	NM_006009.3:c.226G>C	p.(Asp76His)	0.00170861	0.000755309	0.000967969	0.00114396	2747
chr12:g.49580394C>A	EXON2	ATTGGTG	ATTTGTG	G	T	NM_006009.3:c.226G>T	p.(Asp76Tyr)	0.0032119	0.00181861	0.00216326	0.00239792	1560
chr12:g.49580393C>T	INTRON2	TTGGTGA	TTGATGA	G	A	NM_006009.3:c.226+1G>A		0.00773024	0.00410129	0.00509205	0.00564119	345
chr12:g.49580393C>G	INTRON2	TTGGTGA	TTGCTGA	G	C	NM_006009.3:c.226+1G>C		0.00223497	0.00122117	0.00135942	0.00160519	2114
chr12:g.49580393C>A	INTRON2	TTGGTGA	TTGTTGA	G	T	NM_006009.3:c.226+1G>T		0.00229257	0.00124997	0.00150918	0.00168391	2035
chr12:g.49580392A>T	INTRON2	TGGTGAG	TGGAGAG	T	A	NM_006009.3:c.226+2T>A		0.00112001	0.000585229	0.000630635	0.000778624	3615
chr12:g.49580392A>G	INTRON2	TGGTGAG	TGGCGAG	T	C	NM_006009.3:c.226+2T>C		0.00431354	0.0026083	0.00295642	0.00329275	1136
chr12:g.49580392A>C	INTRON2	TGGTGAG	TGGGGAG	T	G	NM_006009.3:c.226+2T>G		0.00128145	0.000852618	0.00094343	0.00102583	2979
chr12:g.49580391C>T	INTRON2	GGTGAGT	GGTAAGT	G	A	NM_006009.3:c.226+3G>A		0.00644872	0.00322903	0.00403162	0.00456979	613
chr12:g.49580391C>G	INTRON2	GGTGAGT	GGTCAGT	G	C	NM_006009.3:c.226+3G>C		0.00120389	0.000625274	0.000690601	0.00083992	3436
chr12:g.49580391C>A	INTRON2	GGTGAGT	GGTTAGT	G	T	NM_006009.3:c.226+3G>T		0.00114789	0.000671936	0.000849253	0.000889693	3305
chr12:g.49580390T>G	INTRON2	GTGAGTT	GTGCGTT	A	C	NM_006009.3:c.226+4A>C		0.000951638	0.000513474	0.00057509	0.000680067	3879
chr12:g.49580390T>C	INTRON2	GTGAGTT	GTGGGTT	A	G	NM_006009.3:c.226+4A>G		0.00282753	0.00180058	0.00197859	0.00220223	1658
chr12:g.49580390T>A	INTRON2	GTGAGTT	GTGTGTT	A	T	NM_006009.3:c.226+4A>T		0.00106803	0.000602476	0.000698324	0.000789608	3574
chr12:g.49580389C>T	INTRON2	TGAGTTG	TGAATTG	G	A	NM_006009.3:c.226+5G>A		0.00737609	0.00395148	0.00488007	0.00540255	396
chr12:g.49580389C>G	INTRON2	TGAGTTG	TGACTTG	G	C	NM_006009.3:c.226+5G>C		0.00198232	0.0012513	0.00133692	0.00152351	2204
chr12:g.49580389C>A	INTRON2	TGAGTTG	TGATTTG	G	T	NM_006009.3:c.226+5G>T		0.00156083	0.000915425	0.000994455	0.0011569	2720
chr12:g.49580388A>T	INTRON2	GAGTTGA	GAGATGA	T	A	NM_006009.3:c.226+6T>A		0.0024151	0.00144906	0.00160275	0.00182231	1916
chr12:g.49580388A>G	INTRON2	GAGTTGA	GAGCTGA	T	C	NM_006009.3:c.226+6T>C		0.00949942	0.00508636	0.00575966	0.00678181	182
chr12:g.49580388A>C	INTRON2	GAGTTGA	GAGGTGA	T	G	NM_006009.3:c.226+6T>G		0.00258343	0.0013832	0.0014637	0.00181011	1924
chr12:g.49580387A>T	INTRON2	AGTTGAC	AGTAGAC	T	A	NM_006009.3:c.226+7T>A		0.000773359	0.000427079	0.000496335	0.000565591	4219
chr12:g.49580387A>G	INTRON2	AGTTGAC	AGTCGAC	T	C	NM_006009.3:c.226+7T>C		0.00233162	0.00137358	0.00152363	0.00174294	1977
chr12:g.49580387A>C	INTRON2	AGTTGAC	AGTGGAC	T	G	NM_006009.3:c.226+7T>G		0.00120044	0.000577134	0.000657933	0.000811835	3523
chr12:g.49580386C>T	INTRON2	GTTGACC	GTTAACC	G	A	NM_006009.3:c.226+8G>A		0.00346106	0.00224263	0.00241921	0.00270763	1440
chr12:g.49580386C>G	INTRON2	GTTGACC	GTTCACC	G	C	NM_006009.3:c.226+8G>C		0.00167756	0.000865266	0.00123609	0.00125964	2538
chr12:g.49580386C>A	INTRON2	GTTGACC	GTTTACC	G	T	NM_006009.3:c.226+8G>T		0.00155395	0.00081229	0.000918241	0.00109483	2829
chr12:g.49580385T>G	INTRON2	TTGACCT	TTGCCCT	A	C	NM_006009.3:c.226+9A>C		0.00110503	0.000645711	0.000745563	0.000832102	3459
chr12:g.49580385T>C	INTRON2	TTGACCT	TTGGCCT	A	G	NM_006009.3:c.226+9A>G		0.00392086	0.00240977	0.00267604	0.00300222	1293
chr12:g.49580385T>A	INTRON2	TTGACCT	TTGTCCT	A	T	NM_006009.3:c.226+9A>T		0.00161761	0.000985209	0.00103181	0.00121154	2617
chr12:g.49580384G>T	INTRON2	TGACCTC	TGAACTC	C	A	NM_006009.3:c.226+10C>A		0.00284528	0.00153283	0.00174664	0.00204159	1755
chr12:g.49580384G>C	INTRON2	TGACCTC	TGAGCTC	C	G	NM_006009.3:c.226+10C>G		0.00121048	0.000736813	0.000743392	0.000896895	3267
chr12:g.49580384G>A	INTRON2	TGACCTC	TGATCTC	C	T	NM_006009.3:c.226+10C>T		0.00714446	0.0036413	0.00483863	0.00520813	440
chr12:g.49580383G>T	INTRON2	GACCTCA	GACATCA	C	A	NM_006009.3:c.226+11C>A		0.00150389	0.000751947	0.000873228	0.00104302	2942
chr12:g.49580383G>C	INTRON2	GACCTCA	GACGTCA	C	G	NM_006009.3:c.226+11C>G		0.00159688	0.000715562	0.000941955	0.0010848	2847
chr12:g.49580383G>A	INTRON2	GACCTCA	GACTTCA	C	T	NM_006009.3:c.226+11C>T		0.00705455	0.00350908	0.00443487	0.0049995	487
chr12:g.49580382A>T	INTRON2	ACCTCAG	ACCACAG	T	A	NM_006009.3:c.226+12T>A		0.000833224	0.000431432	0.000513766	0.000592807	4150
chr12:g.49580382A>G	INTRON2	ACCTCAG	ACCCCAG	T	C	NM_006009.3:c.226+12T>C		0.00171585	0.00103412	0.00126136	0.00133711	2431
chr12:g.49580382A>C	INTRON2	ACCTCAG	ACCGCAG	T	G	NM_006009.3:c.226+12T>G		0.000905678	0.000490713	0.000612568	0.000669653	3913
chr12:g.49580381G>T	INTRON2	CCTCAGT	CCTAAGT	C	A	NM_006009.3:c.226+13C>A		0.000784593	0.000387135	0.000511018	0.000560915	4231
chr12:g.49580381G>C	INTRON2	CCTCAGT	CCTGAGT	C	G	NM_006009.3:c.226+13C>G		0.00139885	0.000851696	0.000960094	0.00107021	2878
chr12:g.49580381G>A	INTRON2	CCTCAGT	CCTTAGT	C	T	NM_006009.3:c.226+13C>T		0.00490371	0.00246734	0.00290093	0.00342399	1076
chr12:g.49580380T>G	INTRON2	CTCAGTA	CTCCGTA	A	C	NM_006009.3:c.226+14A>C		0.00211228	0.000853034	0.00102229	0.0013292	2435
chr12:g.49580380T>C	INTRON2	CTCAGTA	CTCGGTA	A	G	NM_006009.3:c.226+14A>G		0.00581553	0.00318195	0.00363555	0.00421101	727
chr12:g.49580380T>A	INTRON2	CTCAGTA	CTCTGTA	A	T	NM_006009.3:c.226+14A>T		0.00130663	0.000812414	0.000839494	0.00098618	3042
chr12:g.49580379C>T	INTRON2	TCAGTAA	TCAATAA	G	A	NM_006009.3:c.226+15G>A		0.00874493	0.00562704	0.00624072	0.0068709	176
chr12:g.49580379C>G	INTRON2	TCAGTAA	TCACTAA	G	C	NM_006009.3:c.226+15G>C		0.00205879	0.00109373	0.00126695	0.00147316	2260
chr12:g.49580379C>A	INTRON2	TCAGTAA	TCATTAA	G	T	NM_006009.3:c.226+15G>T		0.00147481	0.000682965	0.000895774	0.00101785	2991
chr12:g.49580378A>T	INTRON2	CAGTAAC	CAGAAAC	T	A	NM_006009.3:c.226+16T>A		0.000873904	0.000498125	0.000585516	0.000652515	3965
chr12:g.49580378A>G	INTRON2	CAGTAAC	CAGCAAC	T	C	NM_006009.3:c.226+16T>C		0.00360923	0.00210611	0.00227215	0.00266249	1459
chr12:g.49580378A>C	INTRON2	CAGTAAC	CAGGAAC	T	G	NM_006009.3:c.226+16T>G		0.000891382	0.000672906	0.000655428	0.000739905	3715
chr12:g.49580377T>G	INTRON2	AGTAACC	AGTCACC	A	C	NM_006009.3:c.226+17A>C		0.000859762	0.000593357	0.000617575	0.000690231	3842
chr12:g.49580377T>C	INTRON2	AGTAACC	AGTGACC	A	G	NM_006009.3:c.226+17A>G		0.00238554	0.00135624	0.0015621	0.00176796	1951
chr12:g.49580377T>A	INTRON2	AGTAACC	AGTTACC	A	T	NM_006009.3:c.226+17A>T		0.00118671	0.00053281	0.000569138	0.000762887	3656
chr12:g.49580376T>G	INTRON2	GTAACCC	GTACCCC	A	C	NM_006009.3:c.226+18A>C		0.0010757	0.000783985	0.00100277	0.000954152	3109
chr12:g.49580376T>C	INTRON2	GTAACCC	GTAGCCC	A	G	NM_006009.3:c.226+18A>G		0.00333649	0.00165913	0.00211494	0.00237019	1576
chr12:g.49580376T>A	INTRON2	GTAACCC	GTATCCC	A	T	NM_006009.3:c.226+18A>T		0.00145858	0.00103924	0.00111217	0.00120333	2632
chr12:g.49580375G>T	INTRON2	TAACCCA	TAAACCA	C	A	NM_006009.3:c.226+19C>A		0.00420054	0.00239781	0.00250282	0.00303372	1279
chr12:g.49580375G>C	INTRON2	TAACCCA	TAAGCCA	C	G	NM_006009.3:c.226+19C>G		0.00190775	0.000971375	0.00117265	0.00135059	2421
chr12:g.49580375G>A	INTRON2	TAACCCA	TAATCCA	C	T	NM_006009.3:c.226+19C>T		0.00817355	0.00443682	0.00541695	0.00600911	267
chr12:g.49580374G>T	INTRON2	AACCCAA	AACACAA	C	A	NM_006009.3:c.226+20C>A		0.0037952	0.00218479	0.00244782	0.00280927	1391
chr12:g.49580374G>C	INTRON2	AACCCAA	AACGCAA	C	G	NM_006009.3:c.226+20C>G		0.00224384	0.00115413	0.00126149	0.00155315	2168
chr12:g.49580374G>A	INTRON2	AACCCAA	AACTCAA	C	T	NM_006009.3:c.226+20C>T		0.00606051	0.00308125	0.00382204	0.00432127	689
chr12:g.49580261A>T	INTRON2	TCCTCCC	TCCACCC	T	A	NM_006009.3:c.227-20T>A		0.000897861	0.000457531	0.000560733	0.000638708	4008
chr12:g.49580261A>G	INTRON2	TCCTCCC	TCCCCCC	T	C	NM_006009.3:c.227-20T>C		0.00202965	0.0010045	0.00133131	0.00145515	2290
chr12:g.49580261A>C	INTRON2	TCCTCCC	TCCGCCC	T	G	NM_006009.3:c.227-20T>G		0.000794658	0.000536652	0.000557293	0.000629534	4032
chr12:g.49580260G>T	INTRON2	CCTCCCC	CCTACCC	C	A	NM_006009.3:c.227-19C>A		0.00241741	0.00118283	0.00153399	0.00171141	2008
chr12:g.49580260G>C	INTRON2	CCTCCCC	CCTGCCC	C	G	NM_006009.3:c.227-19C>G		0.00169663	0.000931481	0.00113848	0.00125553	2548
chr12:g.49580260G>A	INTRON2	CCTCCCC	CCTTCCC	C	T	NM_006009.3:c.227-19C>T		0.00793237	0.0042545	0.00553714	0.005908	287
chr12:g.49580259G>T	INTRON2	CTCCCCC	CTCACCC	C	A	NM_006009.3:c.227-18C>A		0.00198584	0.00113663	0.0013326	0.00148502	2249
chr12:g.49580259G>C	INTRON2	CTCCCCC	CTCGCCC	C	G	NM_006009.3:c.227-18C>G		0.00125421	0.000672833	0.000731624	0.000886223	3317
chr12:g.49580259G>A	INTRON2	CTCCCCC	CTCTCCC	C	T	NM_006009.3:c.227-18C>T		0.00967443	0.00524549	0.00663688	0.0071856	154
chr12:g.49580258G>T	INTRON2	TCCCCCA	TCCACCA	C	A	NM_006009.3:c.227-17C>A		0.00161045	0.000901444	0.00103818	0.00118336	2662
chr12:g.49580258G>C	INTRON2	TCCCCCA	TCCGCCA	C	G	NM_006009.3:c.227-17C>G		0.00214726	0.00109895	0.00116479	0.00147033	2267
chr12:g.49580258G>A	INTRON2	TCCCCCA	TCCTCCA	C	T	NM_006009.3:c.227-17C>T		0.0080269	0.00418817	0.00510481	0.00577329	312
chr12:g.49580257G>T	INTRON2	CCCCCAT	CCCACAT	C	A	NM_006009.3:c.227-16C>A		0.00229797	0.00130549	0.00148109	0.00169485	2023
chr12:g.49580257G>C	INTRON2	CCCCCAT	CCCGCAT	C	G	NM_006009.3:c.227-16C>G		0.00409971	0.00216055	0.00256518	0.00294181	1330
chr12:g.49580257G>A	INTRON2	CCCCCAT	CCCTCAT	C	T	NM_006009.3:c.227-16C>T		0.00735962	0.00361874	0.0045425	0.00517362	448
chr12:g.49580256G>T	INTRON2	CCCCATC	CCCAATC	C	A	NM_006009.3:c.227-15C>A		0.00166836	0.000896745	0.00106775	0.00121095	2623
chr12:g.49580256G>C	INTRON2	CCCCATC	CCCGATC	C	G	NM_006009.3:c.227-15C>G		0.00111363	0.000629807	0.000738251	0.00082723	3471
chr12:g.49580256G>A	INTRON2	CCCCATC	CCCTATC	C	T	NM_006009.3:c.227-15C>T		0.00713642	0.00358281	0.00421679	0.00497867	492
chr12:g.49580255T>G	INTRON2	CCCATCA	CCCCTCA	A	C	NM_006009.3:c.227-14A>C		0.00104689	0.000579348	0.000655578	0.000760606	3658
chr12:g.49580255T>C	INTRON2	CCCATCA	CCCGTCA	A	G	NM_006009.3:c.227-14A>G		0.00796349	0.00459413	0.00533102	0.00596288	275
chr12:g.49580255T>A	INTRON2	CCCATCA	CCCTTCA	A	T	NM_006009.3:c.227-14A>T		0.0013823	0.000797874	0.00086394	0.00101471	2995
chr12:g.49580254A>T	INTRON2	CCATCAT	CCAACAT	T	A	NM_006009.3:c.227-13T>A		0.00226441	0.00127439	0.00145344	0.00166408	2056
chr12:g.49580254A>G	INTRON2	CCATCAT	CCACCAT	T	C	NM_006009.3:c.227-13T>C		0.00561889	0.00343874	0.00386003	0.00430589	695
chr12:g.49580254A>C	INTRON2	CCATCAT	CCAGCAT	T	G	NM_006009.3:c.227-13T>G		0.000863635	0.000484478	0.000574001	0.000640705	4000
chr12:g.49580253G>T	INTRON2	CATCATG	CATAATG	C	A	NM_006009.3:c.227-12C>A		0.00157715	0.0010495	0.00107269	0.00123311	2592
chr12:g.49580253G>C	INTRON2	CATCATG	CATGATG	C	G	NM_006009.3:c.227-12C>G		0.00291657	0.00156555	0.0017569	0.00207967	1728
chr12:g.49580253G>A	INTRON2	CATCATG	CATTATG	C	T	NM_006009.3:c.227-12C>T		0.00475464	0.00240631	0.00309052	0.00341716	1077
chr12:g.49580252T>G	INTRON2	ATCATGT	ATCCTGT	A	C	NM_006009.3:c.227-11A>C		0.0015486	0.000952981	0.00104729	0.00118295	2665
chr12:g.49580252T>C	INTRON2	ATCATGT	ATCGTGT	A	G	NM_006009.3:c.227-11A>G		0.00798122	0.00426856	0.00518184	0.00581054	308
chr12:g.49580252T>A	INTRON2	ATCATGT	ATCTTGT	A	T	NM_006009.3:c.227-11A>T		0.00202012	0.00109692	0.00134509	0.00148738	2245
chr12:g.49580251A>T	INTRON2	TCATGTT	TCAAGTT	T	A	NM_006009.3:c.227-10T>A		0.00212102	0.00110862	0.00130943	0.00151302	2212
chr12:g.49580251A>G	INTRON2	TCATGTT	TCACGTT	T	C	NM_006009.3:c.227-10T>C		0.0107557	0.00620409	0.00707843	0.00801274	125
chr12:g.49580251A>C	INTRON2	TCATGTT	TCAGGTT	T	G	NM_006009.3:c.227-10T>G		0.00151442	0.000840878	0.00100822	0.00112117	2788
chr12:g.49580250C>T	INTRON2	CATGTTC	CATATTC	G	A	NM_006009.3:c.227-9G>A		0.00901915	0.0046204	0.00554675	0.00639543	217
chr12:g.49580250C>G	INTRON2	CATGTTC	CATCTTC	G	C	NM_006009.3:c.227-9G>C		0.00146057	0.000761541	0.000971817	0.00106464	2885
chr12:g.49580250C>A	INTRON2	CATGTTC	CATTTTC	G	T	NM_006009.3:c.227-9G>T		0.0019891	0.00108548	0.00129576	0.00145678	2284
chr12:g.49580249A>T	INTRON2	ATGTTCT	ATGATCT	T	A	NM_006009.3:c.227-8T>A		0.00119717	0.000719021	0.000855635	0.000923942	3184
chr12:g.49580249A>G	INTRON2	ATGTTCT	ATGCTCT	T	C	NM_006009.3:c.227-8T>C		0.00430694	0.00255972	0.00285092	0.00323919	1163
chr12:g.49580249A>C	INTRON2	ATGTTCT	ATGGTCT	T	G	NM_006009.3:c.227-8T>G		0.00133738	0.00084485	0.000927537	0.00103659	2956
chr12:g.49580248A>T	INTRON2	TGTTCTC	TGTACTC	T	A	NM_006009.3:c.227-7T>A		0.000765195	0.000506486	0.00051013	0.000593937	4149
chr12:g.49580248A>G	INTRON2	TGTTCTC	TGTCCTC	T	C	NM_006009.3:c.227-7T>C		0.00255429	0.0015559	0.00180003	0.00197007	1804
chr12:g.49580248A>C	INTRON2	TGTTCTC	TGTGCTC	T	G	NM_006009.3:c.227-7T>G		0.000615799	0.000346159	0.000368022	0.000443327	4430
chr12:g.49580247G>T	INTRON2	GTTCTCC	GTTATCC	C	A	NM_006009.3:c.227-6C>A		0.00202336	0.000937134	0.00127081	0.00141043	2350
chr12:g.49580247G>C	INTRON2	GTTCTCC	GTTGTCC	C	G	NM_006009.3:c.227-6C>G		0.00159029	0.000866139	0.000951333	0.00113592	2761
chr12:g.49580247G>A	INTRON2	GTTCTCC	GTTTTCC	C	T	NM_006009.3:c.227-6C>T		0.00526783	0.00291079	0.00342196	0.00386686	848
chr12:g.49580246A>T	INTRON2	TTCTCCA	TTCACCA	T	A	NM_006009.3:c.227-5T>A		0.000774055	0.000485903	0.000610204	0.000623387	4051
chr12:g.49580246A>G	INTRON2	TTCTCCA	TTCCCCA	T	C	NM_006009.3:c.227-5T>C		0.00288152	0.00180236	0.00205379	0.00224589	1636
chr12:g.49580246A>C	INTRON2	TTCTCCA	TTCGCCA	T	G	NM_006009.3:c.227-5T>G		0.00073168	0.000392678	0.000477428	0.000533929	4283
chr12:g.49580245G>T	INTRON2	TCTCCAG	TCTACAG	C	A	NM_006009.3:c.227-4C>A		0.00119363	0.000631692	0.000852591	0.000892637	3289
chr12:g.49580245G>C	INTRON2	TCTCCAG	TCTGCAG	C	G	NM_006009.3:c.227-4C>G		0.00273604	0.00137577	0.00157729	0.00189637	1859
chr12:g.49580245G>A	INTRON2	TCTCCAG	TCTTCAG	C	T	NM_006009.3:c.227-4C>T		0.00476676	0.00241826	0.00309646	0.00342716	1069
chr12:g.49580244G>T	INTRON2	CTCCAGA	CTCAAGA	C	A	NM_006009.3:c.227-3C>A		0.000889137	0.000485374	0.000592758	0.000655756	3954
chr12:g.49580244G>C	INTRON2	CTCCAGA	CTCGAGA	C	G	NM_006009.3:c.227-3C>G		0.000545509	0.000365105	0.000416649	0.000442421	4432
chr12:g.49580244G>A	INTRON2	CTCCAGA	CTCTAGA	C	T	NM_006009.3:c.227-3C>T		0.00503415	0.00250848	0.00296379	0.00350214	1025
chr12:g.49580243T>G	INTRON2	TCCAGAT	TCCCGAT	A	C	NM_006009.3:c.227-2A>C		0.000929892	0.000539937	0.000581932	0.00068392	3870
chr12:g.49580243T>C	INTRON2	TCCAGAT	TCCGGAT	A	G	NM_006009.3:c.227-2A>G		0.00442149	0.0025497	0.00280167	0.00325762	1153
chr12:g.49580243T>A	INTRON2	TCCAGAT	TCCTGAT	A	T	NM_006009.3:c.227-2A>T		0.000851901	0.000461946	0.000527939	0.000613929	4083
chr12:g.49580242C>T	INTRON2	CCAGATG	CCAAATG	G	A	NM_006009.3:c.227-1G>A		0.00412842	0.00213352	0.00268197	0.0029813	1308
chr12:g.49580242C>G	INTRON2	CCAGATG	CCACATG	G	C	NM_006009.3:c.227-1G>C		0.00281456	0.00148262	0.00180204	0.00203307	1763
chr12:g.49580242C>A	INTRON2	CCAGATG	CCATATG	G	T	NM_006009.3:c.227-1G>T		0.00155494	0.0007172	0.000873899	0.00104868	2925
chr12:g.49580241T>G	EXON3	CAGATGA	CAGCTGA	A	C	NM_006009.3:c.227A>C	p.(Asp76Ala)	0.000815965	0.000464406	0.000516489	0.000598953	4132
chr12:g.49580241T>C	EXON3	CAGATGA	CAGGTGA	A	G	NM_006009.3:c.227A>G	p.(Asp76Gly)	0.00588971	0.00335501	0.00375431	0.00433301	686
chr12:g.49580241T>A	EXON3	CAGATGA	CAGTTGA	A	T	NM_006009.3:c.227A>T	p.(Asp76Val)	0.00187064	0.00116752	0.00125433	0.00143083	2318
chr12:g.49580240A>T	EXON3	AGATGAA	AGAAGAA	T	A	NM_006009.3:c.228T>A	p.(Asp76Glu)	0.00273364	0.00145904	0.00160725	0.00193331	1832
chr12:g.49580240A>G	EXON3	AGATGAA	AGACGAA	T	C	NM_006009.3:c.228T>C	p.(=)	0.00844136	0.00470319	0.00537836	0.0061743	245
chr12:g.49580240A>C	EXON3	AGATGAA	AGAGGAA	T	G	NM_006009.3:c.228T>G	p.(Asp76Glu)	0.0019893	0.00108358	0.00119885	0.00142391	2334
chr12:g.49580239C>T	EXON3	GATGAAG	GATAAAG	G	A	NM_006009.3:c.229G>A	p.(Glu77Lys)	0.00510199	0.00261772	0.00315666	0.00362546	956
chr12:g.49580239C>G	EXON3	GATGAAG	GATCAAG	G	C	NM_006009.3:c.229G>C	p.(Glu77Gln)	0.000708324	0.000420888	0.000487615	0.000538942	4271
chr12:g.49580239C>A	EXON3	GATGAAG	GATTAAG	G	T	NM_006009.3:c.229G>T	p.(Glu77*)	0.00143718	0.000821246	0.00107275	0.00111039	2809
chr12:g.49580238T>G	EXON3	ATGAAGT	ATGCAGT	A	C	NM_006009.3:c.230A>C	p.(Glu77Ala)	0.00135043	0.000842302	0.000943012	0.00104525	2937
chr12:g.49580238T>C	EXON3	ATGAAGT	ATGGAGT	A	G	NM_006009.3:c.230A>G	p.(Glu77Gly)	0.00174869	0.00113528	0.00123141	0.00137179	2397
chr12:g.49580238T>A	EXON3	ATGAAGT	ATGTAGT	A	T	NM_006009.3:c.230A>T	p.(Glu77Val)	0.000659193	0.00040284	0.000485239	0.000515757	4316
chr12:g.49580237T>G	EXON3	TGAAGTT	TGACGTT	A	C	NM_006009.3:c.231A>C	p.(Glu77Asp)	0.00162738	0.000863863	0.000990388	0.00116054	2714
chr12:g.49580237T>C	EXON3	TGAAGTT	TGAGGTT	A	G	NM_006009.3:c.231A>G	p.(=)	0.00397028	0.00236908	0.00258286	0.00297407	1314
chr12:g.49580237T>A	EXON3	TGAAGTT	TGATGTT	A	T	NM_006009.3:c.231A>T	p.(Glu77Asp)	0.00125653	0.000820234	0.000868226	0.000981663	3050
chr12:g.49580236C>T	EXON3	GAAGTTC	GAAATTC	G	A	NM_006009.3:c.232G>A	p.(Val78Ile)	0.00601299	0.00309969	0.00413523	0.00441597	663
chr12:g.49580236C>G	EXON3	GAAGTTC	GAACTTC	G	C	NM_006009.3:c.232G>C	p.(Val78Leu)	0.00182944	0.000918172	0.00124264	0.00133008	2434
chr12:g.49580236C>A	EXON3	GAAGTTC	GAATTTC	G	T	NM_006009.3:c.232G>T	p.(Val78Phe)	0.00298924	0.00149807	0.00176041	0.00208257	1726
chr12:g.49580235A>T	EXON3	AAGTTCG	AAGATCG	T	A	NM_006009.3:c.233T>A	p.(Val78Asp)	0.00298266	0.00149133	0.00161561	0.00202987	1766
chr12:g.49580235A>G	EXON3	AAGTTCG	AAGCTCG	T	C	NM_006009.3:c.233T>C	p.(Val78Ala)	0.00478469	0.00236127	0.00254769	0.00323122	1166
chr12:g.49580235A>C	EXON3	AAGTTCG	AAGGTCG	T	G	NM_006009.3:c.233T>G	p.(Val78Gly)	0.0019263	0.00161561	0.00130492	0.00161561	2100
chr12:g.49580234A>T	EXON3	AGTTCGC	AGTACGC	T	A	NM_006009.3:c.234T>A	p.(=)	0.000856688	0.000244768	0.000734304	0.00061192	4091
chr12:g.49580234A>G	EXON3	AGTTCGC	AGTCCGC	T	C	NM_006009.3:c.234T>C	p.(=)	0.00269245	0.00171338	0.00195815	0.00212132	1710
chr12:g.49580234A>C	EXON3	AGTTCGC	AGTGCGC	T	G	NM_006009.3:c.234T>G	p.(=)	0.000489536	0.000367152	0.00061192	0.000489536	4362
chr12:g.49580233G>T	EXON3	GTTCGCA	GTTAGCA	C	A	NM_006009.3:c.235C>A	p.(Arg79Ser)	0.00505476	0.00264773	0.00324949	0.00365066	946
chr12:g.49580233G>C	EXON3	GTTCGCA	GTTGGCA	C	G	NM_006009.3:c.235C>G	p.(Arg79Gly)	0.00457335	0.00349019	0.00312914	0.00373089	912
chr12:g.49580233G>A	EXON3	GTTCGCA	GTTTGCA	C	T	NM_006009.3:c.235C>T	p.(Arg79Cys)	0.0865327	0.0488627	0.0577687	0.064388	27
chr12:g.49580232C>T	EXON3	TTCGCAC	TTCACAC	G	A	NM_006009.3:c.236G>A	p.(Arg79His)	0.10409	0.0582491	0.0700827	0.077474	9
chr12:g.49580232C>G	EXON3	TTCGCAC	TTCCCAC	G	C	NM_006009.3:c.236G>C	p.(Arg79Pro)	0.00907629	0.0044807	0.00551471	0.00635723	220
chr12:g.49580232C>A	EXON3	TTCGCAC	TTCTCAC	G	T	NM_006009.3:c.236G>T	p.(Arg79Leu)	0.00919118	0.00539982	0.00769761	0.00742953	138
chr12:g.49580231G>T	EXON3	TCGCACT	TCGAACT	C	A	NM_006009.3:c.237C>A	p.(=)	0.000955531	0.00102903	0.000808526	0.00093103	3167
chr12:g.49580231G>C	EXON3	TCGCACT	TCGGACT	C	G	NM_006009.3:c.237C>G	p.(=)	0.000882029	0.000514517	0.000441014	0.00061252	4088
chr12:g.49580231G>A	EXON3	TCGCACT	TCGTACT	C	T	NM_006009.3:c.237C>T	p.(=)	0.00529217	0.00338111	0.00396913	0.00421414	726
chr12:g.49580230T>G	EXON3	CGCACTG	CGCCCTG	A	C	NM_006009.3:c.238A>C	p.(Thr80Pro)	0.002598	0.00127013	0.00184747	0.0019052	1851
chr12:g.49580230T>C	EXON3	CGCACTG	CGCGCTG	A	G	NM_006009.3:c.238A>G	p.(Thr80Ala)	0.00698574	0.00461867	0.0048496	0.00548467	382
chr12:g.49580230T>A	EXON3	CGCACTG	CGCTCTG	A	T	NM_006009.3:c.238A>T	p.(Thr80Ser)	0.00219387	0.0015588	0.001732	0.00182822	1914
chr12:g.49580229G>T	EXON3	GCACTGG	GCAATGG	C	A	NM_006009.3:c.239C>A	p.(Thr80Asn)	0.00166616	0.000767742	0.00102093	0.00115161	2729
chr12:g.49580229G>C	EXON3	GCACTGG	GCAGTGG	C	G	NM_006009.3:c.239C>G	p.(Thr80Ser)	0.00312814	0.00184585	0.00214804	0.00237401	1572
chr12:g.49580229G>A	EXON3	GCACTGG	GCATTGG	C	T	NM_006009.3:c.239C>T	p.(Thr80Ile)	0.00807762	0.00530069	0.00592958	0.00643596	209
chr12:g.49580228A>T	EXON3	CACTGGC	CACAGGC	T	A	NM_006009.3:c.240T>A	p.(=)	0.00118383	0.000838241	0.000764712	0.000928928	3173
chr12:g.49580228A>G	EXON3	CACTGGC	CACCGGC	T	C	NM_006009.3:c.240T>C	p.(=)	0.00595593	0.00364709	0.0041618	0.00458827	606
chr12:g.49580228A>C	EXON3	CACTGGC	CACGGGC	T	G	NM_006009.3:c.240T>G	p.(=)	0.00117648	0.000595593	0.000808829	0.0008603	3377
chr12:g.49580227C>T	EXON3	ACTGGCA	ACTAGCA	G	A	NM_006009.3:c.241G>A	p.(Gly81Ser)	0.00460563	0.00234184	0.00260205	0.00318317	1195
chr12:g.49580227C>G	EXON3	ACTGGCA	ACTCGCA	G	C	NM_006009.3:c.241G>C	p.(Gly81Arg)	0.000722069	0.000338266	0.000357782	0.000472706	4387
chr12:g.49580227C>A	EXON3	ACTGGCA	ACTTGCA	G	T	NM_006009.3:c.241G>T	p.(Gly81Cys)	0.0011384	0.000676533	0.000741584	0.000852171	3398
chr12:g.49580226C>T	EXON3	CTGGCAC	CTGACAC	G	A	NM_006009.3:c.242G>A	p.(Gly81Asp)	0.0069396	0.00376824	0.00466715	0.005125	459
chr12:g.49580226C>G	EXON3	CTGGCAC	CTGCCAC	G	C	NM_006009.3:c.242G>C	p.(Gly81Ala)	0.00144545	0.000755086	0.000927677	0.00104274	2943
chr12:g.49580226C>A	EXON3	CTGGCAC	CTGTCAC	G	T	NM_006009.3:c.242G>T	p.(Gly81Val)	0.00207109	0.00110746	0.00128005	0.0014862	2248
chr12:g.49580225G>T	EXON3	TGGCACC	TGGAACC	C	A	NM_006009.3:c.243C>A	p.(=)	0.00208051	0.000977591	0.00131181	0.00145664	2285
chr12:g.49580225G>C	EXON3	TGGCACC	TGGGACC	C	G	NM_006009.3:c.243C>G	p.(=)	0.000902391	0.000417774	0.000518039	0.000612735	4087
chr12:g.49580225G>A	EXON3	TGGCACC	TGGTACC	C	T	NM_006009.3:c.243C>T	p.(=)	0.00646714	0.00349259	0.00411089	0.00469021	580
chr12:g.49580224T>G	EXON3	GGCACCT	GGCCCCT	A	C	NM_006009.3:c.244A>C	p.(Thr82Pro)	0.00126842	0.000743554	0.000831031	0.000947667	3120
chr12:g.49580224T>C	EXON3	GGCACCT	GGCGCCT	A	G	NM_006009.3:c.244A>G	p.(Thr82Ala)	0.00805517	0.00572974	0.00642227	0.00673572	186
chr12:g.49580224T>A	EXON3	GGCACCT	GGCTCCT	A	T	NM_006009.3:c.244A>T	p.(Thr82Ser)	0.0012101	0.000663367	0.000736264	0.00086991	3358
chr12:g.49580223G>T	EXON3	GCACCTA	GCAACTA	C	A	NM_006009.3:c.245C>A	p.(Thr82Asn)	0.00326935	0.00165437	0.0020614	0.00232837	1589
chr12:g.49580223G>C	EXON3	GCACCTA	GCAGCTA	C	G	NM_006009.3:c.245C>G	p.(Thr82Ser)	0.00224521	0.00116856	0.0015362	0.00164999	2070
chr12:g.49580223G>A	EXON3	GCACCTA	GCATCTA	C	T	NM_006009.3:c.245C>T	p.(Thr82Ile)	0.00929597	0.00518631	0.00652556	0.00700262	168
chr12:g.49580222G>T	EXON3	CACCTAC	CACATAC	C	A	NM_006009.3:c.246C>A	p.(=)	0.00193223	0.00145967	0.00141767	0.00160319	2115
chr12:g.49580222G>C	EXON3	CACCTAC	CACGTAC	C	G	NM_006009.3:c.246C>G	p.(=)	0.00224726	0.00102912	0.00118664	0.00148767	2244
chr12:g.49580222G>A	EXON3	CACCTAC	CACTTAC	C	T	NM_006009.3:c.246C>T	p.(=)	0.00627973	0.00339189	0.00381194	0.00449452	635
chr12:g.49580221A>T	EXON3	ACCTACC	ACCAACC	T	A	NM_006009.3:c.247T>A	p.(Tyr83Asn)	0.00100789	0.000693745	0.000837729	0.000846456	3415
chr12:g.49580221A>G	EXON3	ACCTACC	ACCCACC	T	C	NM_006009.3:c.247T>C	p.(Tyr83His)	0.00544524	0.0032462	0.00395303	0.00421483	725
chr12:g.49580221A>C	EXON3	ACCTACC	ACCGACC	T	G	NM_006009.3:c.247T>G	p.(Tyr83Asp)	0.000733013	0.000392686	0.000405775	0.000510491	4327
chr12:g.49580220T>G	EXON3	CCTACCG	CCTCCCG	A	C	NM_006009.3:c.248A>C	p.(Tyr83Ser)	0.00352603	0.00259813	0.00259813	0.00290743	1345
chr12:g.49580220T>C	EXON3	CCTACCG	CCTGCCG	A	G	NM_006009.3:c.248A>G	p.(Tyr83Cys)	0.00575299	0.00296929	0.00389719	0.00420649	728
chr12:g.49580220T>A	EXON3	CCTACCG	CCTTCCG	A	T	NM_006009.3:c.248A>T	p.(Tyr83Phe)	0.000927902	0.000556741	0.000835112	0.000773252	3633
chr12:g.49580219G>T	EXON3	CTACCGC	CTAACGC	C	A	NM_006009.3:c.249C>A	p.(Tyr83*)	0.00200864	0.00120518	0.00120518	0.001473	2261
chr12:g.49580219G>C	EXON3	CTACCGC	CTAGCGC	C	G	NM_006009.3:c.249C>G	p.(Tyr83*)	0.00160691	0.000803455	0.000803455	0.00107127	2876
chr12:g.49580219G>A	EXON3	CTACCGC	CTATCGC	C	T	NM_006009.3:c.249C>T	p.(=)	0.00622678	0.00341468	0.00401727	0.00455291	619
chr12:g.49580218G>T	EXON3	TACCGCC	TACAGCC	C	A	NM_006009.3:c.250C>A	p.(Arg84Ser)	0.00739256	0.00476131	0.0052625	0.00580545	309
chr12:g.49580218G>C	EXON3	TACCGCC	TACGGCC	C	G	NM_006009.3:c.250C>G	p.(Arg84Gly)	0.00388422	0.00250595	0.00313244	0.00317421	1196
chr12:g.49580218G>A	EXON3	TACCGCC	TACTGCC	C	T	NM_006009.3:c.250C>T	p.(Arg84Cys)	0.0956021	0.0524997	0.0603934	0.0694984	18
chr12:g.49580217C>T	EXON3	ACCGCCA	ACCACCA	G	A	NM_006009.3:c.251G>A	p.(Arg84His)	0.0923245	0.0539469	0.0630817	0.0697844	17
chr12:g.49580217C>G	EXON3	ACCGCCA	ACCCCCA	G	C	NM_006009.3:c.251G>C	p.(Arg84Pro)	0.00344709	0.00275767	0.00275767	0.00298748	1303
chr12:g.49580217C>A	EXON3	ACCGCCA	ACCTCCA	G	T	NM_006009.3:c.251G>T	p.(Arg84Leu)	0.00907733	0.00488337	0.00597495	0.00664522	190
chr12:g.49580216G>T	EXON3	CCGCCAG	CCGACAG	C	A	NM_006009.3:c.252C>A	p.(=)	0.000943566	0.000584112	0.00053918	0.000688953	3847
chr12:g.49580216G>C	EXON3	CCGCCAG	CCGGCAG	C	G	NM_006009.3:c.252C>G	p.(=)	0.000988497	0.00053918	0.000629044	0.000718907	3769
chr12:g.49580216G>A	EXON3	CCGCCAG	CCGTCAG	C	T	NM_006009.3:c.252C>T	p.(=)	0.00494249	0.00220165	0.0035496	0.00356458	990
chr12:g.49580215G>T	EXON3	CGCCAGC	CGCAAGC	C	A	NM_006009.3:c.253C>A	p.(Gln85Lys)	0.000732005	0.000284669	0.000447336	0.000488003	4364
chr12:g.49580215G>C	EXON3	CGCCAGC	CGCGAGC	C	G	NM_006009.3:c.253C>G	p.(Gln85Glu)	0.000732005	0.000610004	0.000610004	0.000650671	3971
chr12:g.49580215G>A	EXON3	CGCCAGC	CGCTAGC	C	T	NM_006009.3:c.253C>T	p.(Gln85*)	0.00361936	0.00207401	0.00235868	0.00268402	1451
chr12:g.49580214T>G	EXON3	GCCAGCT	GCCCGCT	A	C	NM_006009.3:c.254A>C	p.(Gln85Pro)	0.00113098	0.000525666	0.0006531	0.000769915	3643
chr12:g.49580214T>C	EXON3	GCCAGCT	GCCGGCT	A	G	NM_006009.3:c.254A>G	p.(Gln85Arg)	0.0044602	0.00290709	0.00328143	0.00354957	1001
chr12:g.49580214T>A	EXON3	GCCAGCT	GCCTGCT	A	T	NM_006009.3:c.254A>T	p.(Gln85Leu)	0.000812393	0.000501772	0.000533631	0.000615932	4075
chr12:g.49580213C>T	EXON3	CCAGCTC	CCAACTC	G	A	NM_006009.3:c.255G>A	p.(=)	0.00512303	0.0028285	0.00334662	0.00376605	894
chr12:g.49580213C>G	EXON3	CCAGCTC	CCACCTC	G	C	NM_006009.3:c.255G>C	p.(Gln85His)	0.00302412	0.00168653	0.00204604	0.00225223	1632
chr12:g.49580213C>A	EXON3	CCAGCTC	CCATCTC	G	T	NM_006009.3:c.255G>T	p.(Gln85His)	0.00209891	0.0010521	0.0012953	0.0014821	2251
chr12:g.49580212G>T	EXON3	CAGCTCT	CAGATCT	C	A	NM_006009.3:c.256C>A	p.(Leu86Ile)	0.00168971	0.00100481	0.00120307	0.0012992	2483
chr12:g.49580212G>C	EXON3	CAGCTCT	CAGGTCT	C	G	NM_006009.3:c.256C>G	p.(Leu86Val)	0.00200963	0.00110394	0.00125714	0.0014569	2282
chr12:g.49580212G>A	EXON3	CAGCTCT	CAGTTCT	C	T	NM_006009.3:c.256C>T	p.(Leu86Phe)	0.00637583	0.00333886	0.00403727	0.00458399	608
chr12:g.49580211A>T	EXON3	AGCTCTT	AGCACTT	T	A	NM_006009.3:c.257T>A	p.(Leu86His)	0.00111408	0.000675909	0.000773799	0.000854597	3392
chr12:g.49580211A>G	EXON3	AGCTCTT	AGCCCTT	T	C	NM_006009.3:c.257T>C	p.(Leu86Pro)	0.00292272	0.0016921	0.00213494	0.00224992	1635
chr12:g.49580211A>C	EXON3	AGCTCTT	AGCGCTT	T	G	NM_006009.3:c.257T>G	p.(Leu86Arg)	0.000853043	0.000531404	0.000531404	0.000638617	4009
chr12:g.49580210G>T	EXON3	GCTCTTC	GCTATTC	C	A	NM_006009.3:c.258C>A	p.(=)	0.00176427	0.000991958	0.00119035	0.00131553	2463
chr12:g.49580210G>C	EXON3	GCTCTTC	GCTGTTC	C	G	NM_006009.3:c.258C>G	p.(=)	0.0027704	0.00150919	0.00184221	0.0020406	1757
chr12:g.49580210G>A	EXON3	GCTCTTC	GCTTTTC	C	T	NM_006009.3:c.258C>T	p.(=)	0.00734758	0.00376236	0.00481808	0.00530934	414
chr12:g.49580209A>T	EXON3	CTCTTCC	CTCATCC	T	A	NM_006009.3:c.259T>A	p.(Phe87Ile)	0.000475523	0.000324388	0.000324388	0.000374766	4510
chr12:g.49580209A>G	EXON3	CTCTTCC	CTCCTCC	T	C	NM_006009.3:c.259T>C	p.(Phe87Leu)	0.00416912	0.00245503	0.00277573	0.00313329	1224
chr12:g.49580209A>C	EXON3	CTCTTCC	CTCGTCC	T	G	NM_006009.3:c.259T>G	p.(Phe87Val)	0.000796225	0.000379682	0.000453406	0.000543104	4261
chr12:g.49580208A>T	EXON3	TCTTCCA	TCTACCA	T	A	NM_006009.3:c.260T>A	p.(Phe87Tyr)	0.000542441	0.000220994	0.000294659	0.000352698	4519
chr12:g.49580208A>G	EXON3	TCTTCCA	TCTCCCA	T	C	NM_006009.3:c.260T>C	p.(Phe87Ser)	0.00268542	0.00159719	0.00182488	0.00203583	1760
chr12:g.49580208A>C	EXON3	TCTTCCA	TCTGCCA	T	G	NM_006009.3:c.260T>G	p.(Phe87Cys)	0.000857191	0.000542441	0.000626151	0.000675261	3898
chr12:g.49580207G>T	EXON3	CTTCCAC	CTTACAC	C	A	NM_006009.3:c.261C>A	p.(Phe87Leu)	0.00116944	0.000594384	0.000763517	0.000842446	3425
chr12:g.49580207G>C	EXON3	CTTCCAC	CTTGCAC	C	G	NM_006009.3:c.261C>G	p.(Phe87Leu)	0.00140623	0.000705529	0.000937483	0.00101641	2993
chr12:g.49580207G>A	EXON3	CTTCCAC	CTTTCAC	C	T	NM_006009.3:c.261C>T	p.(=)	0.00503052	0.00252251	0.00367745	0.00374349	902
chr12:g.49580206G>T	EXON3	TTCCACC	TTCAACC	C	A	NM_006009.3:c.262C>A	p.(His88Asn)	0.000941587	0.000534728	0.000610288	0.000695534	3829
chr12:g.49580206G>C	EXON3	TTCCACC	TTCGACC	C	G	NM_006009.3:c.262C>G	p.(His88Asp)	0.000441732	0.000226678	0.000331299	0.000333236	4528
chr12:g.49580206G>A	EXON3	TTCCACC	TTCTACC	C	T	NM_006009.3:c.262C>T	p.(His88Tyr)	0.00874164	0.00448125	0.00542865	0.00621718	236
chr12:g.49580205T>G	EXON3	TCCACCC	TCCCCCC	A	C	NM_006009.3:c.263A>C	p.(His88Pro)	0.00096731	0.000603979	0.000670039	0.000747109	3691
chr12:g.49580205T>C	EXON3	TCCACCC	TCCGCCC	A	G	NM_006009.3:c.263A>G	p.(His88Arg)	0.00630875	0.00448737	0.00489317	0.00522976	437
chr12:g.49580205T>A	EXON3	TCCACCC	TCCTCCC	A	T	NM_006009.3:c.263A>T	p.(His88Leu)	0.0010664	0.000660602	0.000750255	0.000825752	3479
chr12:g.49580204G>T	EXON3	CCACCCT	CCAACCT	C	A	NM_006009.3:c.264C>A	p.(His88Gln)	0.00343523	0.0018535	0.00218507	0.00249127	1521
chr12:g.49580204G>C	EXON3	CCACCCT	CCAGCCT	C	G	NM_006009.3:c.264C>G	p.(His88Gln)	0.00226116	0.00146215	0.00157629	0.00176653	1954
chr12:g.49580204G>A	EXON3	CCACCCT	CCATCCT	C	T	NM_006009.3:c.264C>T	p.(=)	0.00877288	0.00451689	0.00618015	0.00648998	200
chr12:g.49580203G>T	EXON3	CACCCTG	CACACTG	C	A	NM_006009.3:c.265C>A	p.(Pro89Thr)	0.00322824	0.00169558	0.00202142	0.00231508	1595
chr12:g.49580203G>C	EXON3	CACCCTG	CACGCTG	C	G	NM_006009.3:c.265C>G	p.(Pro89Ala)	0.00307135	0.00172575	0.00209383	0.00229698	1609
chr12:g.49580203G>A	EXON3	CACCCTG	CACTCTG	C	T	NM_006009.3:c.265C>T	p.(Pro89Ser)	0.00787449	0.00400664	0.00517725	0.00568613	332
chr12:g.49580202G>T	EXON3	ACCCTGA	ACCATGA	C	A	NM_006009.3:c.266C>A	p.(Pro89His)	0.00132094	0.000702627	0.000892336	0.000971967	3069
chr12:g.49580202G>C	EXON3	ACCCTGA	ACCGTGA	C	G	NM_006009.3:c.266C>G	p.(Pro89Arg)	0.00262782	0.00127176	0.00137012	0.00175657	1963
chr12:g.49580202G>A	EXON3	ACCCTGA	ACCTTGA	C	T	NM_006009.3:c.266C>T	p.(Pro89Leu)	0.00486218	0.00252243	0.00310561	0.00349674	1029
chr12:g.49580201A>T	EXON3	CCCTGAG	CCCAGAG	T	A	NM_006009.3:c.267T>A	p.(=)	0.000839832	0.000468997	0.000654415	0.000654415	3958
chr12:g.49580201A>G	EXON3	CCCTGAG	CCCCGAG	T	C	NM_006009.3:c.267T>C	p.(=)	0.00580793	0.003632	0.0039483	0.00446274	647
chr12:g.49580201A>C	EXON3	CCCTGAG	CCCGGAG	T	G	NM_006009.3:c.267T>G	p.(=)	0.00115068	0.000588973	0.000670775	0.000803476	3539
chr12:g.49580200C>T	EXON3	CCTGAGC	CCTAAGC	G	A	NM_006009.3:c.268G>A	p.(Glu90Lys)	0.00543683	0.00278301	0.00350972	0.00390985	830
chr12:g.49580200C>G	EXON3	CCTGAGC	CCTCAGC	G	C	NM_006009.3:c.268G>C	p.(Glu90Gln)	0.00234161	0.00138881	0.00158799	0.0017728	1947
chr12:g.49580200C>A	EXON3	CCTGAGC	CCTTAGC	G	T	NM_006009.3:c.268G>T	p.(Glu90*)	0.000796684	0.000425257	0.000495236	0.000572392	4193
chr12:g.49580199T>G	EXON3	CTGAGCA	CTGCGCA	A	C	NM_006009.3:c.269A>C	p.(Glu90Ala)	0.000801429	0.000393058	0.000423686	0.000539391	4269
chr12:g.49580199T>C	EXON3	CTGAGCA	CTGGGCA	A	G	NM_006009.3:c.269A>G	p.(Glu90Gly)	0.00330781	0.00206228	0.00242471	0.00259826	1477
chr12:g.49580199T>A	EXON3	CTGAGCA	CTGTGCA	A	T	NM_006009.3:c.269A>T	p.(Glu90Val)	0.000638081	0.000326697	0.000418581	0.00046112	4404
chr12:g.49580198C>T	EXON3	TGAGCAA	TGAACAA	G	A	NM_006009.3:c.270G>A	p.(=)	0.00863454	0.00470238	0.00559421	0.00631037	223
chr12:g.49580198C>G	EXON3	TGAGCAA	TGACCAA	G	C	NM_006009.3:c.270G>C	p.(Glu90Asp)	0.00127694	0.000699276	0.00080062	0.000925612	3177
chr12:g.49580198C>A	EXON3	TGAGCAA	TGATCAA	G	T	NM_006009.3:c.270G>T	p.(Glu90Asp)	0.00114012	0.000663805	0.000633402	0.000812444	3521
chr12:g.49580197G>T	EXON3	GAGCAAC	GAGAAAC	C	A	NM_006009.3:c.271C>A	p.(Gln91Lys)	0.00465617	0.00226281	0.00260006	0.00317301	1197
chr12:g.49580197G>C	EXON3	GAGCAAC	GAGGAAC	C	G	NM_006009.3:c.271C>G	p.(Gln91Glu)	0.00181678	0.000946465	0.00109877	0.00128734	2501
chr12:g.49580197G>A	EXON3	GAGCAAC	GAGTAAC	C	T	NM_006009.3:c.271C>T	p.(Gln91*)	0.00416662	0.00206699	0.00246951	0.00290104	1351
chr12:g.49580196T>G	EXON3	AGCAACT	AGCCACT	A	C	NM_006009.3:c.272A>C	p.(Gln91Pro)	0.00121869	0.000698278	0.000797091	0.000904687	3242
chr12:g.49580196T>C	EXON3	AGCAACT	AGCGACT	A	G	NM_006009.3:c.272A>G	p.(Gln91Arg)	0.00223976	0.00148219	0.00161394	0.00177863	1945
chr12:g.49580196T>A	EXON3	AGCAACT	AGCTACT	A	T	NM_006009.3:c.272A>T	p.(Gln91Leu)	0.000988129	0.000606053	0.000645578	0.000746587	3697
chr12:g.49580195T>G	EXON3	GCAACTT	GCACCTT	A	C	NM_006009.3:c.273A>C	p.(Gln91His)	0.00170971	0.00105876	0.00111366	0.00129405	2496
chr12:g.49580195T>C	EXON3	GCAACTT	GCAGCTT	A	G	NM_006009.3:c.273A>G	p.(=)	0.00565459	0.00313708	0.00352922	0.00410696	757
chr12:g.49580195T>A	EXON3	GCAACTT	GCATCTT	A	T	NM_006009.3:c.273A>T	p.(Gln91His)	0.00149796	0.000917597	0.00109014	0.00116856	2693
chr12:g.49580194G>T	EXON3	CAACTTA	CAAATTA	C	A	NM_006009.3:c.274C>A	p.(Leu92Ile)	0.00201391	0.00111457	0.00125293	0.00146047	2277
chr12:g.49580194G>C	EXON3	CAACTTA	CAAGTTA	C	G	NM_006009.3:c.274C>G	p.(Leu92Val)	0.00242899	0.00119144	0.00154503	0.00172182	1995
chr12:g.49580194G>A	EXON3	CAACTTA	CAATTTA	C	T	NM_006009.3:c.274C>T	p.(Leu92Phe)	0.00822476	0.00435067	0.00501941	0.00586494	297
chr12:g.49580193A>T	EXON3	AACTTAT	AACATAT	T	A	NM_006009.3:c.275T>A	p.(Leu92His)	0.00178704	0.00110099	0.00133336	0.00140713	2353
chr12:g.49580193A>G	EXON3	AACTTAT	AACCTAT	T	C	NM_006009.3:c.275T>C	p.(Leu92Pro)	0.00251734	0.00153807	0.00170958	0.00192167	1841
chr12:g.49580193A>C	EXON3	AACTTAT	AACGTAT	T	G	NM_006009.3:c.275T>G	p.(Leu92Arg)	0.00245649	0.00123931	0.00160999	0.0017686	1950
chr12:g.49580192A>T	EXON3	ACTTATC	ACTAATC	T	A	NM_006009.3:c.276T>A	p.(=)	0.000769207	0.000399988	0.00047178	0.000546992	4251
chr12:g.49580192A>G	EXON3	ACTTATC	ACTCATC	T	C	NM_006009.3:c.276T>C	p.(=)	0.00403065	0.00248197	0.00269735	0.00306999	1250
chr12:g.49580192A>C	EXON3	ACTTATC	ACTGATC	T	G	NM_006009.3:c.276T>G	p.(=)	0.000830744	0.000512805	0.000523061	0.000622203	4057
chr12:g.49580191T>G	EXON3	CTTATCA	CTTCTCA	A	C	NM_006009.3:c.277A>C	p.(Ile93Leu)	0.00125819	0.000848064	0.000973189	0.00102648	2974
chr12:g.49580191T>C	EXON3	CTTATCA	CTTGTCA	A	G	NM_006009.3:c.277A>G	p.(Ile93Val)	0.00508143	0.00273883	0.0030725	0.00363092	955
chr12:g.49580191T>A	EXON3	CTTATCA	CTTTTCA	A	T	NM_006009.3:c.277A>T	p.(Ile93Phe)	0.0017865	0.00103575	0.000987091	0.00126978	2522
chr12:g.49580190A>T	EXON3	TTATCAC	TTAACAC	T	A	NM_006009.3:c.278T>A	p.(Ile93Asn)	0.00160643	0.00103864	0.000962471	0.00120251	2636
chr12:g.49580190A>G	EXON3	TTATCAC	TTACCAC	T	C	NM_006009.3:c.278T>C	p.(Ile93Thr)	0.00580252	0.00315746	0.00369062	0.00421687	724
chr12:g.49580190A>C	EXON3	TTATCAC	TTAGCAC	T	G	NM_006009.3:c.278T>G	p.(Ile93Ser)	0.000609334	0.000457	0.000470849	0.000512394	4323
chr12:g.49580189G>T	EXON3	TATCACA	TATAACA	C	A	NM_006009.3:c.279C>A	p.(=)	0.00124331	0.000589459	0.000698435	0.000843736	3423
chr12:g.49580189G>C	EXON3	TATCACA	TATGACA	C	G	NM_006009.3:c.279C>G	p.(Ile93Met)	0.00131761	0.000693481	0.000812364	0.000941153	3140
chr12:g.49580189G>A	EXON3	TATCACA	TATTACA	C	T	NM_006009.3:c.279C>T	p.(=)	0.00438379	0.00242718	0.00293739	0.00324946	1159
chr12:g.49580188T>G	EXON3	ATCACAG	ATCCCAG	A	C	NM_006009.3:c.280A>C	p.(Thr94Pro)	0.0013083	0.000804397	0.000966201	0.0010263	2975
chr12:g.49580188T>C	EXON3	ATCACAG	ATCGCAG	A	G	NM_006009.3:c.280A>G	p.(Thr94Ala)	0.00411445	0.00243631	0.00268595	0.0030789	1243
chr12:g.49580188T>A	EXON3	ATCACAG	ATCTCAG	A	T	NM_006009.3:c.280A>T	p.(Thr94Ser)	0.000707315	0.000397576	0.000499281	0.000534724	4282
chr12:g.49580187G>T	EXON3	TCACAGG	TCAAAGG	C	A	NM_006009.3:c.281C>A	p.(Thr94Lys)	0.00137298	0.000665205	0.000851462	0.000963217	3087
chr12:g.49580187G>C	EXON3	TCACAGG	TCAGAGG	C	G	NM_006009.3:c.281C>G	p.(Thr94Arg)	0.00204883	0.00111222	0.00135702	0.00150602	2221
chr12:g.49580187G>A	EXON3	TCACAGG	TCATAGG	C	T	NM_006009.3:c.281C>T	p.(Thr94Ile)	0.00763123	0.00432117	0.00484801	0.00560014	354
chr12:g.49580186T>G	EXON3	CACAGGC	CACCGGC	A	C	NM_006009.3:c.282A>C	p.(=)	0.00106393	0.000616265	0.000732541	0.000804245	3533
chr12:g.49580186T>C	EXON3	CACAGGC	CACGGGC	A	G	NM_006009.3:c.282A>G	p.(=)	0.00408711	0.00229646	0.00274412	0.00304256	1273
chr12:g.49580186T>A	EXON3	CACAGGC	CACTGGC	A	T	NM_006009.3:c.282A>T	p.(=)	0.000930211	0.000540685	0.000598823	0.000689906	3843
chr12:g.49580185C>T	EXON3	ACAGGCA	ACAAGCA	G	A	NM_006009.3:c.283G>A	p.(Gly95Ser)	0.00577683	0.00276714	0.00339568	0.00397989	807
chr12:g.49580185C>G	EXON3	ACAGGCA	ACACGCA	G	C	NM_006009.3:c.283G>C	p.(Gly95Arg)	0.00127012	0.000631148	0.000771983	0.000891084	3299
chr12:g.49580185C>A	EXON3	ACAGGCA	ACATGCA	G	T	NM_006009.3:c.283G>T	p.(Gly95Cys)	0.00110321	0.000662445	0.000735471	0.000833707	3451
chr12:g.49580184C>T	EXON3	CAGGCAA	CAGACAA	G	A	NM_006009.3:c.284G>A	p.(Gly95Asp)	0.00925511	0.00461761	0.00572225	0.00653165	197
chr12:g.49580184C>G	EXON3	CAGGCAA	CAGCCAA	G	C	NM_006009.3:c.284G>C	p.(Gly95Ala)	0.00137334	0.000771259	0.000845897	0.000996832	3022
chr12:g.49580184C>A	EXON3	CAGGCAA	CAGTCAA	G	T	NM_006009.3:c.284G>T	p.(Gly95Val)	0.00209484	0.00102503	0.00126885	0.00146291	2276
chr12:g.49580183G>T	EXON3	AGGCAAA	AGGAAAA	C	A	NM_006009.3:c.285C>A	p.(=)	0.00359832	0.00170563	0.00212011	0.00247469	1528
chr12:g.49580183G>C	EXON3	AGGCAAA	AGGGAAA	C	G	NM_006009.3:c.285C>G	p.(=)	0.00185968	0.0010087	0.00111874	0.00132904	2438
chr12:g.49580183G>A	EXON3	AGGCAAA	AGGTAAA	C	T	NM_006009.3:c.285C>T	p.(=)	0.00469139	0.00266298	0.0030041	0.00345283	1052
chr12:g.49580182T>G	EXON3	GGCAAAG	GGCCAAG	A	C	NM_006009.3:c.286A>C	p.(Lys96Gln)	0.00104867	0.000571058	0.000633355	0.000751028	3681
chr12:g.49580182T>C	EXON3	GGCAAAG	GGCGAAG	A	G	NM_006009.3:c.286A>G	p.(Lys96Glu)	0.00401817	0.0024867	0.00281376	0.00310621	1230
chr12:g.49580182T>A	EXON3	GGCAAAG	GGCTAAG	A	T	NM_006009.3:c.286A>T	p.(Lys96*)	0.000404932	0.000249189	0.000306295	0.000320139	4532
chr12:g.49580181T>G	EXON3	GCAAAGA	GCACAGA	A	C	NM_006009.3:c.287A>C	p.(Lys96Thr)	0.000655378	0.000379014	0.000438235	0.000490876	4360
chr12:g.49580181T>C	EXON3	GCAAAGA	GCAGAGA	A	G	NM_006009.3:c.287A>G	p.(Lys96Arg)	0.00291367	0.00170556	0.0019385	0.00218591	1670
chr12:g.49580181T>A	EXON3	GCAAAGA	GCATAGA	A	T	NM_006009.3:c.287A>T	p.(Lys96Ile)	0.000379014	0.000268468	0.00026452	0.000304001	4540
chr12:g.49580180T>G	EXON3	CAAAGAA	CAACGAA	A	C	NM_006009.3:c.288A>C	p.(Lys96Asn)	0.00078416	0.000420086	0.000499435	0.000567894	4206
chr12:g.49580180T>C	EXON3	CAAAGAA	CAAGGAA	A	G	NM_006009.3:c.288A>G	p.(=)	0.00298261	0.00163833	0.00183671	0.00215255	1694
chr12:g.49580180T>A	EXON3	CAAAGAA	CAATGAA	A	T	NM_006009.3:c.288A>T	p.(Lys96Asn)	0.000700143	0.00044109	0.00047143	0.000537554	4275
chr12:g.49580179C>T	EXON3	AAAGAAG	AAAAAAG	G	A	NM_006009.3:c.289G>A	p.(Glu97Lys)	0.00398438	0.00224034	0.00288414	0.00303629	1278
chr12:g.49580179C>G	EXON3	AAAGAAG	AAACAAG	G	C	NM_006009.3:c.289G>C	p.(Glu97Gln)	0.0019314	0.00105838	0.00121186	0.00140055	2365
chr12:g.49580179C>A	EXON3	AAAGAAG	AAATAAG	G	T	NM_006009.3:c.289G>T	p.(Glu97*)	0.00325687	0.0018417	0.00204302	0.00238053	1567
chr12:g.49580178T>G	EXON3	AAGAAGA	AAGCAGA	A	C	NM_006009.3:c.290A>C	p.(Glu97Ala)	0.000931537	0.000548829	0.000626632	0.000702333	3817
chr12:g.49580178T>C	EXON3	AAGAAGA	AAGGAGA	A	G	NM_006009.3:c.290A>G	p.(Glu97Gly)	0.00326143	0.00200606	0.00232148	0.00252966	1510
chr12:g.49580178T>A	EXON3	AAGAAGA	AAGTAGA	A	T	NM_006009.3:c.290A>T	p.(Glu97Val)	0.000550932	0.000325933	0.000397428	0.000424764	4456
chr12:g.49580177T>G	EXON3	AGAAGAT	AGACGAT	A	C	NM_006009.3:c.291A>C	p.(Glu97Asp)	0.00147355	0.000670884	0.000806658	0.000983697	3047
chr12:g.49580177T>C	EXON3	AGAAGAT	AGAGGAT	A	G	NM_006009.3:c.291A>G	p.(=)	0.00286723	0.00158935	0.00181298	0.00208986	1724
chr12:g.49580177T>A	EXON3	AGAAGAT	AGATGAT	A	T	NM_006009.3:c.291A>T	p.(Glu97Asp)	0.00128187	0.000726791	0.000770718	0.000926459	3176
chr12:g.49580176C>T	EXON3	GAAGATG	GAAAATG	G	A	NM_006009.3:c.292G>A	p.(Asp98Asn)	0.00461012	0.00255733	0.00301735	0.00339493	1090
chr12:g.49580176C>G	EXON3	GAAGATG	GAACATG	G	C	NM_006009.3:c.292G>C	p.(Asp98His)	0.00142953	0.000791437	0.000915099	0.00104536	2936
chr12:g.49580176C>A	EXON3	GAAGATG	GAATATG	G	T	NM_006009.3:c.292G>T	p.(Asp98Tyr)	0.00236442	0.00118716	0.00137017	0.00164058	2077
chr12:g.49580175T>G	EXON3	AAGATGC	AAGCTGC	A	C	NM_006009.3:c.293A>C	p.(Asp98Ala)	0.000808402	0.000432077	0.000557518	0.000599332	4129
chr12:g.49580175T>C	EXON3	AAGATGC	AAGGTGC	A	G	NM_006009.3:c.293A>G	p.(Asp98Gly)	0.00473194	0.00271093	0.00309423	0.00351237	1017
chr12:g.49580175T>A	EXON3	AAGATGC	AAGTTGC	A	T	NM_006009.3:c.293A>T	p.(Asp98Val)	0.00317785	0.00184678	0.00193738	0.00232067	1593
chr12:g.49580174A>T	EXON3	AGATGCT	AGAAGCT	T	A	NM_006009.3:c.294T>A	p.(Asp98Glu)	0.00211243	0.00106945	0.00131299	0.00149829	2230
chr12:g.49580174A>G	EXON3	AGATGCT	AGACGCT	T	C	NM_006009.3:c.294T>C	p.(=)	0.00829618	0.00473311	0.00554314	0.00619081	241
chr12:g.49580174A>C	EXON3	AGATGCT	AGAGGCT	T	G	NM_006009.3:c.294T>G	p.(Asp98Glu)	0.00154594	0.000825912	0.000963565	0.00111181	2807
chr12:g.49580173C>T	EXON3	GATGCTG	GATACTG	G	A	NM_006009.3:c.295G>A	p.(Ala99Thr)	0.00500356	0.00264762	0.0031132	0.00358813	977
chr12:g.49580173C>G	EXON3	GATGCTG	GATCCTG	G	C	NM_006009.3:c.295G>C	p.(Ala99Pro)	0.00100408	0.000639469	0.000622641	0.000755396	3666
chr12:g.49580173C>A	EXON3	GATGCTG	GATTCTG	G	T	NM_006009.3:c.295G>T	p.(Ala99Ser)	0.00217083	0.00104895	0.00137991	0.00153323	2197
chr12:g.49580172G>T	EXON3	ATGCTGC	ATGATGC	C	A	NM_006009.3:c.296C>A	p.(Ala99Asp)	0.00163181	0.000899425	0.000976519	0.00116925	2691
chr12:g.49580172G>C	EXON3	ATGCTGC	ATGGTGC	C	G	NM_006009.3:c.296C>G	p.(Ala99Gly)	0.00149048	0.000790209	0.000950821	0.00107717	2857
chr12:g.49580172G>A	EXON3	ATGCTGC	ATGTTGC	C	T	NM_006009.3:c.296C>T	p.(Ala99Val)	0.00785712	0.00438149	0.00521666	0.00581842	305
chr12:g.49580171A>T	EXON3	TGCTGCC	TGCAGCC	T	A	NM_006009.3:c.297T>A	p.(=)	0.000810148	0.000458895	0.000515549	0.000594864	4146
chr12:g.49580171A>G	EXON3	TGCTGCC	TGCCGCC	T	C	NM_006009.3:c.297T>C	p.(=)	0.0040734	0.00275337	0.00296299	0.00326325	1148
chr12:g.49580171A>C	EXON3	TGCTGCC	TGCGGCC	T	G	NM_006009.3:c.297T>G	p.(=)	0.000895128	0.000498552	0.000521214	0.000638298	4010
chr12:g.49580170C>T	EXON3	GCTGCCA	GCTACCA	G	A	NM_006009.3:c.298G>A	p.(Ala100Thr)	0.00491761	0.0025584	0.00318089	0.0035523	996
chr12:g.49580170C>G	EXON3	GCTGCCA	GCTCCCA	G	C	NM_006009.3:c.298G>C	p.(Ala100Pro)	0.0010769	0.000684731	0.000759429	0.000840352	3434
chr12:g.49580170C>A	EXON3	GCTGCCA	GCTTCCA	G	T	NM_006009.3:c.298G>T	p.(Ala100Ser)	0.00347968	0.00176163	0.00219114	0.00247748	1525
chr12:g.49580169G>T	EXON3	CTGCCAA	CTGACAA	C	A	NM_006009.3:c.299C>A	p.(Ala100Asp)	0.00319978	0.00160619	0.00184554	0.00221717	1654
chr12:g.49580169G>C	EXON3	CTGCCAA	CTGGCAA	C	G	NM_006009.3:c.299C>G	p.(Ala100Gly)	0.00107079	0.000541695	0.000598384	0.000736957	3720
chr12:g.49580169G>A	EXON3	CTGCCAA	CTGTCAA	C	T	NM_006009.3:c.299C>T	p.(Ala100Val)	0.00627988	0.00318718	0.0041005	0.00452252	625
chr12:g.49580168G>T	EXON3	TGCCAAT	TGCAAAT	C	A	NM_006009.3:c.300C>A	p.(=)	0.00159188	0.000947727	0.00116985	0.00123649	2583
chr12:g.49580168G>C	EXON3	TGCCAAT	TGCGAAT	C	G	NM_006009.3:c.300C>G	p.(=)	0.000651562	0.000340589	0.000562713	0.000518288	4308
chr12:g.49580168G>A	EXON3	TGCCAAT	TGCTAAT	C	T	NM_006009.3:c.300C>T	p.(=)	0.00436103	0.00222123	0.00254702	0.00304309	1270
chr12:g.49580167T>G	EXON3	GCCAATA	GCCCATA	A	C	NM_006009.3:c.301A>C	p.(Asn101His)	0.00110434	0.000536163	0.000584178	0.000741559	3709
chr12:g.49580167T>C	EXON3	GCCAATA	GCCGATA	A	G	NM_006009.3:c.301A>G	p.(Asn101Asp)	0.00357709	0.00199261	0.0026408	0.00273683	1424
chr12:g.49580167T>A	EXON3	GCCAATA	GCCTATA	A	T	NM_006009.3:c.301A>T	p.(Asn101Tyr)	0.000736224	0.000376114	0.000496151	0.000536163	4277
chr12:g.49580166T>G	EXON3	CCAATAA	CCACTAA	A	C	NM_006009.3:c.302A>C	p.(Asn101Thr)	0.000832433	0.000410592	0.000551206	0.000598077	4134
chr12:g.49580166T>C	EXON3	CCAATAA	CCAGTAA	A	G	NM_006009.3:c.302A>G	p.(Asn101Ser)	0.0169411	0.00897678	0.00996108	0.0119597	82
chr12:g.49580166T>A	EXON3	CCAATAA	CCATTAA	A	T	NM_006009.3:c.302A>T	p.(Asn101Ile)	0.000928051	0.000545581	0.000562455	0.000678696	3885
chr12:g.49580165A>T	EXON3	CAATAAC	CAAAAAC	T	A	NM_006009.3:c.303T>A	p.(Asn101Lys)	0.00192591	0.00110346	0.00126795	0.00143244	2315
chr12:g.49580165A>G	EXON3	CAATAAC	CAACAAC	T	C	NM_006009.3:c.303T>C	p.(=)	0.00573661	0.00334464	0.00351599	0.00419908	729
chr12:g.49580165A>C	EXON3	CAATAAC	CAAGAAC	T	G	NM_006009.3:c.303T>G	p.(Asn101Lys)	0.000822453	0.000500326	0.000548302	0.000623694	4046
chr12:g.49580164T>G	EXON3	AATAACT	AATCACT	A	C	NM_006009.3:c.304A>C	p.(Asn102His)	0.000804888	0.000535344	0.000598986	0.000646406	3981
chr12:g.49580164T>C	EXON3	AATAACT	AATGACT	A	G	NM_006009.3:c.304A>G	p.(Asn102Asp)	0.00234353	0.00136644	0.00158357	0.00176451	1957
chr12:g.49580164T>A	EXON3	AATAACT	AATTACT	A	T	NM_006009.3:c.304A>T	p.(Asn102Tyr)	0.000726271	0.000438009	0.000456727	0.000540336	4267
chr12:g.49580163T>G	EXON3	ATAACTA	ATACCTA	A	C	NM_006009.3:c.305A>C	p.(Asn102Thr)	0.00133315	0.000860638	0.000900014	0.00103127	2966
chr12:g.49580163T>C	EXON3	ATAACTA	ATAGCTA	A	G	NM_006009.3:c.305A>G	p.(Asn102Ser)	0.00419069	0.00221629	0.00256504	0.00299067	1302
chr12:g.49580163T>A	EXON3	ATAACTA	ATATCTA	A	T	NM_006009.3:c.305A>T	p.(Asn102Ile)	0.0016144	0.00107439	0.00123189	0.0013069	2471
chr12:g.49580162G>T	EXON3	TAACTAT	TAAATAT	C	A	NM_006009.3:c.306C>A	p.(Asn102Lys)	0.00227956	0.00135674	0.00157064	0.00173564	1981
chr12:g.49580162G>C	EXON3	TAACTAT	TAAGTAT	C	G	NM_006009.3:c.306C>G	p.(Asn102Lys)	0.00275014	0.00154008	0.00188843	0.00205955	1744
chr12:g.49580162G>A	EXON3	TAACTAT	TAATTAT	C	T	NM_006009.3:c.306C>T	p.(=)	0.00592808	0.00337351	0.00378908	0.00436356	679
chr12:g.49580161A>T	EXON3	AACTATG	AACAATG	T	A	NM_006009.3:c.307T>A	p.(Tyr103Asn)	0.00113692	0.000724108	0.00077148	0.000877502	3341
chr12:g.49580161A>G	EXON3	AACTATG	AACCATG	T	C	NM_006009.3:c.307T>C	p.(Tyr103His)	0.00445969	0.00252423	0.00286936	0.00328443	1140
chr12:g.49580161A>C	EXON3	AACTATG	AACGATG	T	G	NM_006009.3:c.307T>G	p.(Tyr103Asp)	0.00118429	0.000676737	0.000778247	0.000879758	3333
chr12:g.49580160T>G	EXON3	ACTATGC	ACTCTGC	A	C	NM_006009.3:c.308A>C	p.(Tyr103Ser)	0.00206926	0.000946199	0.00122918	0.00141488	2344
chr12:g.49580160T>C	EXON3	ACTATGC	ACTGTGC	A	G	NM_006009.3:c.308A>G	p.(Tyr103Cys)	0.0113721	0.00638463	0.0073043	0.00835367	117
chr12:g.49580160T>A	EXON3	ACTATGC	ACTTTGC	A	T	NM_006009.3:c.308A>T	p.(Tyr103Phe)	0.000778183	0.000459835	0.000610166	0.000616061	4074
chr12:g.49580159A>T	EXON3	CTATGCC	CTAAGCC	T	A	NM_006009.3:c.309T>A	p.(Tyr103*)	0.00151703	0.000891689	0.00110013	0.00116962	2689
chr12:g.49580159A>G	EXON3	CTATGCC	CTACGCC	T	C	NM_006009.3:c.309T>C	p.(=)	0.00939168	0.00550068	0.00632288	0.00707175	162
chr12:g.49580159A>C	EXON3	CTATGCC	CTAGGCC	T	G	NM_006009.3:c.309T>G	p.(Tyr103*)	0.001297	0.000729564	0.000949591	0.000992052	3031
chr12:g.49580158C>T	EXON3	TATGCCC	TATACCC	G	A	NM_006009.3:c.310G>A	p.(Ala104Thr)	0.00646932	0.00392735	0.00392735	0.00477467	559
chr12:g.49580158C>G	EXON3	TATGCCC	TATCCCC	G	C	NM_006009.3:c.310G>C	p.(Ala104Pro)	0.000800722	0.000635494	0.000686333	0.000707516	3796
chr12:g.49580158C>A	EXON3	TATGCCC	TATTCCC	G	T	NM_006009.3:c.310G>T	p.(Ala104Ser)	0.00246571	0.00119473	0.00139809	0.00168618	2032
chr12:g.49580157G>T	EXON3	ATGCCCG	ATGACCG	C	A	NM_006009.3:c.311C>A	p.(Ala104Asp)	0.00273503	0.00186479	0.00198911	0.00219631	1661
chr12:g.49580157G>C	EXON3	ATGCCCG	ATGGCCG	C	G	NM_006009.3:c.311C>G	p.(Ala104Gly)	0.00159129	0.000895099	0.0011686	0.00121833	2610
chr12:g.49580157G>A	EXON3	ATGCCCG	ATGTCCG	C	T	NM_006009.3:c.311C>T	p.(Ala104Val)	0.00753375	0.00380417	0.004749	0.00536231	404
chr12:g.49580156G>T	EXON3	TGCCCGA	TGCACGA	C	A	NM_006009.3:c.312C>A	p.(=)	0.00149528	0.000805153	0.0010352	0.00111188	2806
chr12:g.49580156G>C	EXON3	TGCCCGA	TGCGCGA	C	G	NM_006009.3:c.312C>G	p.(=)	0.00143777	0.00120773	0.000920175	0.00118856	2651
chr12:g.49580156G>A	EXON3	TGCCCGA	TGCTCGA	C	T	NM_006009.3:c.312C>T	p.(=)	0.0058086	0.00339315	0.00356568	0.00425581	712
chr12:g.49580155G>T	EXON3	GCCCGAG	GCCAGAG	C	A	NM_006009.3:c.313C>A	p.(=)	0.0048792	0.00279488	0.002937	0.00353703	1008
chr12:g.49580155G>C	EXON3	GCCCGAG	GCCGGAG	C	G	NM_006009.3:c.313C>G	p.(Arg105Gly)	0.00900047	0.00450024	0.00573188	0.00641086	216
chr12:g.49580155G>A	EXON3	GCCCGAG	GCCTGAG	C	T	NM_006009.3:c.313C>T	p.(Arg105*)	0.0760303	0.0398863	0.0490763	0.0549976	50
chr12:g.49580154C>T	EXON3	CCCGAGG	CCCAAGG	G	A	NM_006009.3:c.314G>A	p.(Arg105Gln)	0.0673721	0.034731	0.0432893	0.0484641	59
chr12:g.49580154C>G	EXON3	CCCGAGG	CCCCAGG	G	C	NM_006009.3:c.314G>C	p.(Arg105Pro)	0.00480992	0.0031845	0.00321767	0.00373737	909
chr12:g.49580154C>A	EXON3	CCCGAGG	CCCTAGG	G	T	NM_006009.3:c.314G>T	p.(Arg105Leu)	0.0029523	0.0018908	0.00192397	0.00225569	1629
chr12:g.49580153T>G	EXON3	CCGAGGG	CCGCGGG	A	C	NM_006009.3:c.315A>C	p.(=)	0.00136167	0.000825253	0.000990303	0.00105907	2896
chr12:g.49580153T>C	EXON3	CCGAGGG	CCGGGGG	A	G	NM_006009.3:c.315A>G	p.(=)	0.00255828	0.00160924	0.00185682	0.00200811	1779
chr12:g.49580153T>A	EXON3	CCGAGGG	CCGTGGG	A	T	NM_006009.3:c.315A>T	p.(=)	0.000866515	0.000660202	0.000495152	0.000673956	3900
chr12:g.49580152C>T	EXON3	CGAGGGC	CGAAGGC	G	A	NM_006009.3:c.316G>A	p.(Gly106Arg)	0.00665113	0.00330129	0.0044179	0.00479011	548
chr12:g.49580152C>G	EXON3	CGAGGGC	CGACGGC	G	C	NM_006009.3:c.316G>C	p.(Gly106Arg)	0.00305855	0.00126226	0.00145645	0.00192575	1838
chr12:g.49580152C>A	EXON3	CGAGGGC	CGATGGC	G	T	NM_006009.3:c.316G>T	p.(Gly106Trp)	0.000970968	0.000388387	0.000679678	0.000679678	3882
chr12:g.49580151C>T	EXON3	GAGGGCA	GAGAGCA	G	A	NM_006009.3:c.317G>A	p.(Gly106Glu)	0.00721806	0.00378838	0.00475121	0.00525255	433
chr12:g.49580151C>G	EXON3	GAGGGCA	GAGCGCA	G	C	NM_006009.3:c.317G>C	p.(Gly106Ala)	0.000956534	0.0003587	0.000453095	0.000589443	4155
chr12:g.49580151C>A	EXON3	GAGGGCA	GAGTGCA	G	T	NM_006009.3:c.317G>T	p.(Gly106Val)	0.0023347	0.00145368	0.00181238	0.00186692	1882
chr12:g.49580150C>T	EXON3	AGGGCAC	AGGACAC	G	A	NM_006009.3:c.318G>A	p.(=)	0.0101463	0.00505365	0.00642661	0.00720884	151
chr12:g.49580150C>G	EXON3	AGGGCAC	AGGCCAC	G	C	NM_006009.3:c.318G>C	p.(=)	0.00121716	0.000593975	0.000662136	0.000824424	3485
chr12:g.49580150C>A	EXON3	AGGGCAC	AGGTCAC	G	T	NM_006009.3:c.318G>T	p.(=)	0.00281408	0.00131453	0.00148981	0.0018728	1877
chr12:g.49580149G>T	EXON3	GGGCACT	GGGAACT	C	A	NM_006009.3:c.319C>A	p.(His107Asn)	0.00219721	0.00136787	0.00148635	0.00168381	2037
chr12:g.49580149G>C	EXON3	GGGCACT	GGGGACT	C	G	NM_006009.3:c.319C>G	p.(His107Asp)	0.00119554	0.000646238	0.000721633	0.000854471	3393
chr12:g.49580149G>A	EXON3	GGGCACT	GGGTACT	C	T	NM_006009.3:c.319C>T	p.(His107Tyr)	0.00584846	0.00314503	0.00390974	0.00430108	697
chr12:g.49580148T>G	EXON3	GGCACTA	GGCCCTA	A	C	NM_006009.3:c.320A>C	p.(His107Pro)	0.00124941	0.000986375	0.00086801	0.0010346	2959
chr12:g.49580148T>C	EXON3	GGCACTA	GGCGCTA	A	G	NM_006009.3:c.320A>G	p.(His107Arg)	0.00506339	0.00314325	0.00341943	0.00387536	844
chr12:g.49580148T>A	EXON3	GGCACTA	GGCTCTA	A	T	NM_006009.3:c.320A>T	p.(His107Leu)	0.0011968	0.000670735	0.000670735	0.000846091	3421
chr12:g.49580147G>T	EXON3	GCACTAC	GCAATAC	C	A	NM_006009.3:c.321C>A	p.(His107Gln)	0.00113187	0.000658545	0.000782022	0.00085748	3384
chr12:g.49580147G>C	EXON3	GCACTAC	GCAGTAC	C	G	NM_006009.3:c.321C>G	p.(His107Gln)	0.00316925	0.00154346	0.00203737	0.00225003	1634
chr12:g.49580147G>A	EXON3	GCACTAC	GCATTAC	C	T	NM_006009.3:c.321C>T	p.(=)	0.00648255	0.00298403	0.00364257	0.00436972	676
chr12:g.49580146A>T	EXON3	CACTACA	CACAACA	T	A	NM_006009.3:c.322T>A	p.(Tyr108Asn)	0.000883233	0.000484606	0.000601849	0.000656563	3949
chr12:g.49580146A>G	EXON3	CACTACA	CACCACA	T	C	NM_006009.3:c.322T>C	p.(Tyr108His)	0.00557297	0.00323592	0.00386903	0.00422597	718
chr12:g.49580146A>C	EXON3	CACTACA	CACGACA	T	G	NM_006009.3:c.322T>G	p.(Tyr108Asp)	0.000922315	0.000500238	0.000586217	0.00066959	3915
chr12:g.49580145T>G	EXON3	ACTACAC	ACTCCAC	A	C	NM_006009.3:c.323A>C	p.(Tyr108Ser)	0.00072065	0.000491352	0.000589623	0.000600542	4123
chr12:g.49580145T>C	EXON3	ACTACAC	ACTGCAC	A	G	NM_006009.3:c.323A>G	p.(Tyr108Cys)	0.00787255	0.00544855	0.00563417	0.00631843	221
chr12:g.49580145T>A	EXON3	ACTACAC	ACTTCAC	A	T	NM_006009.3:c.323A>T	p.(Tyr108Phe)	0.000545947	0.000327568	0.000327568	0.000400361	4486
chr12:g.49580144G>T	EXON3	CTACACC	CTAAACC	C	A	NM_006009.3:c.324C>A	p.(Tyr108*)	0.00204512	0.00101463	0.00131585	0.00145853	2278
chr12:g.49580144G>C	EXON3	CTACACC	CTAGACC	C	G	NM_006009.3:c.324C>G	p.(Tyr108*)	0.000729267	0.000507316	0.000554877	0.000597153	4135
chr12:g.49580144G>A	EXON3	CTACACC	CTATACC	C	T	NM_006009.3:c.324C>T	p.(=)	0.0141256	0.00813292	0.00883048	0.010363	90
chr12:g.49580143T>G	EXON3	TACACCA	TACCCCA	A	C	NM_006009.3:c.325A>C	p.(Thr109Pro)	0.00152768	0.00080667	0.00104938	0.00112791	2773
chr12:g.49580143T>C	EXON3	TACACCA	TACGCCA	A	G	NM_006009.3:c.325A>G	p.(Thr109Ala)	0.00520409	0.00290544	0.00339087	0.00383347	860
chr12:g.49580143T>A	EXON3	TACACCA	TACTCCA	A	T	NM_006009.3:c.325A>T	p.(Thr109Ser)	0.00118502	0.000678174	0.000813809	0.000892334	3291
chr12:g.49580142G>T	EXON3	ACACCAT	ACAACAT	C	A	NM_006009.3:c.326C>A	p.(Thr109Asn)	0.00353884	0.00180356	0.00225302	0.0025318	1508
chr12:g.49580142G>C	EXON3	ACACCAT	ACAGCAT	C	G	NM_006009.3:c.326C>G	p.(Thr109Ser)	0.00267973	0.00146219	0.00166701	0.00193631	1828
chr12:g.49580142G>A	EXON3	ACACCAT	ACATCAT	C	T	NM_006009.3:c.326C>T	p.(Thr109Ile)	0.00817574	0.00389727	0.00481327	0.00562876	347
chr12:g.49580141G>T	EXON3	CACCATT	CACAATT	C	A	NM_006009.3:c.327C>A	p.(=)	0.00280611	0.00155313	0.00186757	0.0020756	1729
chr12:g.49580141G>C	EXON3	CACCATT	CACGATT	C	G	NM_006009.3:c.327C>G	p.(=)	0.00149596	0.000728922	0.000933782	0.00105289	2915
chr12:g.49580141G>A	EXON3	CACCATT	CACTATT	C	T	NM_006009.3:c.327C>T	p.(=)	0.00542642	0.00297286	0.00332065	0.00390664	832
chr12:g.49580140T>G	EXON3	ACCATTG	ACCCTTG	A	C	NM_006009.3:c.328A>C	p.(Ile110Leu)	0.00101541	0.000448179	0.00052521	0.000662932	3934
chr12:g.49580140T>C	EXON3	ACCATTG	ACCGTTG	A	G	NM_006009.3:c.328A>G	p.(Ile110Val)	0.00926471	0.0054972	0.00605742	0.00693978	174
chr12:g.49580140T>A	EXON3	ACCATTG	ACCTTTG	A	T	NM_006009.3:c.328A>T	p.(Ile110Phe)	0.00168768	0.00087535	0.000980392	0.00118114	2668
chr12:g.49580139A>T	EXON3	CCATTGG	CCAATGG	T	A	NM_006009.3:c.329T>A	p.(Ile110Asn)	0.00135928	0.000660496	0.000880661	0.000966813	3078
chr12:g.49580139A>G	EXON3	CCATTGG	CCACTGG	T	C	NM_006009.3:c.329T>C	p.(Ile110Thr)	0.03537	0.0185896	0.0213177	0.0250925	73
chr12:g.49580139A>C	EXON3	CCATTGG	CCAGTGG	T	G	NM_006009.3:c.329T>G	p.(Ile110Ser)	0.00106254	0.000612634	0.000670068	0.000781746	3595
chr12:g.49580138A>T	EXON3	CATTGGC	CATAGGC	T	A	NM_006009.3:c.330T>A	p.(=)	0.000787768	0.000465068	0.000512524	0.000588453	4161
chr12:g.49580138A>G	EXON3	CATTGGC	CATCGGC	T	C	NM_006009.3:c.330T>C	p.(=)	0.00424256	0.00253414	0.00305616	0.00327762	1142
chr12:g.49580138A>C	EXON3	CATTGGC	CATGGGC	T	G	NM_006009.3:c.330T>G	p.(Ile110Met)	0.00138571	0.000759294	0.00104403	0.00106301	2889
chr12:g.49580137C>T	EXON3	ATTGGCA	ATTAGCA	G	A	NM_006009.3:c.331G>A	p.(Gly111Ser)	0.00436103	0.00222123	0.00254702	0.00304309	1272
chr12:g.49580137C>G	EXON3	ATTGGCA	ATTCGCA	G	C	NM_006009.3:c.331G>C	p.(Gly111Arg)	0.000651562	0.000340589	0.000562713	0.000518288	4310
chr12:g.49580137C>A	EXON3	ATTGGCA	ATTTGCA	G	T	NM_006009.3:c.331G>T	p.(Gly111Cys)	0.00159188	0.000947727	0.00116985	0.00123649	2585
chr12:g.49580136C>T	EXON3	TTGGCAA	TTGACAA	G	A	NM_006009.3:c.332G>A	p.(Gly111Asp)	0.00782951	0.0039962	0.00500611	0.00561061	352
chr12:g.49580136C>G	EXON3	TTGGCAA	TTGCCAA	G	C	NM_006009.3:c.332G>C	p.(Gly111Ala)	0.0012651	0.000678702	0.000749287	0.000897697	3261
chr12:g.49580136C>A	EXON3	TTGGCAA	TTGTCAA	G	T	NM_006009.3:c.332G>T	p.(Gly111Val)	0.00242704	0.00146057	0.0015583	0.0018153	1921
chr12:g.49580135G>T	EXON3	TGGCAAG	TGGAAAG	C	A	NM_006009.3:c.333C>A	p.(=)	0.00322359	0.00160178	0.00204895	0.00229144	1615
chr12:g.49580135G>C	EXON3	TGGCAAG	TGGGAAG	C	G	NM_006009.3:c.333C>G	p.(=)	0.00166185	0.000941048	0.00116129	0.00125473	2555
chr12:g.49580135G>A	EXON3	TGGCAAG	TGGTAAG	C	T	NM_006009.3:c.333C>T	p.(=)	0.00442493	0.00254951	0.00290991	0.00329478	1131
chr12:g.49580134T>G	EXON3	GGCAAGG	GGCCAGG	A	C	NM_006009.3:c.334A>C	p.(Lys112Gln)	0.0012312	0.000839145	0.000942319	0.00100422	3013
chr12:g.49580134T>C	EXON3	GGCAAGG	GGCGAGG	A	G	NM_006009.3:c.334A>G	p.(Lys112Glu)	0.00427139	0.0028132	0.00321902	0.00343454	1062
chr12:g.49580134T>A	EXON3	GGCAAGG	GGCTAGG	A	T	NM_006009.3:c.334A>T	p.(Lys112*)	0.000474599	0.000295764	0.000398938	0.000389767	4500
chr12:g.49580133T>G	EXON3	GCAAGGA	GCACGGA	A	C	NM_006009.3:c.335A>C	p.(Lys112Thr)	0.000706912	0.000347362	0.000414397	0.000489557	4361
chr12:g.49580133T>C	EXON3	GCAAGGA	GCAGGGA	A	G	NM_006009.3:c.335A>G	p.(Lys112Arg)	0.0033944	0.00206589	0.00224871	0.00256967	1487
chr12:g.49580133T>A	EXON3	GCAAGGA	GCATGGA	A	T	NM_006009.3:c.335A>T	p.(Lys112Met)	0.000658159	0.000341268	0.000414397	0.000471275	4389
chr12:g.49580132C>T	EXON3	CAAGGAG	CAAAGAG	G	A	NM_006009.3:c.336G>A	p.(=)	0.00647041	0.00341353	0.00408095	0.00465496	589
chr12:g.49580132C>G	EXON3	CAAGGAG	CAACGAG	G	C	NM_006009.3:c.336G>C	p.(Lys112Asn)	0.00103425	0.000570619	0.000626662	0.000743843	3706
chr12:g.49580132C>A	EXON3	CAAGGAG	CAATGAG	G	T	NM_006009.3:c.336G>T	p.(Lys112Asn)	0.00122276	0.000713274	0.000769317	0.000901782	3249
chr12:g.49580131C>T	EXON3	AAGGAGA	AAGAAGA	G	A	NM_006009.3:c.337G>A	p.(Glu113Lys)	0.0069287	0.00369166	0.00478218	0.00513418	456
chr12:g.49580131C>G	EXON3	AAGGAGA	AAGCAGA	G	C	NM_006009.3:c.337G>C	p.(Glu113Gln)	0.00189619	0.00113656	0.00125453	0.00142909	2323
chr12:g.49580131C>A	EXON3	AAGGAGA	AAGTAGA	G	T	NM_006009.3:c.337G>T	p.(Glu113*)	0.00143581	0.000782644	0.00097255	0.00106367	2886
chr12:g.49580130T>G	EXON3	AGGAGAT	AGGCGAT	A	C	NM_006009.3:c.338A>C	p.(Glu113Ala)	0.00107312	0.000599571	0.000687406	0.000786698	3585
chr12:g.49580130T>C	EXON3	AGGAGAT	AGGGGAT	A	G	NM_006009.3:c.338A>G	p.(Glu113Gly)	0.00223789	0.00134808	0.00152757	0.00170451	2015
chr12:g.49580130T>A	EXON3	AGGAGAT	AGGTGAT	A	T	NM_006009.3:c.338A>T	p.(Glu113Val)	0.00101965	0.000614846	0.000737052	0.000790517	3569
chr12:g.49580129C>T	EXON3	GGAGATC	GGAAATC	G	A	NM_006009.3:c.339G>A	p.(=)	0.00606647	0.00308926	0.00415369	0.00443648	656
chr12:g.49580129C>G	EXON3	GGAGATC	GGACATC	G	C	NM_006009.3:c.339G>C	p.(Glu113Asp)	0.00180874	0.000888362	0.00103242	0.00124317	2573
chr12:g.49580129C>A	EXON3	GGAGATC	GGATATC	G	T	NM_006009.3:c.339G>T	p.(Glu113Asp)	0.00277713	0.00138456	0.00165668	0.00193946	1825
chr12:g.49580128T>G	EXON3	GAGATCA	GAGCTCA	A	C	NM_006009.3:c.340A>C	p.(Ile114Leu)	0.00100459	0.000584488	0.000593621	0.000727566	3741
chr12:g.49580128T>C	EXON3	GAGATCA	GAGGTCA	A	G	NM_006009.3:c.340A>G	p.(Ile114Val)	0.00437453	0.00267129	0.00326035	0.00343539	1058
chr12:g.49580128T>A	EXON3	GAGATCA	GAGTTCA	A	T	NM_006009.3:c.340A>T	p.(Ile114Phe)	0.00233339	0.00139729	0.00152972	0.00175346	1964
chr12:g.49580127A>T	EXON3	AGATCAT	AGAACAT	T	A	NM_006009.3:c.341T>A	p.(Ile114Asn)	0.0029881	0.00157116	0.0017302	0.00209649	1722
chr12:g.49580127A>G	EXON3	AGATCAT	AGACCAT	T	C	NM_006009.3:c.341T>C	p.(Ile114Thr)	0.00480023	0.00267483	0.0031857	0.00355359	995
chr12:g.49580127A>C	EXON3	AGATCAT	AGAGCAT	T	G	NM_006009.3:c.341T>G	p.(Ile114Ser)	0.000857873	0.00048677	0.000520507	0.000621717	4058
chr12:g.49580126G>T	EXON3	GATCATT	GATAATT	C	A	NM_006009.3:c.342C>A	p.(=)	0.00434553	0.00236682	0.00266585	0.00312607	1226
chr12:g.49580126G>C	EXON3	GATCATT	GATGATT	C	G	NM_006009.3:c.342C>G	p.(Ile114Met)	0.0019469	0.00112615	0.00119613	0.00142306	2336
chr12:g.49580126G>A	EXON3	GATCATT	GATTATT	C	T	NM_006009.3:c.342C>T	p.(=)	0.00395742	0.00218231	0.00257042	0.00290338	1348
chr12:g.49580125T>G	EXON3	ATCATTG	ATCCTTG	A	C	NM_006009.3:c.343A>C	p.(Ile115Leu)	0.00103934	0.000622431	0.000710511	0.000790761	3567
chr12:g.49580125T>C	EXON3	ATCATTG	ATCGTTG	A	G	NM_006009.3:c.343A>G	p.(Ile115Val)	0.00747504	0.00410452	0.00475044	0.00544333	389
chr12:g.49580125T>A	EXON3	ATCATTG	ATCTTTG	A	T	NM_006009.3:c.343A>T	p.(Ile115Phe)	0.00198473	0.000963006	0.00119201	0.00137992	2390
chr12:g.49580124A>T	EXON3	TCATTGA	TCAATGA	T	A	NM_006009.3:c.344T>A	p.(Ile115Asn)	0.00158065	0.000875904	0.00102692	0.00116116	2713
chr12:g.49580124A>G	EXON3	TCATTGA	TCACTGA	T	C	NM_006009.3:c.344T>C	p.(Ile115Thr)	0.0283511	0.0147897	0.0165767	0.0199058	75
chr12:g.49580124A>C	EXON3	TCATTGA	TCAGTGA	T	G	NM_006009.3:c.344T>G	p.(Ile115Ser)	0.000850734	0.000478223	0.0005638	0.000630919	4026
chr12:g.49580123A>T	EXON3	CATTGAC	CATAGAC	T	A	NM_006009.3:c.345T>A	p.(=)	0.000613291	0.000415455	0.000464914	0.000497887	4352
chr12:g.49580123A>G	EXON3	CATTGAC	CATCGAC	T	C	NM_006009.3:c.345T>C	p.(=)	0.00331375	0.00200803	0.00230479	0.00254219	1503
chr12:g.49580123A>C	EXON3	CATTGAC	CATGGAC	T	G	NM_006009.3:c.345T>G	p.(Ile115Met)	0.00137496	0.000741884	0.000840802	0.000985881	3044
chr12:g.49580122C>T	EXON3	ATTGACC	ATTAACC	G	A	NM_006009.3:c.346G>A	p.(Asp116Asn)	0.00345515	0.00181979	0.00223785	0.00250426	1518
chr12:g.49580122C>G	EXON3	ATTGACC	ATTCACC	G	C	NM_006009.3:c.346G>C	p.(Asp116His)	0.00188127	0.0008976	0.00110663	0.00129517	2492
chr12:g.49580122C>A	EXON3	ATTGACC	ATTTACC	G	T	NM_006009.3:c.346G>T	p.(Asp116Tyr)	0.00151239	0.000885304	0.00100826	0.00113532	2763
chr12:g.49580121T>G	EXON3	TTGACCT	TTGCCCT	A	C	NM_006009.3:c.347A>C	p.(Asp116Ala)	0.00110503	0.000645711	0.000745563	0.000832102	3460
chr12:g.49580121T>C	EXON3	TTGACCT	TTGGCCT	A	G	NM_006009.3:c.347A>G	p.(Asp116Gly)	0.00392086	0.00240977	0.00267604	0.00300222	1294
chr12:g.49580121T>A	EXON3	TTGACCT	TTGTCCT	A	T	NM_006009.3:c.347A>T	p.(Asp116Val)	0.00161761	0.000985209	0.00103181	0.00121154	2618
chr12:g.49580120G>T	EXON3	TGACCTC	TGAACTC	C	A	NM_006009.3:c.348C>A	p.(Asp116Glu)	0.00284528	0.00153283	0.00174664	0.00204159	1756
chr12:g.49580120G>C	EXON3	TGACCTC	TGAGCTC	C	G	NM_006009.3:c.348C>G	p.(Asp116Glu)	0.00121048	0.000736813	0.000743392	0.000896895	3268
chr12:g.49580120G>A	EXON3	TGACCTC	TGATCTC	C	T	NM_006009.3:c.348C>T	p.(=)	0.00714446	0.0036413	0.00483863	0.00520813	441
chr12:g.49580119G>T	EXON3	GACCTCG	GACATCG	C	A	NM_006009.3:c.349C>A	p.(Leu117Ile)	0.00149636	0.000724043	0.000901031	0.00104048	2948
chr12:g.49580119G>C	EXON3	GACCTCG	GACGTCG	C	G	NM_006009.3:c.349C>G	p.(Leu117Val)	0.00178597	0.000949301	0.00102975	0.00125501	2553
chr12:g.49580119G>A	EXON3	GACCTCG	GACTTCG	C	T	NM_006009.3:c.349C>T	p.(Leu117Phe)	0.00664511	0.00353977	0.00423163	0.0048055	542
chr12:g.49580118A>T	EXON3	ACCTCGT	ACCACGT	T	A	NM_006009.3:c.350T>A	p.(Leu117His)	0.000901212	0.000465626	0.000660889	0.000675909	3895
chr12:g.49580118A>G	EXON3	ACCTCGT	ACCCCGT	T	C	NM_006009.3:c.350T>C	p.(Leu117Pro)	0.00294396	0.00196765	0.00226805	0.00239322	1562
chr12:g.49580118A>C	EXON3	ACCTCGT	ACCGCGT	T	G	NM_006009.3:c.350T>G	p.(Leu117Arg)	0.000841131	0.000420566	0.000540727	0.000600808	4120
chr12:g.49580117G>T	EXON3	CCTCGTG	CCTAGTG	C	A	NM_006009.3:c.351C>A	p.(=)	0.00236121	0.00128139	0.00148295	0.00170852	2013
chr12:g.49580117G>C	EXON3	CCTCGTG	CCTGGTG	C	G	NM_006009.3:c.351C>G	p.(=)	0.00454964	0.00276434	0.00331145	0.00354181	1005
chr12:g.49580117G>A	EXON3	CCTCGTG	CCTTGTG	C	T	NM_006009.3:c.351C>T	p.(=)	0.0498301	0.0266644	0.0322218	0.0362388	69
chr12:g.49580116C>T	EXON3	CTCGTGT	CTCATGT	G	A	NM_006009.3:c.352G>A	p.(Val118Met)	0.0932395	0.0522804	0.0617608	0.0690935	19
chr12:g.49580116C>G	EXON3	CTCGTGT	CTCCTGT	G	C	NM_006009.3:c.352G>C	p.(Val118Leu)	0.00685719	0.00404989	0.00437204	0.00509304	462
chr12:g.49580116C>A	EXON3	CTCGTGT	CTCTTGT	G	T	NM_006009.3:c.352G>T	p.(Val118Leu)	0.00667311	0.00391182	0.00432602	0.00497032	493
chr12:g.49580115A>T	EXON3	TCGTGTT	TCGAGTT	T	A	NM_006009.3:c.353T>A	p.(Val118Glu)	0.00090854	0.00045427	0.000870684	0.000744498	3704
chr12:g.49580115A>G	EXON3	TCGTGTT	TCGCGTT	T	C	NM_006009.3:c.353T>C	p.(Val118Ala)	0.00397486	0.00249849	0.00295276	0.00314204	1216
chr12:g.49580115A>C	EXON3	TCGTGTT	TCGGGTT	T	G	NM_006009.3:c.353T>G	p.(Val118Gly)	0.00121139	0.000832829	0.000870684	0.000971633	3070
chr12:g.49580114C>T	EXON3	CGTGTTG	CGTATTG	G	A	NM_006009.3:c.354G>A	p.(=)	0.00617449	0.00337094	0.00380482	0.00445008	653
chr12:g.49580114C>G	EXON3	CGTGTTG	CGTCTTG	G	C	NM_006009.3:c.354G>C	p.(=)	0.00153528	0.000667512	0.000967893	0.00105689	2900
chr12:g.49580114C>A	EXON3	CGTGTTG	CGTTTTG	G	T	NM_006009.3:c.354G>T	p.(=)	0.00203591	0.00120152	0.0015019	0.00157978	2140
chr12:g.49580113A>T	EXON3	GTGTTGG	GTGATGG	T	A	NM_006009.3:c.355T>A	p.(Leu119Met)	0.00120381	0.000708124	0.000804686	0.00090554	3236
chr12:g.49580113A>G	EXON3	GTGTTGG	GTGCTGG	T	C	NM_006009.3:c.355T>C	p.(=)	0.00833012	0.00500837	0.00558774	0.00630874	226
chr12:g.49580113A>C	EXON3	GTGTTGG	GTGGTGG	T	G	NM_006009.3:c.355T>G	p.(Leu119Val)	0.00168019	0.001133	0.00117806	0.00133041	2433
chr12:g.49580112A>T	EXON3	TGTTGGA	TGTAGGA	T	A	NM_006009.3:c.356T>A	p.(Leu119*)	0.000558106	0.000356728	0.000402757	0.000439197	4439
chr12:g.49580112A>G	EXON3	TGTTGGA	TGTCGGA	T	C	NM_006009.3:c.356T>C	p.(Leu119Ser)	0.00291711	0.00151322	0.0019505	0.00212694	1707
chr12:g.49580112A>C	EXON3	TGTTGGA	TGTGGGA	T	G	NM_006009.3:c.356T>G	p.(Leu119Trp)	0.00128307	0.000650165	0.000794007	0.00090908	3228
chr12:g.49580111C>T	EXON3	GTTGGAC	GTTAGAC	G	A	NM_006009.3:c.357G>A	p.(=)	0.00473824	0.00245992	0.00303776	0.00341197	1083
chr12:g.49580111C>G	EXON3	GTTGGAC	GTTCGAC	G	C	NM_006009.3:c.357G>C	p.(Leu119Phe)	0.000709911	0.000313681	0.000412739	0.000478777	4376
chr12:g.49580111C>A	EXON3	GTTGGAC	GTTTGAC	G	T	NM_006009.3:c.357G>T	p.(Leu119Phe)	0.00110614	0.000693401	0.000610853	0.000803465	3542
chr12:g.49580110C>T	EXON3	TTGGACC	TTGAACC	G	A	NM_006009.3:c.358G>A	p.(Asp120Asn)	0.00494569	0.00295831	0.00336792	0.00375731	895
chr12:g.49580110C>G	EXON3	TTGGACC	TTGCACC	G	C	NM_006009.3:c.358G>C	p.(Asp120His)	0.00192669	0.000895079	0.00100127	0.00127435	2518
chr12:g.49580110C>A	EXON3	TTGGACC	TTGTACC	G	T	NM_006009.3:c.358G>T	p.(Asp120Tyr)	0.00183567	0.00116815	0.00125918	0.001421	2340
chr12:g.49580109T>G	EXON3	TGGACCG	TGGCCCG	A	C	NM_006009.3:c.359A>C	p.(Asp120Ala)	0.000964506	0.000675154	0.000771605	0.000803755	3537
chr12:g.49580109T>C	EXON3	TGGACCG	TGGGCCG	A	G	NM_006009.3:c.359A>G	p.(Asp120Gly)	0.00511188	0.00308642	0.00376157	0.00398663	804
chr12:g.49580109T>A	EXON3	TGGACCG	TGGTCCG	A	T	NM_006009.3:c.359A>T	p.(Asp120Val)	0.000868056	0.000771605	0.000578704	0.000739455	3716
chr12:g.49580108G>T	EXON3	GGACCGA	GGAACGA	C	A	NM_006009.3:c.360C>A	p.(Asp120Glu)	0.00247959	0.00165306	0.00154975	0.00189413	1862
chr12:g.49580108G>C	EXON3	GGACCGA	GGAGCGA	C	G	NM_006009.3:c.360C>G	p.(Asp120Glu)	0.00134311	0.00113648	0.000723215	0.0010676	2879
chr12:g.49580108G>A	EXON3	GGACCGA	GGATCGA	C	T	NM_006009.3:c.360C>T	p.(=)	0.00495919	0.00227296	0.00330613	0.00351276	1016
chr12:g.49580107G>T	EXON3	GACCGAA	GACAGAA	C	A	NM_006009.3:c.361C>A	p.(=)	0.00994201	0.00635184	0.00607567	0.0074565	137
chr12:g.49580107G>C	EXON3	GACCGAA	GACGGAA	C	G	NM_006009.3:c.361C>G	p.(Arg121Gly)	0.00607567	0.00386633	0.00423456	0.00472552	574
chr12:g.49580107G>A	EXON3	GACCGAA	GACTGAA	C	T	NM_006009.3:c.361C>T	p.(Arg121*)	0.0940808	0.0518273	0.0602044	0.0687042	20
chr12:g.49580106C>T	EXON3	ACCGAAT	ACCAAAT	G	A	NM_006009.3:c.362G>A	p.(Arg121Gln)	0.0846639	0.0440055	0.0544307	0.0610334	36
chr12:g.49580106C>G	EXON3	ACCGAAT	ACCCAAT	G	C	NM_006009.3:c.362G>C	p.(Arg121Pro)	0.00301783	0.00213992	0.00213992	0.00243256	1546
chr12:g.49580106C>A	EXON3	ACCGAAT	ACCTAAT	G	T	NM_006009.3:c.362G>T	p.(Arg121Leu)	0.0061454	0.00329218	0.00323731	0.00422497	719
chr12:g.49580105T>G	EXON3	CCGAATT	CCGCATT	A	C	NM_006009.3:c.363A>C	p.(=)	0.000969619	0.00070028	0.000646412	0.000772104	3639
chr12:g.49580105T>C	EXON3	CCGAATT	CCGGATT	A	G	NM_006009.3:c.363A>G	p.(=)	0.00118509	0.000861883	0.000808016	0.000951663	3114
chr12:g.49580105T>A	EXON3	CCGAATT	CCGTATT	A	T	NM_006009.3:c.363A>T	p.(=)	0.00129283	0.000592545	0.00102349	0.000969619	3075
chr12:g.49580104T>G	EXON3	CGAATTC	CGACTTC	A	C	NM_006009.3:c.364A>C	p.(Ile122Leu)	0.00123215	0.000775795	0.000684525	0.000897488	3263
chr12:g.49580104T>C	EXON3	CGAATTC	CGAGTTC	A	G	NM_006009.3:c.364A>G	p.(Ile122Val)	0.0036508	0.00228175	0.00232739	0.00275331	1413
chr12:g.49580104T>A	EXON3	CGAATTC	CGATTTC	A	T	NM_006009.3:c.364A>T	p.(Ile122Phe)	0.00168849	0.00100397	0.00123215	0.0013082	2469
chr12:g.49580103A>T	EXON3	GAATTCG	GAAATCG	T	A	NM_006009.3:c.365T>A	p.(Ile122Asn)	0.00168849	0.00100397	0.00123215	0.0013082	2470
chr12:g.49580103A>G	EXON3	GAATTCG	GAACTCG	T	C	NM_006009.3:c.365T>C	p.(Ile122Thr)	0.0036508	0.00228175	0.00232739	0.00275331	1414
chr12:g.49580103A>C	EXON3	GAATTCG	GAAGTCG	T	G	NM_006009.3:c.365T>G	p.(Ile122Ser)	0.00123215	0.000775795	0.000684525	0.000897488	3264
chr12:g.49580102A>T	EXON3	AATTCGC	AATACGC	T	A	NM_006009.3:c.366T>A	p.(=)	0.00128966	0.000773794	0.00103173	0.00103173	2964
chr12:g.49580102A>G	EXON3	AATTCGC	AATCCGC	T	C	NM_006009.3:c.366T>C	p.(=)	0.00171954	0.00137563	0.00146161	0.00151893	2208
chr12:g.49580102A>C	EXON3	AATTCGC	AATGCGC	T	G	NM_006009.3:c.366T>G	p.(Ile122Met)	0.00103173	0.000945748	0.000343909	0.000773794	3632
chr12:g.49580101G>T	EXON3	ATTCGCA	ATTAGCA	C	A	NM_006009.3:c.367C>A	p.(Arg123Ser)	0.00629696	0.00343471	0.00407871	0.00460346	600
chr12:g.49580101G>C	EXON3	ATTCGCA	ATTGGCA	C	G	NM_006009.3:c.367C>G	p.(Arg123Gly)	0.00364937	0.00150268	0.00221825	0.00245677	1534
chr12:g.49580101G>A	EXON3	ATTCGCA	ATTTGCA	C	T	NM_006009.3:c.367C>T	p.(Arg123Cys)	0.0897317	0.0498032	0.0548122	0.0647823	26
chr12:g.49580100C>T	EXON3	TTCGCAA	TTCACAA	G	A	NM_006009.3:c.368G>A	p.(Arg123His)	0.111353	0.0637863	0.0761892	0.0837763	6
chr12:g.49580100C>G	EXON3	TTCGCAA	TTCCCAA	G	C	NM_006009.3:c.368G>C	p.(Arg123Pro)	0.00647404	0.0044296	0.00565626	0.00551997	371
chr12:g.49580100C>A	EXON3	TTCGCAA	TTCTCAA	G	T	NM_006009.3:c.368G>T	p.(Arg123Leu)	0.0160147	0.00872291	0.00960883	0.0114488	86
chr12:g.49580099G>T	EXON3	TCGCAAG	TCGAAAG	C	A	NM_006009.3:c.369C>A	p.(=)	0.00162886	0.000784266	0.000965251	0.00112613	2777
chr12:g.49580099G>C	EXON3	TCGCAAG	TCGGAAG	C	G	NM_006009.3:c.369C>G	p.(=)	0.00150821	0.00108591	0.00114624	0.00124678	2564
chr12:g.49580099G>A	EXON3	TCGCAAG	TCGTAAG	C	T	NM_006009.3:c.369C>T	p.(=)	0.00392133	0.00180985	0.00205116	0.00259411	1482
chr12:g.49580098T>G	EXON3	CGCAAGC	CGCCAGC	A	C	NM_006009.3:c.370A>C	p.(Lys124Gln)	0.00168124	0.000840619	0.00159718	0.00137301	2395
chr12:g.49580098T>C	EXON3	CGCAAGC	CGCGAGC	A	G	NM_006009.3:c.370A>G	p.(Lys124Glu)	0.00411903	0.00268998	0.00336248	0.0033905	1093
chr12:g.49580098T>A	EXON3	CGCAAGC	CGCTAGC	A	T	NM_006009.3:c.370A>T	p.(Lys124*)	0.000420309	0.000168124	0.000336247	0.000308227	4537
chr12:g.49580097T>G	EXON3	GCAAGCT	GCACGCT	A	C	NM_006009.3:c.371A>C	p.(Lys124Thr)	0.000771055	0.000458268	0.000509187	0.000579503	4180
chr12:g.49580097T>C	EXON3	GCAAGCT	GCAGGCT	A	G	NM_006009.3:c.371A>G	p.(Lys124Arg)	0.00334609	0.00184035	0.00217496	0.0024538	1538
chr12:g.49580097T>A	EXON3	GCAAGCT	GCATGCT	A	T	NM_006009.3:c.371A>T	p.(Lys124Met)	0.000720136	0.00044372	0.000465543	0.000543133	4260
chr12:g.49580096C>T	EXON3	CAAGCTG	CAAACTG	G	A	NM_006009.3:c.372G>A	p.(=)	0.00578003	0.00291477	0.00354599	0.00408026	767
chr12:g.49580096C>G	EXON3	CAAGCTG	CAACCTG	G	C	NM_006009.3:c.372G>C	p.(Lys124Asn)	0.00192461	0.0010211	0.00125007	0.00139859	2366
chr12:g.49580096C>A	EXON3	CAAGCTG	CAATCTG	G	T	NM_006009.3:c.372G>T	p.(Lys124Asn)	0.00110155	0.000606469	0.000730239	0.000812751	3517
chr12:g.49580095G>T	EXON3	AAGCTGG	AAGATGG	C	A	NM_006009.3:c.373C>A	p.(Leu125Met)	0.00167303	0.000803982	0.000966637	0.00114788	2736
chr12:g.49580095G>C	EXON3	AAGCTGG	AAGGTGG	C	G	NM_006009.3:c.373C>G	p.(Leu125Val)	0.00278373	0.00147319	0.00160796	0.00195496	1811
chr12:g.49580095G>A	EXON3	AAGCTGG	AAGTTGG	C	T	NM_006009.3:c.373C>T	p.(=)	0.00487036	0.0028395	0.00299286	0.00356757	987
chr12:g.49580094A>T	EXON3	AGCTGGT	AGCAGGT	T	A	NM_006009.3:c.374T>A	p.(Leu125Gln)	0.0010554	0.000567279	0.000672819	0.000765167	3651
chr12:g.49580094A>G	EXON3	AGCTGGT	AGCCGGT	T	C	NM_006009.3:c.374T>C	p.(Leu125Pro)	0.00373348	0.0022889	0.00262531	0.00288257	1358
chr12:g.49580094A>C	EXON3	AGCTGGT	AGCGGGT	T	G	NM_006009.3:c.374T>G	p.(Leu125Arg)	0.000765166	0.000362794	0.00044195	0.000523303	4296
chr12:g.49580093C>T	EXON3	GCTGGTA	GCTAGTA	G	A	NM_006009.3:c.375G>A	p.(=)	0.0063629	0.00333147	0.00370393	0.0044661	645
chr12:g.49580093C>G	EXON3	GCTGGTA	GCTCGTA	G	C	NM_006009.3:c.375G>C	p.(=)	0.00146916	0.000775964	0.000879426	0.00104152	2947
chr12:g.49580093C>A	EXON3	GCTGGTA	GCTTGTA	G	T	NM_006009.3:c.375G>T	p.(=)	0.00243135	0.00143812	0.00173816	0.00186921	1881
chr12:g.49580092C>T	INTRON3	CTGGTAT	CTGATAT	G	A	NM_006009.3:c.375+1G>A		0.0079097	0.00417224	0.00522575	0.00576923	317
chr12:g.49580092C>G	INTRON3	CTGGTAT	CTGCTAT	G	C	NM_006009.3:c.375+1G>C		0.0029097	0.00149666	0.00174749	0.00205128	1747
chr12:g.49580092C>A	INTRON3	CTGGTAT	CTGTTAT	G	T	NM_006009.3:c.375+1G>T		0.0038796	0.0019816	0.00232441	0.00272854	1432
chr12:g.49580091A>T	INTRON3	TGGTATG	TGGAATG	T	A	NM_006009.3:c.375+2T>A		0.000974894	0.000552153	0.000586662	0.00070457	3809
chr12:g.49580091A>G	INTRON3	TGGTATG	TGGCATG	T	C	NM_006009.3:c.375+2T>C		0.00549564	0.00337331	0.00388232	0.00425042	714
chr12:g.49580091A>C	INTRON3	TGGTATG	TGGGATG	T	G	NM_006009.3:c.375+2T>G		0.000871366	0.000664309	0.000621172	0.000718949	3767
chr12:g.49580090T>G	INTRON3	GGTATGT	GGTCTGT	A	C	NM_006009.3:c.375+3A>C		0.000597499	0.00038347	0.000454813	0.000478594	4377
chr12:g.49580090T>C	INTRON3	GGTATGT	GGTGTGT	A	G	NM_006009.3:c.375+3A>G		0.00972051	0.00539533	0.00625145	0.00712243	159
chr12:g.49580090T>A	INTRON3	GGTATGT	GGTTTGT	A	T	NM_006009.3:c.375+3A>T		0.00173007	0.000909626	0.000980969	0.00120689	2628
chr12:g.49580089A>T	INTRON3	GTATGTT	GTAAGTT	T	A	NM_006009.3:c.375+4T>A		0.00243222	0.00138747	0.00134877	0.00172282	1991
chr12:g.49580089A>G	INTRON3	GTATGTT	GTACGTT	T	C	NM_006009.3:c.375+4T>C		0.00809265	0.00456593	0.00542826	0.00602895	263
chr12:g.49580089A>C	INTRON3	GTATGTT	GTAGGTT	T	G	NM_006009.3:c.375+4T>G		0.00181311	0.000945248	0.0010558	0.00127139	2521
chr12:g.49580088C>T	INTRON3	TATGTTT	TATATTT	G	A	NM_006009.3:c.375+5G>A		0.00833667	0.00453916	0.00527827	0.00605137	254
chr12:g.49580088C>G	INTRON3	TATGTTT	TATCTTT	G	C	NM_006009.3:c.375+5G>C		0.00119022	0.000708528	0.000792633	0.000897128	3266
chr12:g.49580088C>A	INTRON3	TATGTTT	TATTTTT	G	T	NM_006009.3:c.375+5G>T		0.00181719	0.00120042	0.00129217	0.00143659	2308
chr12:g.49580087A>T	INTRON3	ATGTTTC	ATGATTC	T	A	NM_006009.3:c.375+6T>A		0.00113971	0.00073674	0.000805936	0.000894128	3282
chr12:g.49580087A>G	INTRON3	ATGTTTC	ATGCTTC	T	C	NM_006009.3:c.375+6T>C		0.00408667	0.00223464	0.00254806	0.00295646	1320
chr12:g.49580087A>C	INTRON3	ATGTTTC	ATGGTTC	T	G	NM_006009.3:c.375+6T>G		0.000858851	0.000521009	0.000618699	0.000666186	3928
chr12:g.49580086A>T	INTRON3	TGTTTCT	TGTATCT	T	A	NM_006009.3:c.375+7T>A		0.000514469	0.000300107	0.000333954	0.000382843	4505
chr12:g.49580086A>G	INTRON3	TGTTTCT	TGTCTCT	T	C	NM_006009.3:c.375+7T>C		0.00176003	0.00112371	0.00124781	0.00137718	2392
chr12:g.49580086A>C	INTRON3	TGTTTCT	TGTGTCT	T	G	NM_006009.3:c.375+7T>G		0.00106956	0.00060924	0.000665651	0.000781482	3597
chr12:g.49580085A>T	INTRON3	GTTTCTT	GTTACTT	T	A	NM_006009.3:c.375+8T>A		0.000697984	0.000405281	0.000450312	0.000517859	4312
chr12:g.49580085A>G	INTRON3	GTTTCTT	GTTCCTT	T	C	NM_006009.3:c.375+8T>C		0.00251049	0.0015198	0.00167741	0.00190257	1853
chr12:g.49580085A>C	INTRON3	GTTTCTT	GTTGCTT	T	G	NM_006009.3:c.375+8T>G		0.00125525	0.000692355	0.00079649	0.000914697	3214
chr12:g.49580084G>T	INTRON3	TTTCTTT	TTTATTT	C	A	NM_006009.3:c.375+9C>A		0.00526276	0.00288765	0.0032306	0.00379367	879
chr12:g.49580084G>C	INTRON3	TTTCTTT	TTTGTTT	C	G	NM_006009.3:c.375+9C>G		0.00208169	0.00117592	0.00138679	0.00154813	2182
chr12:g.49580084G>A	INTRON3	TTTCTTT	TTTTTTT	C	T	NM_006009.3:c.375+9C>T		0.0033184	0.00220176	0.00261524	0.0027118	1439
chr12:g.49580083A>T	INTRON3	TTCTTTT	TTCATTT	T	A	NM_006009.3:c.375+10T>A		0.000742666	0.00042001	0.000468223	0.000543633	4259
chr12:g.49580083A>G	INTRON3	TTCTTTT	TTCCTTT	T	C	NM_006009.3:c.375+10T>C		0.00376525	0.00206852	0.00244125	0.00275834	1412
chr12:g.49580083A>C	INTRON3	TTCTTTT	TTCGTTT	T	G	NM_006009.3:c.375+10T>G		0.000853927	0.000450606	0.000529416	0.000611316	4092
chr12:g.49580082A>T	INTRON3	TCTTTTC	TCTATTC	T	A	NM_006009.3:c.375+11T>A		0.000485021	0.000298773	0.000308473	0.000364089	4514
chr12:g.49580082A>G	INTRON3	TCTTTTC	TCTCTTC	T	C	NM_006009.3:c.375+11T>C		0.00263463	0.00157729	0.0018004	0.00200411	1781
chr12:g.49580082A>C	INTRON3	TCTTTTC	TCTGTTC	T	G	NM_006009.3:c.375+11T>G		0.000797374	0.000442339	0.000558744	0.000599486	4128
chr12:g.49580081A>T	INTRON3	CTTTTCA	CTTATCA	T	A	NM_006009.3:c.375+12T>A		0.000372626	0.000226938	0.00024655	0.000282038	4545
chr12:g.49580081A>G	INTRON3	CTTTTCA	CTTCTCA	T	C	NM_006009.3:c.375+12T>C		0.00295299	0.00168382	0.00191917	0.00218533	1674
chr12:g.49580081A>C	INTRON3	CTTTTCA	CTTGTCA	T	G	NM_006009.3:c.375+12T>G		0.000736847	0.000473488	0.000493099	0.000567811	4207
chr12:g.49580080A>T	INTRON3	TTTTCAA	TTTACAA	T	A	NM_006009.3:c.375+13T>A		0.000705008	0.000411893	0.000457872	0.000524924	4293
chr12:g.49580080A>G	INTRON3	TTTTCAA	TTTCCAA	T	C	NM_006009.3:c.375+13T>C		0.0030231	0.00163799	0.00189854	0.00218655	1669
chr12:g.49580080A>C	INTRON3	TTTTCAA	TTTGCAA	T	G	NM_006009.3:c.375+13T>G		0.0011648	0.00068585	0.000760566	0.000870404	3355
chr12:g.49580079G>T	INTRON3	TTTCAAG	TTTAAAG	C	A	NM_006009.3:c.375+14C>A		0.00125219	0.000719185	0.000854261	0.000941877	3136
chr12:g.49580079G>C	INTRON3	TTTCAAG	TTTGAAG	C	G	NM_006009.3:c.375+14C>G		0.00193121	0.00101854	0.00123393	0.00139456	2376
chr12:g.49580079G>A	INTRON3	TTTCAAG	TTTTAAG	C	T	NM_006009.3:c.375+14C>T		0.0034353	0.00194217	0.00227438	0.00255061	1497
chr12:g.49580078T>G	INTRON3	TTCAAGA	TTCCAGA	A	C	NM_006009.3:c.375+15A>C		0.00144724	0.000736885	0.000899	0.00102771	2970
chr12:g.49580078T>C	INTRON3	TTCAAGA	TTCGAGA	A	G	NM_006009.3:c.375+15A>G		0.00428867	0.00278837	0.00312439	0.00340048	1086
chr12:g.49580078T>A	INTRON3	TTCAAGA	TTCTAGA	A	T	NM_006009.3:c.375+15A>T		0.00055119	0.000280016	0.00034781	0.000393005	4495
chr12:g.49580077T>G	INTRON3	TCAAGAA	TCACGAA	A	C	NM_006009.3:c.375+16A>C		0.000762889	0.000318819	0.000459252	0.000513653	4319
chr12:g.49580077T>C	INTRON3	TCAAGAA	TCAGGAA	A	G	NM_006009.3:c.375+16A>G		0.00530227	0.00305915	0.00327169	0.0038777	843
chr12:g.49580077T>A	INTRON3	TCAAGAA	TCATGAA	A	T	NM_006009.3:c.375+16A>T		0.000607275	0.000379547	0.00040232	0.000463047	4402
chr12:g.49580076C>T	INTRON3	CAAGAAT	CAAAAAT	G	A	NM_006009.3:c.375+17G>A		0.00387011	0.00200008	0.00261894	0.00282971	1383
chr12:g.49580076C>G	INTRON3	CAAGAAT	CAACAAT	G	C	NM_006009.3:c.375+17G>C		0.00189245	0.00102246	0.00117942	0.00136478	2405
chr12:g.49580076C>A	INTRON3	CAAGAAT	CAATAAT	G	T	NM_006009.3:c.375+17G>T		0.00440825	0.00232745	0.0025741	0.00310326	1232
chr12:g.49580075T>G	INTRON3	AAGAATA	AAGCATA	A	C	NM_006009.3:c.375+18A>C		0.00115923	0.000602802	0.000703724	0.00082192	3489
chr12:g.49580075T>C	INTRON3	AAGAATA	AAGGATA	A	G	NM_006009.3:c.375+18A>G		0.00237302	0.00132016	0.00160656	0.00176658	1953
chr12:g.49580075T>A	INTRON3	AAGAATA	AAGTATA	A	T	NM_006009.3:c.375+18A>T		0.00102831	0.000567343	0.000575526	0.000723726	3751
chr12:g.49580074T>G	INTRON3	AGAATAA	AGACTAA	A	C	NM_006009.3:c.375+19A>C		0.0010187	0.000549497	0.00068499	0.000751063	3680
chr12:g.49580074T>C	INTRON3	AGAATAA	AGAGTAA	A	G	NM_006009.3:c.375+19A>G		0.00496053	0.00268225	0.00300844	0.00355041	999
chr12:g.49580074T>A	INTRON3	AGAATAA	AGATTAA	A	T	NM_006009.3:c.375+19A>T		0.000697536	0.000471715	0.000481751	0.000550334	4246
chr12:g.49580073A>T	INTRON3	GAATAAA	GAAAAAA	T	A	NM_006009.3:c.375+20T>A		0.00184854	0.00104246	0.00120321	0.00136474	2406
chr12:g.49580073A>G	INTRON3	GAATAAA	GAACAAA	T	C	NM_006009.3:c.375+20T>C		0.00388856	0.00211566	0.0025577	0.00285397	1373
chr12:g.49580073A>C	INTRON3	GAATAAA	GAAGAAA	T	G	NM_006009.3:c.375+20T>G		0.00132613	0.000865175	0.000940818	0.00104404	2941
chr12:g.49579793C>T	INTRON3	TCTGTTC	TCTATTC	G	A	NM_006009.3:c.376-20G>A		0.00681538	0.00385922	0.00445739	0.00504399	480
chr12:g.49579793C>G	INTRON3	TCTGTTC	TCTCTTC	G	C	NM_006009.3:c.376-20G>C		0.00438407	0.00229237	0.00275548	0.00314397	1214
chr12:g.49579793C>A	INTRON3	TCTGTTC	TCTTTTC	G	T	NM_006009.3:c.376-20G>T		0.00242359	0.0011925	0.00143563	0.0016839	2036
chr12:g.49579792A>T	INTRON3	CTGTTCC	CTGATCC	T	A	NM_006009.3:c.376-19T>A		0.000847486	0.000487443	0.000509599	0.000614843	4078
chr12:g.49579792A>G	INTRON3	CTGTTCC	CTGCTCC	T	C	NM_006009.3:c.376-19T>C		0.00454208	0.00253692	0.00311299	0.00339733	1089
chr12:g.49579792A>C	INTRON3	CTGTTCC	CTGGTCC	T	G	NM_006009.3:c.376-19T>G		0.000686851	0.000332347	0.000360043	0.000459747	4409
chr12:g.49579791A>T	INTRON3	TGTTCCT	TGTACCT	T	A	NM_006009.3:c.376-18T>A		0.000880423	0.000444213	0.000548263	0.0006243	4044
chr12:g.49579791A>G	INTRON3	TGTTCCT	TGTCCCT	T	C	NM_006009.3:c.376-18T>C		0.00252921	0.00147671	0.00169681	0.00190091	1854
chr12:g.49579791A>C	INTRON3	TGTTCCT	TGTGCCT	T	G	NM_006009.3:c.376-18T>G		0.000828398	0.000528254	0.000592284	0.000649645	3972
chr12:g.49579790G>T	INTRON3	GTTCCTC	GTTACTC	C	A	NM_006009.3:c.376-17C>A		0.00156201	0.000716592	0.0010306	0.00110307	2823
chr12:g.49579790G>C	INTRON3	GTTCCTC	GTTGCTC	C	G	NM_006009.3:c.376-17C>G		0.00140098	0.000845417	0.00090983	0.00105207	2917
chr12:g.49579790G>A	INTRON3	GTTCCTC	GTTTCTC	C	T	NM_006009.3:c.376-17C>T		0.00639297	0.00332531	0.00464577	0.00478801	552
chr12:g.49579789G>T	INTRON3	TTCCTCT	TTCATCT	C	A	NM_006009.3:c.376-16C>A		0.00128105	0.000716201	0.000767551	0.000921602	3190
chr12:g.49579789G>C	INTRON3	TTCCTCT	TTCGTCT	C	G	NM_006009.3:c.376-16C>G		0.00161078	0.000813496	0.00099187	0.00113871	2757
chr12:g.49579789G>A	INTRON3	TTCCTCT	TTCTTCT	C	T	NM_006009.3:c.376-16C>T		0.00816199	0.00444315	0.0051134	0.00590618	290
chr12:g.49579788A>T	INTRON3	TCCTCTC	TCCACTC	T	A	NM_006009.3:c.376-15T>A		0.000802124	0.000446898	0.000477455	0.000575492	4187
chr12:g.49579788A>G	INTRON3	TCCTCTC	TCCCCTC	T	C	NM_006009.3:c.376-15T>C		0.00307099	0.0018487	0.00209698	0.00233889	1585
chr12:g.49579788A>C	INTRON3	TCCTCTC	TCCGCTC	T	G	NM_006009.3:c.376-15T>G		0.000611142	0.000339948	0.000362865	0.000437985	4443
chr12:g.49579787G>T	INTRON3	CCTCTCT	CCTATCT	C	A	NM_006009.3:c.376-14C>A		0.000857525	0.000520987	0.000575998	0.000651503	3968
chr12:g.49579787G>C	INTRON3	CCTCTCT	CCTGTCT	C	G	NM_006009.3:c.376-14C>G		0.004718	0.00249168	0.00292206	0.00337725	1100
chr12:g.49579787G>A	INTRON3	CCTCTCT	CCTTTCT	C	T	NM_006009.3:c.376-14C>T		0.00611269	0.00317769	0.0038443	0.00437823	675
chr12:g.49579786A>T	INTRON3	CTCTCTT	CTCACTT	T	A	NM_006009.3:c.376-13T>A		0.000651493	0.000338438	0.000423048	0.000470993	4390
chr12:g.49579786A>G	INTRON3	CTCTCTT	CTCCCTT	T	C	NM_006009.3:c.376-13T>C		0.00362129	0.00214344	0.00248188	0.00274887	1422
chr12:g.49579786A>C	INTRON3	CTCTCTT	CTCGCTT	T	G	NM_006009.3:c.376-13T>G		0.000792509	0.00044279	0.000462532	0.000565944	4213
chr12:g.49579785G>T	INTRON3	TCTCTTT	TCTATTT	C	A	NM_006009.3:c.376-12C>A		0.00161743	0.000956343	0.00101948	0.00119775	2642
chr12:g.49579785G>C	INTRON3	TCTCTTT	TCTGTTT	C	G	NM_006009.3:c.376-12C>G		0.0036991	0.00201296	0.0023435	0.00268519	1450
chr12:g.49579785G>A	INTRON3	TCTCTTT	TCTTTTT	C	T	NM_006009.3:c.376-12C>T		0.00515868	0.00281332	0.00351154	0.00382785	865
chr12:g.49579784A>T	INTRON3	CTCTTTT	CTCATTT	T	A	NM_006009.3:c.376-11T>A		0.000673458	0.000430675	0.00045812	0.000520751	4303
chr12:g.49579784A>G	INTRON3	CTCTTTT	CTCCTTT	T	C	NM_006009.3:c.376-11T>C		0.00384863	0.0021956	0.00255027	0.00286483	1368
chr12:g.49579784A>C	INTRON3	CTCTTTT	CTCGTTT	T	G	NM_006009.3:c.376-11T>G		0.000855017	0.000462342	0.000519343	0.000612234	4089
chr12:g.49579783A>T	INTRON3	TCTTTTG	TCTATTG	T	A	NM_006009.3:c.376-10T>A		0.000448305	0.000274373	0.00030377	0.000342149	4523
chr12:g.49579783A>G	INTRON3	TCTTTTG	TCTCTTG	T	C	NM_006009.3:c.376-10T>C		0.00184712	0.00109014	0.00125428	0.00139718	2372
chr12:g.49579783A>C	INTRON3	TCTTTTG	TCTGTTG	T	G	NM_006009.3:c.376-10T>G		0.000930907	0.000556095	0.000656534	0.000714512	3774
chr12:g.49579782A>T	INTRON3	CTTTTGT	CTTATGT	T	A	NM_006009.3:c.376-9T>A		0.000490394	0.000288292	0.000279376	0.000352687	4520
chr12:g.49579782A>G	INTRON3	CTTTTGT	CTTCTGT	T	C	NM_006009.3:c.376-9T>C		0.00562319	0.00300181	0.00348031	0.0040351	783
chr12:g.49579782A>C	INTRON3	CTTTTGT	CTTGTGT	T	G	NM_006009.3:c.376-9T>G		0.000847045	0.000481478	0.00054092	0.000623148	4053
chr12:g.49579781A>T	INTRON3	TTTTGTT	TTTAGTT	T	A	NM_006009.3:c.376-8T>A		0.000773024	0.000413533	0.000503993	0.000563517	4222
chr12:g.49579781A>G	INTRON3	TTTTGTT	TTTCGTT	T	C	NM_006009.3:c.376-8T>C		0.00352443	0.00195841	0.00228265	0.0025885	1484
chr12:g.49579781A>C	INTRON3	TTTTGTT	TTTGGTT	T	G	NM_006009.3:c.376-8T>G		0.00206531	0.00119948	0.00132049	0.00152843	2202
chr12:g.49579780C>T	INTRON3	TTTGTTA	TTTATTA	G	A	NM_006009.3:c.376-7G>A		0.00623946	0.00347751	0.00408194	0.00459964	601
chr12:g.49579780C>G	INTRON3	TTTGTTA	TTTCTTA	G	C	NM_006009.3:c.376-7G>C		0.00266438	0.00135794	0.00165338	0.0018919	1864
chr12:g.49579780C>A	INTRON3	TTTGTTA	TTTTTTA	G	T	NM_006009.3:c.376-7G>T		0.00353985	0.00185666	0.00223612	0.00254421	1501
chr12:g.49579779A>T	INTRON3	TTGTTAT	TTGATAT	T	A	NM_006009.3:c.376-6T>A		0.000969483	0.000579043	0.00061544	0.000721322	3757
chr12:g.49579779A>G	INTRON3	TTGTTAT	TTGCTAT	T	C	NM_006009.3:c.376-6T>C		0.00523785	0.00292168	0.00332867	0.0038294	863
chr12:g.49579779A>C	INTRON3	TTGTTAT	TTGGTAT	T	G	NM_006009.3:c.376-6T>G		0.000956248	0.000555881	0.000605513	0.000705881	3808
chr12:g.49579778A>T	INTRON3	TGTTATA	TGTAATA	T	A	NM_006009.3:c.376-5T>A		0.000949382	0.000584235	0.000639007	0.000724208	3749
chr12:g.49579778A>G	INTRON3	TGTTATA	TGTCATA	T	C	NM_006009.3:c.376-5T>C		0.00361495	0.00209047	0.00233694	0.00268079	1452
chr12:g.49579778A>C	INTRON3	TGTTATA	TGTGATA	T	G	NM_006009.3:c.376-5T>G		0.000743986	0.000447305	0.00051577	0.00056902	4201
chr12:g.49579777T>G	INTRON3	GTTATAG	GTTCTAG	A	C	NM_006009.3:c.376-4A>C		0.000728231	0.000556882	0.000556882	0.000613998	4081
chr12:g.49579777T>C	INTRON3	GTTATAG	GTTGTAG	A	G	NM_006009.3:c.376-4A>G		0.00736798	0.00426229	0.00454073	0.00539034	398
chr12:g.49579777T>A	INTRON3	GTTATAG	GTTTTAG	A	T	NM_006009.3:c.376-4A>T		0.00156355	0.00101738	0.00102809	0.00120301	2633
chr12:g.49579776A>T	INTRON3	TTATAGG	TTAAAGG	T	A	NM_006009.3:c.376-3T>A		0.00117899	0.000659221	0.000728946	0.000855719	3389
chr12:g.49579776A>G	INTRON3	TTATAGG	TTACAGG	T	C	NM_006009.3:c.376-3T>C		0.0206577	0.0124808	0.013831	0.0156565	78
chr12:g.49579776A>C	INTRON3	TTATAGG	TTAGAGG	T	G	NM_006009.3:c.376-3T>G		0.0010332	0.000671898	0.000690914	0.000798671	3551
chr12:g.49579775T>G	INTRON3	TATAGGC	TATCGGC	A	C	NM_006009.3:c.376-2A>C		0.000577478	0.000307988	0.000327238	0.000404235	4476
chr12:g.49579775T>C	INTRON3	TATAGGC	TATGGGC	A	G	NM_006009.3:c.376-2A>G		0.00298364	0.00171319	0.00186718	0.002188	1667
chr12:g.49579775T>A	INTRON3	TATAGGC	TATTGGC	A	T	NM_006009.3:c.376-2A>T		0.000837344	0.00053898	0.000558229	0.000644851	3990
chr12:g.49579774C>T	INTRON3	ATAGGCC	ATAAGCC	G	A	NM_006009.3:c.376-1G>A		0.00711537	0.00373451	0.0041023	0.00498406	489
chr12:g.49579774C>G	INTRON3	ATAGGCC	ATACGCC	G	C	NM_006009.3:c.376-1G>C		0.00161263	0.000679002	0.00113167	0.0011411	2751
chr12:g.49579774C>A	INTRON3	ATAGGCC	ATATGCC	G	T	NM_006009.3:c.376-1G>T		0.00152775	0.000862898	0.000990211	0.00112695	2775
chr12:g.49579773C>T	EXON4	TAGGCCG	TAGACCG	G	A	NM_006009.3:c.376G>A	p.(Ala126Thr)	0.00375352	0.00206443	0.00243979	0.00275258	1415
chr12:g.49579773C>G	EXON4	TAGGCCG	TAGCCCG	G	C	NM_006009.3:c.376G>C	p.(Ala126Pro)	0.00131373	0.000500469	0.000875821	0.000896674	3269
chr12:g.49579773C>A	EXON4	TAGGCCG	TAGTCCG	G	T	NM_006009.3:c.376G>T	p.(Ala126Ser)	0.00237723	0.00175164	0.00206443	0.00206444	1741
chr12:g.49579772G>T	EXON4	AGGCCGA	AGGACGA	C	A	NM_006009.3:c.377C>A	p.(Ala126Asp)	0.00149169	0.000645527	0.000968291	0.00103517	2957
chr12:g.49579772G>C	EXON4	AGGCCGA	AGGGCGA	C	G	NM_006009.3:c.377C>G	p.(Ala126Gly)	0.00070659	0.000409997	0.000505954	0.000540847	4265
chr12:g.49579772G>A	EXON4	AGGCCGA	AGGTCGA	C	T	NM_006009.3:c.377C>T	p.(Ala126Val)	0.00438784	0.00244254	0.00274785	0.00319274	1184
chr12:g.49579771G>T	EXON4	GGCCGAC	GGCAGAC	C	A	NM_006009.3:c.378C>A	p.(=)	0.00680554	0.00390074	0.00473068	0.00514566	451
chr12:g.49579771G>C	EXON4	GGCCGAC	GGCGGAC	C	G	NM_006009.3:c.378C>G	p.(=)	0.00381774	0.00232384	0.00331978	0.00315379	1206
chr12:g.49579771G>A	EXON4	GGCCGAC	GGCTGAC	C	T	NM_006009.3:c.378C>T	p.(=)	0.07511	0.0405013	0.0483028	0.054638	51
chr12:g.49579770C>T	EXON4	GCCGACC	GCCAACC	G	A	NM_006009.3:c.379G>A	p.(Asp127Asn)	0.066659	0.0386529	0.0430506	0.0494542	57
chr12:g.49579770C>G	EXON4	GCCGACC	GCCCACC	G	C	NM_006009.3:c.379G>C	p.(Asp127His)	0.00578637	0.00324037	0.00393473	0.00432049	691
chr12:g.49579770C>A	EXON4	GCCGACC	GCCTACC	G	T	NM_006009.3:c.379G>T	p.(Asp127Tyr)	0.005092	0.00393473	0.00335609	0.00412761	751
chr12:g.49579769T>G	EXON4	CCGACCA	CCGCCCA	A	C	NM_006009.3:c.380A>C	p.(Asp127Ala)	0.00090068	0.00065504	0.00073692	0.000764213	3653
chr12:g.49579769T>C	EXON4	CCGACCA	CCGGCCA	A	G	NM_006009.3:c.380A>G	p.(Asp127Gly)	0.0073692	0.00524032	0.00548596	0.00603182	261
chr12:g.49579769T>A	EXON4	CCGACCA	CCGTCCA	A	T	NM_006009.3:c.380A>T	p.(Asp127Val)	0.00073692	0.00024564	0.00049128	0.00049128	4359
chr12:g.49579768G>T	EXON4	CGACCAG	CGAACAG	C	A	NM_006009.3:c.381C>A	p.(Asp127Glu)	0.00251237	0.00172725	0.00235534	0.00219832	1660
chr12:g.49579768G>C	EXON4	CGACCAG	CGAGCAG	C	G	NM_006009.3:c.381C>G	p.(Asp127Glu)	0.00149172	0.00141321	0.00149172	0.00146555	2275
chr12:g.49579768G>A	EXON4	CGACCAG	CGATCAG	C	T	NM_006009.3:c.381C>T	p.(=)	0.00565282	0.00337599	0.00337599	0.00413493	749
chr12:g.49579767G>T	EXON4	GACCAGT	GACAAGT	C	A	NM_006009.3:c.382C>A	p.(Gln128Lys)	0.00320943	0.00174736	0.00212773	0.00236151	1577
chr12:g.49579767G>C	EXON4	GACCAGT	GACGAGT	C	G	NM_006009.3:c.382C>G	p.(Gln128Glu)	0.00229415	0.0011649	0.00158094	0.00168	2043
chr12:g.49579767G>A	EXON4	GACCAGT	GACTAGT	C	T	NM_006009.3:c.382C>T	p.(Gln128*)	0.00489736	0.00260321	0.00317377	0.00355811	994
chr12:g.49579766T>G	EXON4	ACCAGTG	ACCCGTG	A	C	NM_006009.3:c.383A>C	p.(Gln128Pro)	0.00115314	0.000622195	0.000763226	0.000846185	3418
chr12:g.49579766T>C	EXON4	ACCAGTG	ACCGGTG	A	G	NM_006009.3:c.383A>G	p.(Gln128Arg)	0.00502733	0.00276255	0.003476	0.00375529	896
chr12:g.49579766T>A	EXON4	ACCAGTG	ACCTGTG	A	T	NM_006009.3:c.383A>T	p.(Gln128Leu)	0.00103699	0.000696858	0.000746634	0.000826828	3474
chr12:g.49579765C>T	EXON4	CCAGTGC	CCAATGC	G	A	NM_006009.3:c.384G>A	p.(=)	0.00807762	0.00530069	0.00592958	0.00643596	210
chr12:g.49579765C>G	EXON4	CCAGTGC	CCACTGC	G	C	NM_006009.3:c.384G>C	p.(Gln128His)	0.00312814	0.00184585	0.00214804	0.00237401	1573
chr12:g.49579765C>A	EXON4	CCAGTGC	CCATTGC	G	T	NM_006009.3:c.384G>T	p.(Gln128His)	0.00166616	0.000767742	0.00102093	0.00115161	2730
chr12:g.49579764A>T	EXON4	CAGTGCA	CAGAGCA	T	A	NM_006009.3:c.385T>A	p.(Cys129Ser)	0.00150968	0.000851933	0.000883254	0.00108162	2852
chr12:g.49579764A>G	EXON4	CAGTGCA	CAGCGCA	T	C	NM_006009.3:c.385T>C	p.(Cys129Arg)	0.00604497	0.00369588	0.00421582	0.00465222	590
chr12:g.49579764A>C	EXON4	CAGTGCA	CAGGGCA	T	G	NM_006009.3:c.385T>G	p.(Cys129Gly)	0.00247436	0.00144077	0.00158485	0.00183333	1909
chr12:g.49579763C>T	EXON4	AGTGCAC	AGTACAC	G	A	NM_006009.3:c.386G>A	p.(Cys129Tyr)	0.00760407	0.00393678	0.00496784	0.0055029	378
chr12:g.49579763C>G	EXON4	AGTGCAC	AGTCCAC	G	C	NM_006009.3:c.386G>C	p.(Cys129Ser)	0.000913895	0.000421798	0.000632696	0.00065613	3953
chr12:g.49579763C>A	EXON4	AGTGCAC	AGTTCAC	G	T	NM_006009.3:c.386G>T	p.(Cys129Phe)	0.00208555	0.000949045	0.00125368	0.00142943	2320
chr12:g.49579762G>T	EXON4	GTGCACG	GTGAACG	C	A	NM_006009.3:c.387C>A	p.(Cys129*)	0.00153322	0.000715503	0.00088586	0.00104486	2939
chr12:g.49579762G>C	EXON4	GTGCACG	GTGGACG	C	G	NM_006009.3:c.387C>G	p.(Cys129Trp)	0.00109029	0.000647359	0.000749574	0.000829074	3467
chr12:g.49579762G>A	EXON4	GTGCACG	GTGTACG	C	T	NM_006009.3:c.387C>T	p.(=)	0.00623509	0.00303237	0.00415673	0.00447473	641
chr12:g.49579761T>G	EXON4	TGCACGG	TGCCCGG	A	C	NM_006009.3:c.388A>C	p.(Thr130Pro)	0.00237213	0.00158142	0.00182851	0.00192735	1837
chr12:g.49579761T>C	EXON4	TGCACGG	TGCGCGG	A	G	NM_006009.3:c.388A>G	p.(Thr130Ala)	0.006128	0.00370645	0.00454658	0.00479367	545
chr12:g.49579761T>A	EXON4	TGCACGG	TGCTCGG	A	T	NM_006009.3:c.388A>T	p.(Thr130Ser)	0.0012849	0.000938967	0.00108723	0.0011037	2821
chr12:g.49579760G>T	EXON4	GCACGGG	GCAAGGG	C	A	NM_006009.3:c.389C>A	p.(Thr130Lys)	0.00496447	0.00340699	0.00360167	0.00399104	801
chr12:g.49579760G>C	EXON4	GCACGGG	GCAGGGG	C	G	NM_006009.3:c.389C>G	p.(Thr130Arg)	0.00564587	0.00311496	0.00350433	0.00408839	765
chr12:g.49579760G>A	EXON4	GCACGGG	GCATGGG	C	T	NM_006009.3:c.389C>T	p.(Thr130Met)	0.103767	0.0575781	0.0690645	0.0768033	10
chr12:g.49579759C>T	EXON4	CACGGGT	CACAGGT	G	A	NM_006009.3:c.390G>A	p.(=)	0.0734701	0.0410895	0.0477526	0.0541041	53
chr12:g.49579759C>G	EXON4	CACGGGT	CACCGGT	G	C	NM_006009.3:c.390G>C	p.(=)	0.00356537	0.0022795	0.0026302	0.00282502	1384
chr12:g.49579759C>A	EXON4	CACGGGT	CACTGGT	G	T	NM_006009.3:c.390G>T	p.(=)	0.00549418	0.00298089	0.00385762	0.0041109	756
chr12:g.49579758C>T	EXON4	ACGGGTC	ACGAGTC	G	A	NM_006009.3:c.391G>A	p.(Gly131Ser)	0.00769389	0.00318014	0.00492409	0.00526604	428
chr12:g.49579758C>G	EXON4	ACGGGTC	ACGCGTC	G	C	NM_006009.3:c.391G>C	p.(Gly131Arg)	0.0020517	0.000923266	0.00194912	0.00164136	2076
chr12:g.49579758C>A	EXON4	ACGGGTC	ACGTGTC	G	T	NM_006009.3:c.391G>T	p.(Gly131Cys)	0.00461633	0.0027698	0.00400082	0.00379565	876
chr12:g.49579757C>T	EXON4	CGGGTCT	CGGATCT	G	A	NM_006009.3:c.392G>A	p.(Gly131Asp)	0.00770736	0.00409083	0.00551372	0.00577064	316
chr12:g.49579757C>G	EXON4	CGGGTCT	CGGCTCT	G	C	NM_006009.3:c.392G>C	p.(Gly131Ala)	0.00171933	0.00160076	0.00118575	0.00150195	2225
chr12:g.49579757C>A	EXON4	CGGGTCT	CGGTTCT	G	T	NM_006009.3:c.392G>T	p.(Gly131Val)	0.00361653	0.00231221	0.00290508	0.00294461	1328
chr12:g.49579756A>T	EXON4	GGGTCTC	GGGACTC	T	A	NM_006009.3:c.393T>A	p.(=)	0.00159254	0.000837012	0.00105923	0.00116293	2706
chr12:g.49579756A>G	EXON4	GGGTCTC	GGGCCTC	T	C	NM_006009.3:c.393T>C	p.(=)	0.00291843	0.00172587	0.00207401	0.00223944	1644
chr12:g.49579756A>C	EXON4	GGGTCTC	GGGGCTC	T	G	NM_006009.3:c.393T>G	p.(=)	0.000888863	0.000644425	0.00076294	0.000765409	3650
chr12:g.49579755G>T	EXON4	GGTCTCC	GGTATCC	C	A	NM_006009.3:c.394C>A	p.(Leu132Ile)	0.00227145	0.00107504	0.00143916	0.00159521	2125
chr12:g.49579755G>C	EXON4	GGTCTCC	GGTGTCC	C	G	NM_006009.3:c.394C>G	p.(Leu132Val)	0.00210672	0.0011704	0.00143049	0.00156921	2153
chr12:g.49579755G>A	EXON4	GGTCTCC	GGTTTCC	C	T	NM_006009.3:c.394C>T	p.(Leu132Phe)	0.00432615	0.00228012	0.00285231	0.00315286	1207
chr12:g.49579754A>T	EXON4	GTCTCCA	GTCACCA	T	A	NM_006009.3:c.395T>A	p.(Leu132His)	0.00078275	0.000411372	0.000508502	0.000567541	4210
chr12:g.49579754A>G	EXON4	GTCTCCA	GTCCCCA	T	C	NM_006009.3:c.395T>C	p.(Leu132Pro)	0.00265678	0.00163977	0.00184546	0.00204734	1751
chr12:g.49579754A>C	EXON4	GTCTCCA	GTCGCCA	T	G	NM_006009.3:c.395T>G	p.(Leu132Arg)	0.000777036	0.000411372	0.000508502	0.000565637	4218
chr12:g.49579753G>T	EXON4	TCTCCAG	TCTACAG	C	A	NM_006009.3:c.396C>A	p.(=)	0.00119363	0.000631692	0.000852591	0.000892637	3290
chr12:g.49579753G>C	EXON4	TCTCCAG	TCTGCAG	C	G	NM_006009.3:c.396C>G	p.(=)	0.00273604	0.00137577	0.00157729	0.00189637	1860
chr12:g.49579753G>A	EXON4	TCTCCAG	TCTTCAG	C	T	NM_006009.3:c.396C>T	p.(=)	0.00476676	0.00241826	0.00309646	0.00342716	1070
chr12:g.49579752G>T	EXON4	CTCCAGG	CTCAAGG	C	A	NM_006009.3:c.397C>A	p.(Gln133Lys)	0.000799054	0.000514645	0.000519159	0.000610953	4093
chr12:g.49579752G>C	EXON4	CTCCAGG	CTCGAGG	C	G	NM_006009.3:c.397C>G	p.(Gln133Glu)	0.000641049	0.000306981	0.000410813	0.000452948	4421
chr12:g.49579752G>A	EXON4	CTCCAGG	CTCTAGG	C	T	NM_006009.3:c.397C>T	p.(Gln133*)	0.00542634	0.00289375	0.00321427	0.00384479	857
chr12:g.49579751T>G	EXON4	TCCAGGG	TCCCGGG	A	C	NM_006009.3:c.398A>C	p.(Gln133Pro)	0.00125464	0.000722719	0.000780536	0.000919298	3198
chr12:g.49579751T>C	EXON4	TCCAGGG	TCCGGGG	A	G	NM_006009.3:c.398A>G	p.(Gln133Arg)	0.00559673	0.00308745	0.00373501	0.00413973	745
chr12:g.49579751T>A	EXON4	TCCAGGG	TCCTGGG	A	T	NM_006009.3:c.398A>T	p.(Gln133Leu)	0.00116791	0.000757409	0.000780536	0.000901953	3246
chr12:g.49579750C>T	EXON4	CCAGGGC	CCAAGGC	G	A	NM_006009.3:c.399G>A	p.(=)	0.00447998	0.00241319	0.00279999	0.00323105	1168
chr12:g.49579750C>G	EXON4	CCAGGGC	CCACGGC	G	C	NM_006009.3:c.399G>C	p.(Gln133His)	0.00202638	0.0010969	0.00117195	0.00143175	2316
chr12:g.49579750C>A	EXON4	CCAGGGC	CCATGGC	G	T	NM_006009.3:c.399G>T	p.(Gln133His)	0.000912161	0.000531132	0.000692781	0.000712025	3784
chr12:g.49579749C>T	EXON4	CAGGGCT	CAGAGCT	G	A	NM_006009.3:c.400G>A	p.(Gly134Ser)	0.00666454	0.00349482	0.00421004	0.0047898	550
chr12:g.49579749C>G	EXON4	CAGGGCT	CAGCGCT	G	C	NM_006009.3:c.400G>C	p.(Gly134Arg)	0.00140335	0.00067729	0.000866931	0.000982522	3049
chr12:g.49579749C>A	EXON4	CAGGGCT	CAGTGCT	G	T	NM_006009.3:c.400G>T	p.(Gly134Cys)	0.00216733	0.00118119	0.00143044	0.00159299	2128
chr12:g.49579748C>T	EXON4	AGGGCTT	AGGACTT	G	A	NM_006009.3:c.401G>A	p.(Gly134Asp)	0.00688208	0.00334918	0.00416175	0.00479767	543
chr12:g.49579748C>G	EXON4	AGGGCTT	AGGCCTT	G	C	NM_006009.3:c.401G>C	p.(Gly134Ala)	0.00238824	0.00131424	0.00159687	0.00176645	1956
chr12:g.49579748C>A	EXON4	AGGGCTT	AGGTCTT	G	T	NM_006009.3:c.401G>T	p.(Gly134Val)	0.00344104	0.00187243	0.00222572	0.00251307	1515
chr12:g.49579747G>T	EXON4	GGGCTTC	GGGATTC	C	A	NM_006009.3:c.402C>A	p.(=)	0.00182091	0.00109087	0.00123352	0.00138177	2387
chr12:g.49579747G>C	EXON4	GGGCTTC	GGGGTTC	C	G	NM_006009.3:c.402C>G	p.(=)	0.00083913	0.000411174	0.000520261	0.000590188	4153
chr12:g.49579747G>A	EXON4	GGGCTTC	GGGTTTC	C	T	NM_006009.3:c.402C>T	p.(=)	0.00716617	0.00467396	0.0049173	0.00558581	360
chr12:g.49579746A>T	EXON4	GGCTTCT	GGCATCT	T	A	NM_006009.3:c.403T>A	p.(Phe135Ile)	0.00067797	0.000515721	0.000486748	0.000560146	4232
chr12:g.49579746A>G	EXON4	GGCTTCT	GGCCTCT	T	C	NM_006009.3:c.403T>C	p.(Phe135Leu)	0.00286834	0.00180212	0.00208606	0.00225217	1633
chr12:g.49579746A>C	EXON4	GGCTTCT	GGCGTCT	T	G	NM_006009.3:c.403T>G	p.(Phe135Val)	0.00108359	0.000515721	0.000718532	0.000772615	3635
chr12:g.49579745A>T	EXON4	GCTTCTT	GCTACTT	T	A	NM_006009.3:c.404T>A	p.(Phe135Tyr)	0.000753171	0.000452887	0.000447965	0.000551341	4243
chr12:g.49579745A>G	EXON4	GCTTCTT	GCTCCTT	T	C	NM_006009.3:c.404T>C	p.(Phe135Ser)	0.00240719	0.00150634	0.00162941	0.00184765	1894
chr12:g.49579745A>C	EXON4	GCTTCTT	GCTGCTT	T	G	NM_006009.3:c.404T>G	p.(Phe135Cys)	0.00466671	0.00263364	0.00298807	0.00342947	1067
chr12:g.49579744G>T	EXON4	CTTCTTG	CTTATTG	C	A	NM_006009.3:c.405C>A	p.(Phe135Leu)	0.00141856	0.000806103	0.000918687	0.00104778	2932
chr12:g.49579744G>C	EXON4	CTTCTTG	CTTGTTG	C	G	NM_006009.3:c.405C>G	p.(Phe135Leu)	0.00185539	0.00109432	0.00135551	0.00143507	2310
chr12:g.49579744G>A	EXON4	CTTCTTG	CTTTTTG	C	T	NM_006009.3:c.405C>T	p.(=)	0.00406654	0.0022697	0.00284613	0.00306079	1256
chr12:g.49579743A>T	EXON4	TTCTTGG	TTCATGG	T	A	NM_006009.3:c.406T>A	p.(Leu136Met)	0.000709989	0.00046472	0.000425993	0.000533567	4284
chr12:g.49579743A>G	EXON4	TTCTTGG	TTCCTGG	T	C	NM_006009.3:c.406T>C	p.(=)	0.00476768	0.00274099	0.00317128	0.00355998	993
chr12:g.49579743A>C	EXON4	TTCTTGG	TTCGTGG	T	G	NM_006009.3:c.406T>G	p.(Leu136Val)	0.000864896	0.000477629	0.000628233	0.000656919	3947
chr12:g.49579742A>T	EXON4	TCTTGGT	TCTAGGT	T	A	NM_006009.3:c.407T>A	p.(Leu136*)	0.000564456	0.000256571	0.000342095	0.000387707	4503
chr12:g.49579742A>G	EXON4	TCTTGGT	TCTCGGT	T	C	NM_006009.3:c.407T>C	p.(Leu136Ser)	0.00441872	0.00247448	0.00286789	0.0032537	1156
chr12:g.49579742A>C	EXON4	TCTTGGT	TCTGGGT	T	G	NM_006009.3:c.407T>G	p.(Leu136Trp)	0.00117453	0.000746907	0.000843834	0.000921755	3189
chr12:g.49579741C>T	EXON4	CTTGGTT	CTTAGTT	G	A	NM_006009.3:c.408G>A	p.(=)	0.00464976	0.00253515	0.00268324	0.00328938	1137
chr12:g.49579741C>G	EXON4	CTTGGTT	CTTCGTT	G	C	NM_006009.3:c.408G>C	p.(Leu136Phe)	0.00344734	0.00187767	0.00222714	0.00251738	1513
chr12:g.49579741C>A	EXON4	CTTGGTT	CTTTGTT	G	T	NM_006009.3:c.408G>T	p.(Leu136Phe)	0.00440098	0.0023693	0.0029024	0.00322423	1173
chr12:g.49579740C>T	EXON4	TTGGTTT	TTGATTT	G	A	NM_006009.3:c.409G>A	p.(Val137Ile)	0.00632543	0.00313468	0.00412939	0.00452983	621
chr12:g.49579740C>G	EXON4	TTGGTTT	TTGCTTT	G	C	NM_006009.3:c.409G>C	p.(Val137Leu)	0.00226098	0.00124265	0.00137843	0.00162736	2082
chr12:g.49579740C>A	EXON4	TTGGTTT	TTGTTTT	G	T	NM_006009.3:c.409G>T	p.(Val137Phe)	0.00614833	0.00384013	0.00439504	0.0047945	544
chr12:g.49579739A>T	EXON4	TGGTTTT	TGGATTT	T	A	NM_006009.3:c.410T>A	p.(Val137Asp)	0.00115705	0.000645368	0.00079749	0.000866637	3360
chr12:g.49579739A>G	EXON4	TGGTTTT	TGGCTTT	T	C	NM_006009.3:c.410T>C	p.(Val137Ala)	0.00387912	0.00224265	0.00248928	0.00287035	1366
chr12:g.49579739A>C	EXON4	TGGTTTT	TGGGTTT	T	G	NM_006009.3:c.410T>G	p.(Val137Gly)	0.00249389	0.00139907	0.00173558	0.00187618	1875
chr12:g.49579738A>T	EXON4	GGTTTTC	GGTATTC	T	A	NM_006009.3:c.411T>A	p.(=)	0.000626504	0.000342549	0.000392129	0.000453727	4420
chr12:g.49579738A>G	EXON4	GGTTTTC	GGTCTTC	T	C	NM_006009.3:c.411T>C	p.(=)	0.00138372	0.000829329	0.000982575	0.00106521	2884
chr12:g.49579738A>C	EXON4	GGTTTTC	GGTGTTC	T	G	NM_006009.3:c.411T>G	p.(=)	0.000851866	0.000477766	0.000540867	0.0006235	4048
chr12:g.49579737A>T	EXON4	GTTTTCC	GTTATCC	T	A	NM_006009.3:c.412T>A	p.(Phe138Ile)	0.000416315	0.000284215	0.000256194	0.000318908	4534
chr12:g.49579737A>G	EXON4	GTTTTCC	GTTCTCC	T	C	NM_006009.3:c.412T>C	p.(Phe138Leu)	0.00195748	0.0010528	0.00122893	0.00141307	2348
chr12:g.49579737A>C	EXON4	GTTTTCC	GTTGTCC	T	G	NM_006009.3:c.412T>G	p.(Phe138Val)	0.000848642	0.000392297	0.000484366	0.000575102	4188
chr12:g.49579736A>T	EXON4	TTTTCCA	TTTACCA	T	A	NM_006009.3:c.413T>A	p.(Phe138Tyr)	0.000548981	0.000330636	0.000347272	0.000408963	4469
chr12:g.49579736A>G	EXON4	TTTTCCA	TTTCCCA	T	C	NM_006009.3:c.413T>C	p.(Phe138Ser)	0.00439393	0.00245378	0.0029175	0.00325507	1155
chr12:g.49579736A>C	EXON4	TTTTCCA	TTTGCCA	T	G	NM_006009.3:c.413T>G	p.(Phe138Cys)	0.00101686	0.000625921	0.000744451	0.000795745	3553
chr12:g.49579735G>T	EXON4	TTTCCAC	TTTACAC	C	A	NM_006009.3:c.414C>A	p.(Phe138Leu)	0.00129853	0.000653652	0.000737004	0.000896395	3270
chr12:g.49579735G>C	EXON4	TTTCCAC	TTTGCAC	C	G	NM_006009.3:c.414C>G	p.(Phe138Leu)	0.00128976	0.000666813	0.000881772	0.000946114	3122
chr12:g.49579735G>A	EXON4	TTTCCAC	TTTTCAC	C	T	NM_006009.3:c.414C>T	p.(=)	0.00426409	0.00234701	0.00320246	0.00327119	1143
chr12:g.49579734G>T	EXON4	TTCCACA	TTCAACA	C	A	NM_006009.3:c.415C>A	p.(His139Asn)	0.000919029	0.000580642	0.000707537	0.000735736	3722
chr12:g.49579734G>C	EXON4	TTCCACA	TTCGACA	C	G	NM_006009.3:c.415C>G	p.(His139Asp)	0.000496045	0.000219183	0.000323006	0.000346078	4521
chr12:g.49579734G>A	EXON4	TTCCACA	TTCTACA	C	T	NM_006009.3:c.415C>T	p.(His139Tyr)	0.00584103	0.00297627	0.00353769	0.00411833	754
chr12:g.49579733T>G	EXON4	TCCACAG	TCCCCAG	A	C	NM_006009.3:c.416A>C	p.(His139Pro)	0.00101269	0.000685845	0.000680487	0.000793008	3559
chr12:g.49579733T>C	EXON4	TCCACAG	TCCGCAG	A	G	NM_006009.3:c.416A>G	p.(His139Arg)	0.00522421	0.00297378	0.00372393	0.00397397	808
chr12:g.49579733T>A	EXON4	TCCACAG	TCCTCAG	A	T	NM_006009.3:c.416A>T	p.(His139Leu)	0.000910888	0.000487593	0.000535817	0.000644766	3991
chr12:g.49579732G>T	EXON4	CCACAGC	CCAAAGC	C	A	NM_006009.3:c.417C>A	p.(His139Gln)	0.00135649	0.000715628	0.000865163	0.000979094	3057
chr12:g.49579732G>C	EXON4	CCACAGC	CCAGAGC	C	G	NM_006009.3:c.417C>G	p.(His139Gln)	0.00200269	0.00113219	0.00136183	0.0014989	2227
chr12:g.49579732G>A	EXON4	CCACAGC	CCATAGC	C	T	NM_006009.3:c.417C>T	p.(=)	0.0079894	0.00431513	0.00491861	0.00574105	323
chr12:g.49579731T>G	EXON4	CACAGCT	CACCGCT	A	C	NM_006009.3:c.418A>C	p.(Ser140Arg)	0.000971457	0.000499475	0.000655275	0.000708736	3787
chr12:g.49579731T>C	EXON4	CACAGCT	CACGGCT	A	G	NM_006009.3:c.418A>G	p.(Ser140Gly)	0.00365213	0.0022316	0.00250654	0.00279676	1394
chr12:g.49579731T>A	EXON4	CACAGCT	CACTGCT	A	T	NM_006009.3:c.418A>T	p.(Ser140Cys)	0.00105394	0.000604869	0.000673604	0.000777471	3618
chr12:g.49579730C>T	EXON4	ACAGCTT	ACAACTT	G	A	NM_006009.3:c.419G>A	p.(Ser140Asn)	0.00601936	0.00329493	0.00387125	0.00439518	666
chr12:g.49579730C>G	EXON4	ACAGCTT	ACACCTT	G	C	NM_006009.3:c.419G>C	p.(Ser140Thr)	0.00222379	0.00123414	0.00134475	0.00160089	2121
chr12:g.49579730C>A	EXON4	ACAGCTT	ACATCTT	G	T	NM_006009.3:c.419G>T	p.(Ser140Ile)	0.00196182	0.00109443	0.00114682	0.00140102	2362
chr12:g.49579729G>T	EXON4	CAGCTTT	CAGATTT	C	A	NM_006009.3:c.420C>A	p.(Ser140Arg)	0.00265295	0.00143476	0.00160492	0.00189754	1856
chr12:g.49579729G>C	EXON4	CAGCTTT	CAGGTTT	C	G	NM_006009.3:c.420C>G	p.(Ser140Arg)	0.00279991	0.00147343	0.00175188	0.0020084	1777
chr12:g.49579729G>A	EXON4	CAGCTTT	CAGTTTT	C	T	NM_006009.3:c.420C>T	p.(=)	0.00529817	0.00279217	0.00340707	0.00383247	861
chr12:g.49579728A>T	EXON4	AGCTTTG	AGCATTG	T	A	NM_006009.3:c.421T>A	p.(Phe141Ile)	0.000798628	0.00048805	0.000527489	0.000604722	4112
chr12:g.49579728A>G	EXON4	AGCTTTG	AGCCTTG	T	C	NM_006009.3:c.421T>C	p.(Phe141Leu)	0.0021001	0.00126696	0.00137048	0.00157918	2141
chr12:g.49579728A>C	EXON4	AGCTTTG	AGCGTTG	T	G	NM_006009.3:c.421T>G	p.(Phe141Val)	0.000872575	0.000354946	0.000591576	0.000606366	4109
chr12:g.49579727A>T	EXON4	GCTTTGG	GCTATGG	T	A	NM_006009.3:c.422T>A	p.(Phe141Tyr)	0.00054128	0.00028519	0.000337572	0.000388014	4501
chr12:g.49579727A>G	EXON4	GCTTTGG	GCTCTGG	T	C	NM_006009.3:c.422T>C	p.(Phe141Ser)	0.00285191	0.00154236	0.00181009	0.00206812	1736
chr12:g.49579727A>C	EXON4	GCTTTGG	GCTGTGG	T	G	NM_006009.3:c.422T>G	p.(Phe141Cys)	0.00133283	0.000744987	0.000902133	0.000993316	3028
chr12:g.49579726A>T	EXON4	CTTTGGT	CTTAGGT	T	A	NM_006009.3:c.423T>A	p.(Phe141Leu)	0.000485352	0.000299112	0.000321687	0.000368717	4513
chr12:g.49579726A>G	EXON4	CTTTGGT	CTTCGGT	T	C	NM_006009.3:c.423T>C	p.(=)	0.00569442	0.00315479	0.0036345	0.00416123	736
chr12:g.49579726A>C	EXON4	CTTTGGT	CTTGGGT	T	G	NM_006009.3:c.423T>G	p.(Phe141Leu)	0.000784464	0.000536145	0.000479708	0.000600106	4124
chr12:g.49579725C>T	EXON4	TTTGGTG	TTTAGTG	G	A	NM_006009.3:c.424G>A	p.(Gly142Ser)	0.00406808	0.00216719	0.00252993	0.00292173	1337
chr12:g.49579725C>G	EXON4	TTTGGTG	TTTCGTG	G	C	NM_006009.3:c.424G>C	p.(Gly142Arg)	0.00180447	0.000927486	0.00115247	0.00129481	2494
chr12:g.49579725C>A	EXON4	TTTGGTG	TTTTGTG	G	T	NM_006009.3:c.424G>T	p.(Gly142Cys)	0.0026539	0.00127644	0.00159326	0.0018412	1900
chr12:g.49579724C>T	EXON4	TTGGTGG	TTGATGG	G	A	NM_006009.3:c.425G>A	p.(Gly142Asp)	0.00744763	0.00364665	0.0048241	0.00530613	416
chr12:g.49579724C>G	EXON4	TTGGTGG	TTGCTGG	G	C	NM_006009.3:c.425G>C	p.(Gly142Ala)	0.00206339	0.00112029	0.00115458	0.00144609	2303
chr12:g.49579724C>A	EXON4	TTGGTGG	TTGTTGG	G	T	NM_006009.3:c.425G>T	p.(Gly142Val)	0.00316653	0.00192049	0.00223486	0.00244063	1543
chr12:g.49579723A>T	EXON4	TGGTGGG	TGGAGGG	T	A	NM_006009.3:c.426T>A	p.(=)	0.000939737	0.000570708	0.000574999	0.000695148	3831
chr12:g.49579723A>G	EXON4	TGGTGGG	TGGCGGG	T	C	NM_006009.3:c.426T>C	p.(=)	0.00715745	0.00494327	0.00554402	0.00588158	294
chr12:g.49579723A>C	EXON4	TGGTGGG	TGGGGGG	T	G	NM_006009.3:c.426T>G	p.(=)	0.00157481	0.0010556	0.00118862	0.00127301	2519
chr12:g.49579722C>T	EXON4	GGTGGGG	GGTAGGG	G	A	NM_006009.3:c.427G>A	p.(Gly143Arg)	0.00923954	0.00466065	0.00557643	0.00649221	199
chr12:g.49579722C>G	EXON4	GGTGGGG	GGTCGGG	G	C	NM_006009.3:c.427G>C	p.(Gly143Arg)	0.0050613	0.0027923	0.00354455	0.00379939	874
chr12:g.49579722C>A	EXON4	GGTGGGG	GGTTGGG	G	T	NM_006009.3:c.427G>T	p.(Gly143Trp)	0.00605885	0.00329925	0.004121	0.00449303	637
chr12:g.49579721C>T	EXON4	GTGGGGG	GTGAGGG	G	A	NM_006009.3:c.428G>A	p.(Gly143Glu)	0.00755804	0.00391854	0.00504067	0.00550575	377
chr12:g.49579721C>G	EXON4	GTGGGGG	GTGCGGG	G	C	NM_006009.3:c.428G>C	p.(Gly143Ala)	0.00346138	0.00194146	0.00235706	0.00258663	1485
chr12:g.49579721C>A	EXON4	GTGGGGG	GTGTGGG	G	T	NM_006009.3:c.428G>T	p.(Gly143Val)	0.00350888	0.00227988	0.00252924	0.00277267	1407
chr12:g.49579720C>T	EXON4	TGGGGGA	TGGAGGA	G	A	NM_006009.3:c.429G>A	p.(=)	0.0080269	0.00418817	0.00510481	0.00577329	314
chr12:g.49579720C>G	EXON4	TGGGGGA	TGGCGGA	G	C	NM_006009.3:c.429G>C	p.(=)	0.00214726	0.00109895	0.00116479	0.00147033	2269
chr12:g.49579720C>A	EXON4	TGGGGGA	TGGTGGA	G	T	NM_006009.3:c.429G>T	p.(=)	0.00161045	0.000901444	0.00103818	0.00118336	2664
chr12:g.49579719C>T	EXON4	GGGGGAA	GGGAGAA	G	A	NM_006009.3:c.430G>A	p.(Gly144Arg)	0.00967447	0.00478857	0.00583323	0.00676542	183
chr12:g.49579719C>G	EXON4	GGGGGAA	GGGCGAA	G	C	NM_006009.3:c.430G>C	p.(Gly144Arg)	0.00115497	0.000519086	0.000661835	0.000778629	3612
chr12:g.49579719C>A	EXON4	GGGGGAA	GGGTGAA	G	T	NM_006009.3:c.430G>T	p.(Gly144*)	0.00178436	0.000973287	0.00114199	0.00129988	2481
chr12:g.49579718C>T	EXON4	GGGGAAC	GGGAAAC	G	A	NM_006009.3:c.431G>A	p.(Gly144Glu)	0.00840447	0.00410073	0.0060902	0.00619847	240
chr12:g.49579718C>G	EXON4	GGGGAAC	GGGCAAC	G	C	NM_006009.3:c.431G>C	p.(Gly144Ala)	0.00217217	0.00114699	0.00136014	0.00155977	2161
chr12:g.49579718C>A	EXON4	GGGGAAC	GGGTAAC	G	T	NM_006009.3:c.431G>T	p.(Gly144Val)	0.00253758	0.00144135	0.00178646	0.0019218	1840
chr12:g.49579717T>G	EXON4	GGGAACT	GGGCACT	A	C	NM_006009.3:c.432A>C	p.(=)	0.000788253	0.000390063	0.000528211	0.000568842	4202
chr12:g.49579717T>C	EXON4	GGGAACT	GGGGACT	A	G	NM_006009.3:c.432A>G	p.(=)	0.00220223	0.00158463	0.00160088	0.00179592	1935
chr12:g.49579717T>A	EXON4	GGGAACT	GGGTACT	A	T	NM_006009.3:c.432A>T	p.(=)	0.00122707	0.000585095	0.000633853	0.000815341	3510
chr12:g.49579716T>G	EXON4	GGAACTG	GGACCTG	A	C	NM_006009.3:c.433A>C	p.(Thr145Pro)	0.00109481	0.000696699	0.000833551	0.000875021	3344
chr12:g.49579716T>C	EXON4	GGAACTG	GGAGCTG	A	G	NM_006009.3:c.433A>G	p.(Thr145Ala)	0.00437303	0.00259396	0.0030294	0.00333213	1116
chr12:g.49579716T>A	EXON4	GGAACTG	GGATCTG	A	T	NM_006009.3:c.433A>T	p.(Thr145Ser)	0.00110103	0.000640715	0.00070292	0.00081489	3511
chr12:g.49579715G>T	EXON4	GAACTGG	GAAATGG	C	A	NM_006009.3:c.434C>A	p.(Thr145Asn)	0.00289288	0.00153366	0.00167177	0.00203277	1765
chr12:g.49579715G>C	EXON4	GAACTGG	GAAGTGG	C	G	NM_006009.3:c.434C>G	p.(Thr145Ser)	0.00301645	0.00146098	0.00165723	0.00204489	1753
chr12:g.49579715G>A	EXON4	GAACTGG	GAATTGG	C	T	NM_006009.3:c.434C>T	p.(Thr145Ile)	0.00702869	0.00417215	0.00511706	0.0054393	390
chr12:g.49579714A>T	EXON4	AACTGGT	AACAGGT	T	A	NM_006009.3:c.435T>A	p.(=)	0.00162347	0.000843882	0.00098051	0.00114929	2733
chr12:g.49579714A>G	EXON4	AACTGGT	AACCGGT	T	C	NM_006009.3:c.435T>C	p.(=)	0.0051517	0.00290135	0.00348804	0.00384703	855
chr12:g.49579714A>C	EXON4	AACTGGT	AACGGGT	T	G	NM_006009.3:c.435T>G	p.(=)	0.00126984	0.000707253	0.000884067	0.00095372	3110
chr12:g.49579713C>T	EXON4	ACTGGTT	ACTAGTT	G	A	NM_006009.3:c.436G>A	p.(Gly146Ser)	0.00584027	0.0030588	0.00338507	0.00409472	761
chr12:g.49579713C>G	EXON4	ACTGGTT	ACTCGTT	G	C	NM_006009.3:c.436G>C	p.(Gly146Arg)	0.0023981	0.00111748	0.00137034	0.00162864	2081
chr12:g.49579713C>A	EXON4	ACTGGTT	ACTTGTT	G	T	NM_006009.3:c.436G>T	p.(Gly146Cys)	0.00401315	0.00216971	0.00252045	0.0029011	1350
chr12:g.49579712C>T	EXON4	CTGGTTC	CTGATTC	G	A	NM_006009.3:c.437G>A	p.(Gly146Asp)	0.00650212	0.00325835	0.00431531	0.00469193	579
chr12:g.49579712C>G	EXON4	CTGGTTC	CTGCTTC	G	C	NM_006009.3:c.437G>C	p.(Gly146Ala)	0.0028137	0.00151619	0.00161095	0.00198028	1794
chr12:g.49579712C>A	EXON4	CTGGTTC	CTGTTTC	G	T	NM_006009.3:c.437G>T	p.(Gly146Val)	0.0036374	0.00190982	0.00213579	0.002561	1489
chr12:g.49579711A>T	EXON4	TGGTTCT	TGGATCT	T	A	NM_006009.3:c.438T>A	p.(=)	0.000944645	0.000591701	0.00072665	0.000754332	3669
chr12:g.49579711A>G	EXON4	TGGTTCT	TGGCTCT	T	C	NM_006009.3:c.438T>C	p.(=)	0.00447928	0.00253289	0.00276127	0.00325781	1151
chr12:g.49579711A>C	EXON4	TGGTTCT	TGGGTCT	T	G	NM_006009.3:c.438T>G	p.(=)	0.00114188	0.00072665	0.000773363	0.00088063	3330
chr12:g.49579710A>T	EXON4	GGTTCTG	GGTACTG	T	A	NM_006009.3:c.439T>A	p.(Ser147Thr)	0.000699582	0.000334906	0.000453984	0.000496157	4356
chr12:g.49579710A>G	EXON4	GGTTCTG	GGTCCTG	T	C	NM_006009.3:c.439T>C	p.(Ser147Pro)	0.00256761	0.00146615	0.00176384	0.00193253	1834
chr12:g.49579710A>C	EXON4	GGTTCTG	GGTGCTG	T	G	NM_006009.3:c.439T>G	p.(Ser147Ala)	0.00111635	0.000796332	0.000833544	0.00091541	3211
chr12:g.49579709G>T	EXON4	GTTCTGG	GTTATGG	C	A	NM_006009.3:c.440C>A	p.(Ser147Tyr)	0.00126734	0.000720645	0.000664733	0.00088424	3322
chr12:g.49579709G>C	EXON4	GTTCTGG	GTTGTGG	C	G	NM_006009.3:c.440C>G	p.(Ser147Cys)	0.00201905	0.000869743	0.00123007	0.00137295	2396
chr12:g.49579709G>A	EXON4	GTTCTGG	GTTTTGG	C	T	NM_006009.3:c.440C>T	p.(Ser147Phe)	0.0038393	0.00221785	0.00258438	0.00288051	1360
chr12:g.49579708A>T	EXON4	TTCTGGG	TTCAGGG	T	A	NM_006009.3:c.441T>A	p.(=)	0.000616653	0.000343014	0.00035843	0.000439366	4437
chr12:g.49579708A>G	EXON4	TTCTGGG	TTCCGGG	T	C	NM_006009.3:c.441T>C	p.(=)	0.00486	0.00282119	0.00325285	0.00364468	950
chr12:g.49579708A>C	EXON4	TTCTGGG	TTCGGGG	T	G	NM_006009.3:c.441T>G	p.(=)	0.000782379	0.000435512	0.000585821	0.000601237	4119
chr12:g.49579707C>T	EXON4	TCTGGGT	TCTAGGT	G	A	NM_006009.3:c.442G>A	p.(Gly148Arg)	0.00461154	0.00223832	0.00285286	0.00323424	1165
chr12:g.49579707C>G	EXON4	TCTGGGT	TCTCGGT	G	C	NM_006009.3:c.442G>C	p.(Gly148Arg)	0.00184362	0.000854359	0.000989258	0.00122908	2599
chr12:g.49579707C>A	EXON4	TCTGGGT	TCTTGGT	G	T	NM_006009.3:c.442G>T	p.(Gly148Trp)	0.00170872	0.000869348	0.00107919	0.00121909	2608
chr12:g.49579706C>T	EXON4	CTGGGTT	CTGAGTT	G	A	NM_006009.3:c.443G>A	p.(Gly148Glu)	0.00556836	0.00272036	0.00360189	0.00396354	811
chr12:g.49579706C>G	EXON4	CTGGGTT	CTGCGTT	G	C	NM_006009.3:c.443G>C	p.(Gly148Ala)	0.00262463	0.00136018	0.00154765	0.00184416	1896
chr12:g.49579706C>A	EXON4	CTGGGTT	CTGTGTT	G	T	NM_006009.3:c.443G>T	p.(Gly148Val)	0.00346627	0.0018508	0.00219783	0.00250497	1517
chr12:g.49579705C>T	EXON4	TGGGTTC	TGGATTC	G	A	NM_006009.3:c.444G>A	p.(=)	0.0078554	0.00381563	0.00525731	0.00564278	343
chr12:g.49579705C>G	EXON4	TGGGTTC	TGGCTTC	G	C	NM_006009.3:c.444G>C	p.(=)	0.00170149	0.000906785	0.00109527	0.00123452	2588
chr12:g.49579705C>A	EXON4	TGGGTTC	TGGTTTC	G	T	NM_006009.3:c.444G>T	p.(=)	0.00318394	0.00173206	0.00198168	0.00229923	1607
chr12:g.49579704A>T	EXON4	GGGTTCA	GGGATCA	T	A	NM_006009.3:c.445T>A	p.(Phe149Ile)	0.000938396	0.000607975	0.000682871	0.000743081	3708
chr12:g.49579704A>G	EXON4	GGGTTCA	GGGCTCA	T	C	NM_006009.3:c.445T>C	p.(Phe149Leu)	0.00309274	0.00190763	0.00221162	0.002404	1555
chr12:g.49579704A>C	EXON4	GGGTTCA	GGGGTCA	T	G	NM_006009.3:c.445T>G	p.(Phe149Val)	0.000876718	0.000630003	0.000682871	0.000729864	3735
chr12:g.49579703A>T	EXON4	GGTTCAC	GGTACAC	T	A	NM_006009.3:c.446T>A	p.(Phe149Tyr)	0.000663124	0.000304679	0.000349484	0.000439096	4440
chr12:g.49579703A>G	EXON4	GGTTCAC	GGTCCAC	T	C	NM_006009.3:c.446T>C	p.(Phe149Ser)	0.00147859	0.000922997	0.00109326	0.00116495	2698
chr12:g.49579703A>C	EXON4	GGTTCAC	GGTGCAC	T	G	NM_006009.3:c.446T>G	p.(Phe149Cys)	0.000519746	0.000403251	0.000430135	0.000451044	4426
chr12:g.49579702G>T	EXON4	GTTCACC	GTTAACC	C	A	NM_006009.3:c.447C>A	p.(Phe149Leu)	0.00102507	0.000571111	0.000732193	0.000776125	3627
chr12:g.49579702G>C	EXON4	GTTCACC	GTTGACC	C	G	NM_006009.3:c.447C>G	p.(Phe149Leu)	0.001069	0.000629686	0.00064433	0.000781006	3600
chr12:g.49579702G>A	EXON4	GTTCACC	GTTTACC	C	T	NM_006009.3:c.447C>T	p.(=)	0.00458353	0.00267983	0.00292877	0.00339738	1088
chr12:g.49579701T>G	EXON4	TTCACCT	TTCCCCT	A	C	NM_006009.3:c.448A>C	p.(Thr150Pro)	0.00133836	0.000846611	0.00101391	0.00106629	2882
chr12:g.49579701T>C	EXON4	TTCACCT	TTCGCCT	A	G	NM_006009.3:c.448A>G	p.(Thr150Ala)	0.00443584	0.00266657	0.00290484	0.00333575	1114
chr12:g.49579701T>A	EXON4	TTCACCT	TTCTCCT	A	T	NM_006009.3:c.448A>T	p.(Thr150Ser)	0.00104939	0.000689456	0.000760429	0.000833092	3456
chr12:g.49579700G>T	EXON4	TCACCTC	TCAACTC	C	A	NM_006009.3:c.449C>A	p.(Thr150Asn)	0.00319179	0.00159319	0.00184788	0.00221095	1655
chr12:g.49579700G>C	EXON4	TCACCTC	TCAGCTC	C	G	NM_006009.3:c.449C>G	p.(Thr150Ser)	0.00140352	0.000764079	0.000986257	0.00105129	2918
chr12:g.49579700G>A	EXON4	TCACCTC	TCATCTC	C	T	NM_006009.3:c.449C>T	p.(Thr150Ile)	0.00936403	0.00493129	0.00598799	0.0067611	185
chr12:g.49579699G>T	EXON4	CACCTCG	CACATCG	C	A	NM_006009.3:c.450C>A	p.(=)	0.001024	0.000590772	0.000807389	0.000807389	3529
chr12:g.49579699G>C	EXON4	CACCTCG	CACGTCG	C	G	NM_006009.3:c.450C>G	p.(=)	0.00191016	0.000925543	0.00124062	0.00135878	2413
chr12:g.49579699G>A	EXON4	CACCTCG	CACTTCG	C	T	NM_006009.3:c.450C>T	p.(=)	0.00649849	0.00326894	0.00397787	0.00458177	610
chr12:g.49579698A>T	EXON4	ACCTCGC	ACCACGC	T	A	NM_006009.3:c.451T>A	p.(Ser151Thr)	0.00280357	0.00204427	0.00239472	0.00241419	1553
chr12:g.49579698A>G	EXON4	ACCTCGC	ACCCCGC	T	C	NM_006009.3:c.451T>C	p.(Ser151Pro)	0.00303721	0.0015186	0.0015186	0.0020248	1771
chr12:g.49579698A>C	EXON4	ACCTCGC	ACCGCGC	T	G	NM_006009.3:c.451T>G	p.(Ser151Ala)	0.00309561	0.00216109	0.00262835	0.00262835	1468
chr12:g.49579697G>T	EXON4	CCTCGCT	CCTAGCT	C	A	NM_006009.3:c.452C>A	p.(Ser151*)	0.00312432	0.00196178	0.00228875	0.00245828	1532
chr12:g.49579697G>C	EXON4	CCTCGCT	CCTGGCT	C	G	NM_006009.3:c.452C>G	p.(Ser151Trp)	0.00555838	0.00341495	0.00377825	0.00425053	713
chr12:g.49579697G>A	EXON4	CCTCGCT	CCTTGCT	C	T	NM_006009.3:c.452C>T	p.(Ser151Leu)	0.0674635	0.0360023	0.0429049	0.0487902	58
chr12:g.49579696C>T	EXON4	CTCGCTG	CTCACTG	G	A	NM_006009.3:c.453G>A	p.(=)	0.0779224	0.0440181	0.0532822	0.0584076	42
chr12:g.49579696C>G	EXON4	CTCGCTG	CTCCCTG	G	C	NM_006009.3:c.453G>C	p.(=)	0.00539948	0.00334384	0.00364533	0.00412955	750
chr12:g.49579696C>A	EXON4	CTCGCTG	CTCTCTG	G	T	NM_006009.3:c.453G>T	p.(=)	0.00956557	0.00561875	0.00704399	0.00740944	140
chr12:g.49579695G>T	EXON4	TCGCTGC	TCGATGC	C	A	NM_006009.3:c.454C>A	p.(Leu152Met)	0.00165511	0.00102885	0.00116305	0.00128234	2510
chr12:g.49579695G>C	EXON4	TCGCTGC	TCGGTGC	C	G	NM_006009.3:c.454C>G	p.(Leu152Val)	0.00107358	0.000581525	0.000715724	0.000790278	3570
chr12:g.49579695G>A	EXON4	TCGCTGC	TCGTTGC	C	T	NM_006009.3:c.454C>T	p.(=)	0.00585999	0.00313129	0.00375755	0.00424961	715
chr12:g.49579694A>T	EXON4	CGCTGCT	CGCAGCT	T	A	NM_006009.3:c.455T>A	p.(Leu152Gln)	0.00108984	0.000408692	0.00057898	0.000692505	3838
chr12:g.49579694A>G	EXON4	CGCTGCT	CGCCGCT	T	C	NM_006009.3:c.455T>C	p.(Leu152Pro)	0.00456372	0.00299707	0.00357605	0.00371228	921
chr12:g.49579694A>C	EXON4	CGCTGCT	CGCGGCT	T	G	NM_006009.3:c.455T>G	p.(Leu152Arg)	0.00126013	0.000544922	0.000749268	0.000851441	3402
chr12:g.49579693C>T	EXON4	GCTGCTC	GCTACTC	G	A	NM_006009.3:c.456G>A	p.(=)	0.00541127	0.0029481	0.00375633	0.00403857	781
chr12:g.49579693C>G	EXON4	GCTGCTC	GCTCCTC	G	C	NM_006009.3:c.456G>C	p.(=)	0.00203211	0.00117001	0.00132395	0.00150869	2219
chr12:g.49579693C>A	EXON4	GCTGCTC	GCTTCTC	G	T	NM_006009.3:c.456G>T	p.(=)	0.00391798	0.00186277	0.00225534	0.0026787	1455
chr12:g.49579692G>T	EXON4	CTGCTCA	CTGATCA	C	A	NM_006009.3:c.457C>A	p.(Leu153Ile)	0.00115921	0.000500569	0.000748219	0.000802667	3544
chr12:g.49579692G>C	EXON4	CTGCTCA	CTGGTCA	C	G	NM_006009.3:c.457C>G	p.(Leu153Val)	0.00123298	0.000648105	0.000827256	0.000902781	3243
chr12:g.49579692G>A	EXON4	CTGCTCA	CTGTTCA	C	T	NM_006009.3:c.457C>T	p.(Leu153Phe)	0.00715023	0.00384121	0.00443135	0.00514093	454
chr12:g.49579691A>T	EXON4	TGCTCAT	TGCACAT	T	A	NM_006009.3:c.458T>A	p.(Leu153His)	0.000907175	0.000503371	0.000591876	0.000667474	3921
chr12:g.49579691A>G	EXON4	TGCTCAT	TGCCCAT	T	C	NM_006009.3:c.458T>C	p.(Leu153Pro)	0.00302023	0.0015599	0.00174797	0.00210937	1718
chr12:g.49579691A>C	EXON4	TGCTCAT	TGCGCAT	T	G	NM_006009.3:c.458T>G	p.(Leu153Arg)	0.000846328	0.000486777	0.000531029	0.000621378	4059
chr12:g.49579690G>T	EXON4	GCTCATG	GCTAATG	C	A	NM_006009.3:c.459C>A	p.(=)	0.00127763	0.000616785	0.000729373	0.000874595	3345
chr12:g.49579690G>C	EXON4	GCTCATG	GCTGATG	C	G	NM_006009.3:c.459C>G	p.(=)	0.00163008	0.000846856	0.000959444	0.00114546	2741
chr12:g.49579690G>A	EXON4	GCTCATG	GCTTATG	C	T	NM_006009.3:c.459C>T	p.(=)	0.0112784	0.00547275	0.00674058	0.00783056	127
chr12:g.49579689T>G	EXON4	CTCATGG	CTCCTGG	A	C	NM_006009.3:c.460A>C	p.(Met154Leu)	0.00214658	0.00108246	0.00129651	0.00150852	2220
chr12:g.49579689T>C	EXON4	CTCATGG	CTCGTGG	A	G	NM_006009.3:c.460A>G	p.(Met154Val)	0.00890433	0.00525331	0.00604834	0.00673532	187
chr12:g.49579689T>A	EXON4	CTCATGG	CTCTTGG	A	T	NM_006009.3:c.460A>T	p.(Met154Leu)	0.00205485	0.000947919	0.00128428	0.00142901	2326
chr12:g.49579688A>T	EXON4	TCATGGA	TCAAGGA	T	A	NM_006009.3:c.461T>A	p.(Met154Lys)	0.0015328	0.000755684	0.000884311	0.0010576	2899
chr12:g.49579688A>G	EXON4	TCATGGA	TCACGGA	T	C	NM_006009.3:c.461T>C	p.(Met154Thr)	0.012643	0.00693514	0.00831788	0.00929866	102
chr12:g.49579688A>C	EXON4	TCATGGA	TCAGGGA	T	G	NM_006009.3:c.461T>G	p.(Met154Arg)	0.00162392	0.000927186	0.00106117	0.00120409	2631
chr12:g.49579687C>T	EXON4	CATGGAA	CATAGAA	G	A	NM_006009.3:c.462G>A	p.(Met154Ile)	0.00570012	0.00290631	0.00348382	0.00403009	784
chr12:g.49579687C>G	EXON4	CATGGAA	CATCGAA	G	C	NM_006009.3:c.462G>C	p.(Met154Ile)	0.00047626	0.000232505	0.000273756	0.000327507	4529
chr12:g.49579687C>A	EXON4	CATGGAA	CATTGAA	G	T	NM_006009.3:c.462G>T	p.(Met154Ile)	0.00103502	0.000558762	0.000660014	0.000751266	3678
chr12:g.49579686C>T	EXON4	ATGGAAC	ATGAAAC	G	A	NM_006009.3:c.463G>A	p.(Glu155Lys)	0.00477682	0.00240747	0.00378588	0.00365672	943
chr12:g.49579686C>G	EXON4	ATGGAAC	ATGCAAC	G	C	NM_006009.3:c.463G>C	p.(Glu155Gln)	0.0023757	0.00125137	0.00140383	0.00167697	2048
chr12:g.49579686C>A	EXON4	ATGGAAC	ATGTAAC	G	T	NM_006009.3:c.463G>T	p.(Glu155*)	0.00161345	0.000870245	0.000921062	0.00113492	2766
chr12:g.49579685T>G	EXON4	TGGAACG	TGGCACG	A	C	NM_006009.3:c.464A>C	p.(Glu155Ala)	0.00128581	0.000668621	0.000617189	0.000857207	3386
chr12:g.49579685T>C	EXON4	TGGAACG	TGGGACG	A	G	NM_006009.3:c.464A>G	p.(Glu155Gly)	0.00221159	0.00195443	0.0015944	0.00192014	1843
chr12:g.49579685T>A	EXON4	TGGAACG	TGGTACG	A	T	NM_006009.3:c.464A>T	p.(Glu155Val)	0.000822918	0.000360027	0.000514324	0.000565756	4214
chr12:g.49579684T>G	EXON4	GGAACGT	GGACCGT	A	C	NM_006009.3:c.465A>C	p.(Glu155Asp)	0.00138958	0.000843672	0.0008933	0.00104218	2944
chr12:g.49579684T>C	EXON4	GGAACGT	GGAGCGT	A	G	NM_006009.3:c.465A>G	p.(=)	0.00372208	0.00253102	0.0026799	0.00297767	1311
chr12:g.49579684T>A	EXON4	GGAACGT	GGATCGT	A	T	NM_006009.3:c.465A>T	p.(Glu155Asp)	0.00109181	0.000843672	0.000694789	0.000876757	3342
chr12:g.49579683G>T	EXON4	GAACGTC	GAAAGTC	C	A	NM_006009.3:c.466C>A	p.(Arg156Ser)	0.00902486	0.00466539	0.00611855	0.00660293	194
chr12:g.49579683G>C	EXON4	GAACGTC	GAAGGTC	C	G	NM_006009.3:c.466C>G	p.(Arg156Gly)	0.00474187	0.00351816	0.00374761	0.00400255	798
chr12:g.49579683G>A	EXON4	GAACGTC	GAATGTC	C	T	NM_006009.3:c.466C>T	p.(Arg156Cys)	0.0852008	0.04826	0.0571319	0.0635309	28
chr12:g.49579682C>T	EXON4	AACGTCT	AACATCT	G	A	NM_006009.3:c.467G>A	p.(Arg156His)	0.0920046	0.0510329	0.0598699	0.0676358	23
chr12:g.49579682C>G	EXON4	AACGTCT	AACCTCT	G	C	NM_006009.3:c.467G>C	p.(Arg156Pro)	0.00558531	0.00420811	0.00451415	0.00476919	563
chr12:g.49579682C>A	EXON4	AACGTCT	AACTTCT	G	T	NM_006009.3:c.467G>T	p.(Arg156Leu)	0.00665647	0.00443764	0.00466718	0.00525376	432
chr12:g.49579681A>T	EXON4	ACGTCTC	ACGACTC	T	A	NM_006009.3:c.468T>A	p.(=)	0.00161706	0.00113631	0.00122372	0.0013257	2443
chr12:g.49579681A>G	EXON4	ACGTCTC	ACGCCTC	T	C	NM_006009.3:c.468T>C	p.(=)	0.00288449	0.00192299	0.00209781	0.00230176	1605
chr12:g.49579681A>C	EXON4	ACGTCTC	ACGGCTC	T	G	NM_006009.3:c.468T>G	p.(=)	0.000568157	0.000305931	0.000393339	0.000422476	4459
chr12:g.49579680G>T	EXON4	CGTCTCT	CGTATCT	C	A	NM_006009.3:c.469C>A	p.(Leu157Ile)	0.00117485	0.000605225	0.000658627	0.0008129	3516
chr12:g.49579680G>C	EXON4	CGTCTCT	CGTGTCT	C	G	NM_006009.3:c.469C>G	p.(Leu157Val)	0.00197588	0.00126385	0.00139736	0.0015457	2183
chr12:g.49579680G>A	EXON4	CGTCTCT	CGTTTCT	C	T	NM_006009.3:c.469C>T	p.(Leu157Phe)	0.00387166	0.00177117	0.0024743	0.00270571	1442
chr12:g.49579679A>T	EXON4	GTCTCTC	GTCACTC	T	A	NM_006009.3:c.470T>A	p.(Leu157His)	0.000639598	0.000313765	0.000452546	0.000468636	4393
chr12:g.49579679A>G	EXON4	GTCTCTC	GTCCCTC	T	C	NM_006009.3:c.470T>C	p.(Leu157Pro)	0.00284802	0.00153866	0.0016895	0.00202539	1770
chr12:g.49579679A>C	EXON4	GTCTCTC	GTCGCTC	T	G	NM_006009.3:c.470T>G	p.(Leu157Arg)	0.000669768	0.000356003	0.000476682	0.000500818	4345
chr12:g.49579678G>T	EXON4	TCTCTCA	TCTATCA	C	A	NM_006009.3:c.471C>A	p.(=)	0.000809018	0.000451045	0.000583495	0.000614519	4079
chr12:g.49579678G>C	EXON4	TCTCTCA	TCTGTCA	C	G	NM_006009.3:c.471C>G	p.(=)	0.00439232	0.00209772	0.00267405	0.0030547	1263
chr12:g.49579678G>A	EXON4	TCTCTCA	TCTTTCA	C	T	NM_006009.3:c.471C>T	p.(=)	0.00521208	0.00277787	0.00331125	0.00376706	893
chr12:g.49579677A>T	EXON4	CTCTCAG	CTCACAG	T	A	NM_006009.3:c.472T>A	p.(Ser158Thr)	0.000529496	0.000325129	0.000366932	0.000407186	4471
chr12:g.49579677A>G	EXON4	CTCTCAG	CTCCCAG	T	C	NM_006009.3:c.472T>C	p.(Ser158Pro)	0.00313518	0.00188111	0.00222946	0.00241525	1552
chr12:g.49579677A>C	EXON4	CTCTCAG	CTCGCAG	T	G	NM_006009.3:c.472T>G	p.(Ser158Ala)	0.000915007	0.000431957	0.000501628	0.000616197	4073
chr12:g.49579676G>T	EXON4	TCTCAGT	TCTAAGT	C	A	NM_006009.3:c.473C>A	p.(Ser158*)	0.000879912	0.000487827	0.000551655	0.000639798	4002
chr12:g.49579676G>C	EXON4	TCTCAGT	TCTGAGT	C	G	NM_006009.3:c.473C>G	p.(Ser158*)	0.00151363	0.000907267	0.000984772	0.00113522	2765
chr12:g.49579676G>A	EXON4	TCTCAGT	TCTTAGT	C	T	NM_006009.3:c.473C>T	p.(Ser158Leu)	0.00489651	0.00247561	0.00318683	0.00351965	1013
chr12:g.49579675T>G	EXON4	CTCAGTT	CTCCGTT	A	C	NM_006009.3:c.474A>C	p.(=)	0.00172895	0.000937325	0.00104903	0.00123843	2579
chr12:g.49579675T>C	EXON4	CTCAGTT	CTCGGTT	A	G	NM_006009.3:c.474A>G	p.(=)	0.00508001	0.00270027	0.00315194	0.00364408	951
chr12:g.49579675T>A	EXON4	CTCAGTT	CTCTGTT	A	T	NM_006009.3:c.474A>T	p.(=)	0.00176781	0.000961609	0.00111702	0.00128214	2511
chr12:g.49579674C>T	EXON4	TCAGTTG	TCAATTG	G	A	NM_006009.3:c.475G>A	p.(Val159Ile)	0.00815467	0.00502723	0.00560334	0.00626174	228
chr12:g.49579674C>G	EXON4	TCAGTTG	TCACTTG	G	C	NM_006009.3:c.475G>C	p.(Val159Leu)	0.00277766	0.00167346	0.00190664	0.00211925	1713
chr12:g.49579674C>A	EXON4	TCAGTTG	TCATTTG	G	T	NM_006009.3:c.475G>T	p.(Val159Phe)	0.00320974	0.00146084	0.00194093	0.00220384	1657
chr12:g.49579673A>T	EXON4	CAGTTGA	CAGATGA	T	A	NM_006009.3:c.476T>A	p.(Val159Asp)	0.00168259	0.000982146	0.00114203	0.00126892	2524
chr12:g.49579673A>G	EXON4	CAGTTGA	CAGCTGA	T	C	NM_006009.3:c.476T>C	p.(Val159Ala)	0.01123	0.00609083	0.00689025	0.00807035	122
chr12:g.49579673A>C	EXON4	CAGTTGA	CAGGTGA	T	G	NM_006009.3:c.476T>G	p.(Val159Gly)	0.00205565	0.00123339	0.00140089	0.00156331	2157
chr12:g.49579672A>T	EXON4	AGTTGAT	AGTAGAT	T	A	NM_006009.3:c.477T>A	p.(=)	0.000842841	0.00049337	0.000568746	0.000634986	4020
chr12:g.49579672A>G	EXON4	AGTTGAT	AGTCGAT	T	C	NM_006009.3:c.477T>C	p.(=)	0.00248056	0.00139788	0.00165142	0.00184329	1898
chr12:g.49579672A>C	EXON4	AGTTGAT	AGTGGAT	T	G	NM_006009.3:c.477T>G	p.(=)	0.00124028	0.000692089	0.000740056	0.000890808	3302
chr12:g.49579671C>T	EXON4	GTTGATT	GTTAATT	G	A	NM_006009.3:c.478G>A	p.(Asp160Asn)	0.0034191	0.00182555	0.00211862	0.00245442	1537
chr12:g.49579671C>G	EXON4	GTTGATT	GTTCATT	G	C	NM_006009.3:c.478G>C	p.(Asp160His)	0.00172176	0.00087309	0.00112342	0.00123942	2577
chr12:g.49579671C>A	EXON4	GTTGATT	GTTTATT	G	T	NM_006009.3:c.478G>T	p.(Asp160Tyr)	0.00265591	0.0014348	0.00159965	0.00189678	1858
chr12:g.49579670T>G	EXON4	TTGATTA	TTGCTTA	A	C	NM_006009.3:c.479A>C	p.(Asp160Ala)	0.000823414	0.000443377	0.000589545	0.000618779	4064
chr12:g.49579670T>C	EXON4	TTGATTA	TTGGTTA	A	G	NM_006009.3:c.479A>G	p.(Asp160Gly)	0.00366395	0.00209508	0.0023192	0.00269274	1446
chr12:g.49579670T>A	EXON4	TTGATTA	TTGTTTA	A	T	NM_006009.3:c.479A>T	p.(Asp160Val)	0.0018271	0.00111088	0.00120832	0.0013821	2386
chr12:g.49579669A>T	EXON4	TGATTAT	TGAATAT	T	A	NM_006009.3:c.480T>A	p.(Asp160Glu)	0.00106467	0.000598127	0.000653952	0.000772248	3638
chr12:g.49579669A>G	EXON4	TGATTAT	TGACTAT	T	C	NM_006009.3:c.480T>C	p.(=)	0.00362863	0.00193394	0.00232871	0.00263043	1467
chr12:g.49579669A>C	EXON4	TGATTAT	TGAGTAT	T	G	NM_006009.3:c.480T>G	p.(Asp160Glu)	0.000885227	0.000566227	0.000590152	0.000680535	3878
chr12:g.49579668A>T	EXON4	GATTATG	GATAATG	T	A	NM_006009.3:c.481T>A	p.(Tyr161Asn)	0.000936372	0.000510056	0.000555733	0.000667387	3922
chr12:g.49579668A>G	EXON4	GATTATG	GATCATG	T	C	NM_006009.3:c.481T>C	p.(Tyr161His)	0.00296899	0.00169765	0.00188036	0.00218233	1678
chr12:g.49579668A>C	EXON4	GATTATG	GATGATG	T	G	NM_006009.3:c.481T>G	p.(Tyr161Asp)	0.00159869	0.0010125	0.00111908	0.00124342	2571
chr12:g.49579667T>G	EXON4	ATTATGG	ATTCTGG	A	C	NM_006009.3:c.482A>C	p.(Tyr161Ser)	0.000854092	0.000526583	0.000597222	0.000659299	3943
chr12:g.49579667T>C	EXON4	ATTATGG	ATTGTGG	A	G	NM_006009.3:c.482A>G	p.(Tyr161Cys)	0.00646669	0.00358333	0.00427688	0.00477564	556
chr12:g.49579667T>A	EXON4	ATTATGG	ATTTTGG	A	T	NM_006009.3:c.482A>T	p.(Tyr161Phe)	0.00174029	0.000943996	0.00101464	0.00123297	2593
chr12:g.49579666A>T	EXON4	TTATGGC	TTAAGGC	T	A	NM_006009.3:c.483T>A	p.(Tyr161*)	0.0013714	0.000734949	0.000719795	0.000942048	3134
chr12:g.49579666A>G	EXON4	TTATGGC	TTACGGC	T	C	NM_006009.3:c.483T>C	p.(=)	0.0127366	0.00663727	0.00814505	0.00917297	103
chr12:g.49579666A>C	EXON4	TTATGGC	TTAGGGC	T	G	NM_006009.3:c.483T>G	p.(Tyr161*)	0.000894061	0.000500068	0.000530375	0.000641501	3998
chr12:g.49579665C>T	EXON4	TATGGCA	TATAGCA	G	A	NM_006009.3:c.484G>A	p.(Gly162Ser)	0.00531175	0.00293645	0.00329006	0.00384608	856
chr12:g.49579665C>G	EXON4	TATGGCA	TATCGCA	G	C	NM_006009.3:c.484G>C	p.(Gly162Arg)	0.000684147	0.000345917	0.000484284	0.000504783	4336
chr12:g.49579665C>A	EXON4	TATGGCA	TATTGCA	G	T	NM_006009.3:c.484G>T	p.(Gly162Cys)	0.00121455	0.000799453	0.000968568	0.000994191	3026
chr12:g.49579664C>T	EXON4	ATGGCAA	ATGACAA	G	A	NM_006009.3:c.485G>A	p.(Gly162Asp)	0.00922131	0.0047196	0.00601773	0.00665288	189
chr12:g.49579664C>G	EXON4	ATGGCAA	ATGCCAA	G	C	NM_006009.3:c.485G>C	p.(Gly162Ala)	0.00109413	0.000630517	0.00072324	0.000815963	3505
chr12:g.49579664C>A	EXON4	ATGGCAA	ATGTCAA	G	T	NM_006009.3:c.485G>T	p.(Gly162Val)	0.00233199	0.00111731	0.00141403	0.00162111	2089
chr12:g.49579663G>T	EXON4	TGGCAAG	TGGAAAG	C	A	NM_006009.3:c.486C>A	p.(=)	0.00322359	0.00160178	0.00204895	0.00229144	1616
chr12:g.49579663G>C	EXON4	TGGCAAG	TGGGAAG	C	G	NM_006009.3:c.486C>G	p.(=)	0.00166185	0.000941048	0.00116129	0.00125473	2556
chr12:g.49579663G>A	EXON4	TGGCAAG	TGGTAAG	C	T	NM_006009.3:c.486C>T	p.(=)	0.00442493	0.00254951	0.00290991	0.00329478	1132
chr12:g.49579662T>G	EXON4	GGCAAGA	GGCCAGA	A	C	NM_006009.3:c.487A>C	p.(Lys163Gln)	0.000958273	0.000610829	0.000678076	0.000749059	3687
chr12:g.49579662T>C	EXON4	GGCAAGA	GGCGAGA	A	G	NM_006009.3:c.487A>G	p.(Lys163Glu)	0.00337917	0.00229201	0.00249375	0.00272165	1435
chr12:g.49579662T>A	EXON4	GGCAAGA	GGCTAGA	A	T	NM_006009.3:c.487A>T	p.(Lys163*)	0.000431503	0.000240969	0.000274593	0.000315688	4536
chr12:g.49579661T>G	EXON4	GCAAGAA	GCACGAA	A	C	NM_006009.3:c.488A>C	p.(Lys163Thr)	0.000643775	0.000285584	0.000396914	0.000442091	4434
chr12:g.49579661T>C	EXON4	GCAAGAA	GCAGGAA	A	G	NM_006009.3:c.488A>G	p.(Lys163Arg)	0.00383845	0.00217819	0.00254606	0.00285423	1372
chr12:g.49579661T>A	EXON4	GCAAGAA	GCATGAA	A	T	NM_006009.3:c.488A>T	p.(Lys163Met)	0.000653456	0.000430797	0.000425956	0.000503403	4339
chr12:g.49579660C>T	EXON4	CAAGAAG	CAAAAAG	G	A	NM_006009.3:c.489G>A	p.(=)	0.00406654	0.0022697	0.00284613	0.00306079	1257
chr12:g.49579660C>G	EXON4	CAAGAAG	CAACAAG	G	C	NM_006009.3:c.489G>C	p.(Lys163Asn)	0.00185539	0.00109432	0.00135551	0.00143507	2311
chr12:g.49579660C>A	EXON4	CAAGAAG	CAATAAG	G	T	NM_006009.3:c.489G>T	p.(Lys163Asn)	0.00141856	0.000806103	0.000918687	0.00104778	2933
chr12:g.49579659T>G	EXON4	AAGAAGT	AAGCAGT	A	C	NM_006009.3:c.490A>C	p.(Lys164Gln)	0.00117089	0.000671821	0.00078699	0.000876566	3343
chr12:g.49579659T>C	EXON4	AAGAAGT	AAGGAGT	A	G	NM_006009.3:c.490A>G	p.(Lys164Glu)	0.00224196	0.00128222	0.00155095	0.00169171	2026
chr12:g.49579659T>A	EXON4	AAGAAGT	AAGTAGT	A	T	NM_006009.3:c.490A>T	p.(Lys164*)	0.00128606	0.000694855	0.000829219	0.000936711	3155
chr12:g.49579658T>G	EXON4	AGAAGTC	AGACGTC	A	C	NM_006009.3:c.491A>C	p.(Lys164Thr)	0.00158771	0.000754617	0.000881392	0.00107457	2864
chr12:g.49579658T>C	EXON4	AGAAGTC	AGAGGTC	A	G	NM_006009.3:c.491A>G	p.(Lys164Arg)	0.00307884	0.00164205	0.0020103	0.00224373	1637
chr12:g.49579658T>A	EXON4	AGAAGTC	AGATGTC	A	T	NM_006009.3:c.491A>T	p.(Lys164Met)	0.00124964	0.000772728	0.000796875	0.000939749	3143
chr12:g.49579657C>T	EXON4	GAAGTCC	GAAATCC	G	A	NM_006009.3:c.492G>A	p.(=)	0.00559264	0.00297109	0.00352037	0.00402803	786
chr12:g.49579657C>G	EXON4	GAAGTCC	GAACTCC	G	C	NM_006009.3:c.492G>C	p.(Lys164Asn)	0.00173105	0.000907139	0.00107359	0.00123726	2581
chr12:g.49579657C>A	EXON4	GAAGTCC	GAATTCC	G	T	NM_006009.3:c.492G>T	p.(Lys164Asn)	0.00181428	0.000865527	0.000998685	0.00122616	2603
chr12:g.49579656A>T	EXON4	AAGTCCA	AAGACCA	T	A	NM_006009.3:c.493T>A	p.(Ser165Thr)	0.00157777	0.000962905	0.00106732	0.00120266	2634
chr12:g.49579656A>G	EXON4	AAGTCCA	AAGCCCA	T	C	NM_006009.3:c.493T>C	p.(Ser165Pro)	0.00397343	0.00242466	0.00268569	0.00302793	1284
chr12:g.49579656A>C	EXON4	AAGTCCA	AAGGCCA	T	G	NM_006009.3:c.493T>G	p.(Ser165Ala)	0.00117173	0.000817889	0.000922301	0.000970639	3074
chr12:g.49579655G>T	EXON4	AGTCCAA	AGTACAA	C	A	NM_006009.3:c.494C>A	p.(Ser165Tyr)	0.0025085	0.001334	0.001508	0.0017835	1943
chr12:g.49579655G>C	EXON4	AGTCCAA	AGTGCAA	C	G	NM_006009.3:c.494C>G	p.(Ser165Cys)	0.00173275	0.00108025	0.00109475	0.00130258	2476
chr12:g.49579655G>A	EXON4	AGTCCAA	AGTTCAA	C	T	NM_006009.3:c.494C>T	p.(Ser165Phe)	0.0047415	0.00238525	0.00340025	0.003509	1020
chr12:g.49579654G>T	EXON4	GTCCAAG	GTCAAAG	C	A	NM_006009.3:c.495C>A	p.(=)	0.00114322	0.000774747	0.000746403	0.000888125	3309
chr12:g.49579654G>C	EXON4	GTCCAAG	GTCGAAG	C	G	NM_006009.3:c.495C>G	p.(=)	0.00133219	0.00070861	0.000821988	0.000954262	3108
chr12:g.49579654G>A	EXON4	GTCCAAG	GTCTAAG	C	T	NM_006009.3:c.495C>T	p.(=)	0.0048091	0.00271162	0.00291003	0.00347691	1040
chr12:g.49579653T>G	EXON4	TCCAAGC	TCCCAGC	A	C	NM_006009.3:c.496A>C	p.(Lys166Gln)	0.00222665	0.00144128	0.001588	0.00175198	1969
chr12:g.49579653T>C	EXON4	TCCAAGC	TCCGAGC	A	G	NM_006009.3:c.496A>G	p.(Lys166Glu)	0.00324504	0.00194185	0.00245104	0.00254598	1500
chr12:g.49579653T>A	EXON4	TCCAAGC	TCCTAGC	A	T	NM_006009.3:c.496A>T	p.(Lys166*)	0.000604131	0.000371109	0.000431522	0.000468921	4392
chr12:g.49579652T>G	EXON4	CCAAGCT	CCACGCT	A	C	NM_006009.3:c.497A>C	p.(Lys166Thr)	0.00110436	0.000654437	0.000736241	0.00083168	3464
chr12:g.49579652T>C	EXON4	CCAAGCT	CCAGGCT	A	G	NM_006009.3:c.497A>G	p.(Lys166Arg)	0.00684432	0.00444472	0.00494236	0.00541047	394
chr12:g.49579652T>A	EXON4	CCAAGCT	CCATGCT	A	T	NM_006009.3:c.497A>T	p.(Lys166Met)	0.000818046	0.000497645	0.000661254	0.000658982	3944
chr12:g.49579651C>T	EXON4	CAAGCTG	CAAACTG	G	A	NM_006009.3:c.498G>A	p.(=)	0.00578003	0.00291477	0.00354599	0.00408026	768
chr12:g.49579651C>G	EXON4	CAAGCTG	CAACCTG	G	C	NM_006009.3:c.498G>C	p.(Lys166Asn)	0.00192461	0.0010211	0.00125007	0.00139859	2367
chr12:g.49579651C>A	EXON4	CAAGCTG	CAATCTG	G	T	NM_006009.3:c.498G>T	p.(Lys166Asn)	0.00110155	0.000606469	0.000730239	0.000812751	3518
chr12:g.49579650G>T	EXON4	AAGCTGG	AAGATGG	C	A	NM_006009.3:c.499C>A	p.(Leu167Met)	0.00167303	0.000803982	0.000966637	0.00114788	2737
chr12:g.49579650G>C	EXON4	AAGCTGG	AAGGTGG	C	G	NM_006009.3:c.499C>G	p.(Leu167Val)	0.00278373	0.00147319	0.00160796	0.00195496	1812
chr12:g.49579650G>A	EXON4	AAGCTGG	AAGTTGG	C	T	NM_006009.3:c.499C>T	p.(=)	0.00487036	0.0028395	0.00299286	0.00356757	988
chr12:g.49579649A>T	EXON4	AGCTGGA	AGCAGGA	T	A	NM_006009.3:c.500T>A	p.(Leu167Gln)	0.000845778	0.000547969	0.000615473	0.00066974	3912
chr12:g.49579649A>G	EXON4	AGCTGGA	AGCCGGA	T	C	NM_006009.3:c.500T>C	p.(Leu167Pro)	0.00354592	0.00215614	0.00247777	0.00272661	1434
chr12:g.49579649A>C	EXON4	AGCTGGA	AGCGGGA	T	G	NM_006009.3:c.500T>G	p.(Leu167Arg)	0.000897399	0.00050032	0.000532086	0.000643268	3994
chr12:g.49579648C>T	EXON4	GCTGGAG	GCTAGAG	G	A	NM_006009.3:c.501G>A	p.(=)	0.00545051	0.00261202	0.00313531	0.00373261	911
chr12:g.49579648C>G	EXON4	GCTGGAG	GCTCGAG	G	C	NM_006009.3:c.501G>C	p.(=)	0.000375973	0.000222066	0.000246251	0.00028143	4546
chr12:g.49579648C>A	EXON4	GCTGGAG	GCTTGAG	G	T	NM_006009.3:c.501G>T	p.(=)	0.000732158	0.000437536	0.000499099	0.000556264	4236
chr12:g.49579647C>T	EXON4	CTGGAGT	CTGAAGT	G	A	NM_006009.3:c.502G>A	p.(Glu168Lys)	0.00365793	0.00182652	0.00257618	0.00268688	1449
chr12:g.49579647C>G	EXON4	CTGGAGT	CTGCAGT	G	C	NM_006009.3:c.502G>C	p.(Glu168Gln)	0.0033063	0.00163117	0.00194618	0.00229455	1612
chr12:g.49579647C>A	EXON4	CTGGAGT	CTGTAGT	G	T	NM_006009.3:c.502G>T	p.(Glu168*)	0.00198769	0.00111105	0.00131861	0.00147245	2262
chr12:g.49579646T>G	EXON4	TGGAGTT	TGGCGTT	A	C	NM_006009.3:c.503A>C	p.(Glu168Ala)	0.0013843	0.000750641	0.000887121	0.00100735	3006
chr12:g.49579646T>C	EXON4	TGGAGTT	TGGGGTT	A	G	NM_006009.3:c.503A>G	p.(Glu168Gly)	0.00334376	0.00215931	0.00234453	0.00261587	1472
chr12:g.49579646T>A	EXON4	TGGAGTT	TGGTGTT	A	T	NM_006009.3:c.503A>T	p.(Glu168Val)	0.00118933	0.000701898	0.000843253	0.000911493	3222
chr12:g.49579645C>T	EXON4	GGAGTTC	GGAATTC	G	A	NM_006009.3:c.504G>A	p.(=)	0.0057112	0.00287046	0.00365177	0.00407781	769
chr12:g.49579645C>G	EXON4	GGAGTTC	GGACTTC	G	C	NM_006009.3:c.504G>C	p.(Glu168Asp)	0.00142249	0.000768571	0.000972391	0.00105448	2912
chr12:g.49579645C>A	EXON4	GGAGTTC	GGATTTC	G	T	NM_006009.3:c.504G>T	p.(Glu168Asp)	0.0016433	0.000866235	0.000976637	0.00116206	2707
chr12:g.49579644A>T	EXON4	GAGTTCT	GAGATCT	T	A	NM_006009.3:c.505T>A	p.(Phe169Ile)	0.00174775	0.00099451	0.00123578	0.00132601	2442
chr12:g.49579644A>G	EXON4	GAGTTCT	GAGCTCT	T	C	NM_006009.3:c.505T>C	p.(Phe169Leu)	0.00414281	0.00230679	0.00267164	0.00304041	1276
chr12:g.49579644A>C	EXON4	GAGTTCT	GAGGTCT	T	G	NM_006009.3:c.505T>G	p.(Phe169Val)	0.00144174	0.000865047	0.00098274	0.00109651	2827
chr12:g.49579643A>T	EXON4	AGTTCTC	AGTACTC	T	A	NM_006009.3:c.506T>A	p.(Phe169Tyr)	0.000907054	0.000502705	0.000628381	0.00067938	3883
chr12:g.49579643A>G	EXON4	AGTTCTC	AGTCCTC	T	C	NM_006009.3:c.506T>C	p.(Phe169Ser)	0.00207639	0.00148079	0.00155183	0.001703	2017
chr12:g.49579643A>C	EXON4	AGTTCTC	AGTGCTC	T	G	NM_006009.3:c.506T>G	p.(Phe169Cys)	0.00083602	0.000415278	0.000513633	0.00058831	4162
chr12:g.49579642G>T	EXON4	GTTCTCT	GTTATCT	C	A	NM_006009.3:c.507C>A	p.(Phe169Leu)	0.00332625	0.00160595	0.001897	0.0022764	1624
chr12:g.49579642G>C	EXON4	GTTCTCT	GTTGTCT	C	G	NM_006009.3:c.507C>G	p.(Phe169Leu)	0.00235956	0.00125774	0.0015176	0.00171163	2006
chr12:g.49579642G>A	EXON4	GTTCTCT	GTTTTCT	C	T	NM_006009.3:c.507C>T	p.(=)	0.00537917	0.00285849	0.00372644	0.00398803	803
chr12:g.49579641A>T	EXON4	TTCTCTA	TTCACTA	T	A	NM_006009.3:c.508T>A	p.(Ser170Thr)	0.000509028	0.000316423	0.000309544	0.000378332	4508
chr12:g.49579641A>G	EXON4	TTCTCTA	TTCCCTA	T	C	NM_006009.3:c.508T>C	p.(Ser170Pro)	0.00345658	0.00209114	0.00224592	0.00259788	1479
chr12:g.49579641A>C	EXON4	TTCTCTA	TTCGCTA	T	G	NM_006009.3:c.508T>G	p.(Ser170Ala)	0.000729149	0.000416165	0.000474635	0.000539983	4268
chr12:g.49579640G>T	EXON4	TCTCTAT	TCTATAT	C	A	NM_006009.3:c.509C>A	p.(Ser170Tyr)	0.00595972	0.00490388	0.00523796	0.00536719	401
chr12:g.49579640G>C	EXON4	TCTCTAT	TCTGTAT	C	G	NM_006009.3:c.509C>G	p.(Ser170Cys)	0.00498224	0.00261073	0.00324176	0.00361158	963
chr12:g.49579640G>A	EXON4	TCTCTAT	TCTTTAT	C	T	NM_006009.3:c.509C>T	p.(Ser170Phe)	0.00524621	0.00286644	0.00355933	0.00389066	840
chr12:g.49579639A>T	EXON4	CTCTATT	CTCAATT	T	A	NM_006009.3:c.510T>A	p.(=)	0.000612261	0.000368314	0.00040658	0.000462385	4403
chr12:g.49579639A>G	EXON4	CTCTATT	CTCCATT	T	C	NM_006009.3:c.510T>C	p.(=)	0.00471633	0.00275039	0.00318089	0.0035492	1002
chr12:g.49579639A>C	EXON4	CTCTATT	CTCGATT	T	G	NM_006009.3:c.510T>G	p.(=)	0.000530946	0.000282214	0.000344397	0.000385852	4504
chr12:g.49579638T>G	EXON4	TCTATTT	TCTCTTT	A	C	NM_006009.3:c.511A>C	p.(Ile171Leu)	0.00150974	0.000852935	0.000982928	0.0011152	2798
chr12:g.49579638T>C	EXON4	TCTATTT	TCTGTTT	A	G	NM_006009.3:c.511A>G	p.(Ile171Val)	0.0145273	0.00759203	0.00867759	0.0102656	91
chr12:g.49579638T>A	EXON4	TCTATTT	TCTTTTT	A	T	NM_006009.3:c.511A>T	p.(Ile171Phe)	0.000980647	0.000606633	0.000647683	0.000744988	3703
chr12:g.49579637A>T	EXON4	CTATTTA	CTAATTA	T	A	NM_006009.3:c.512T>A	p.(Ile171Asn)	0.000685247	0.000424773	0.000496904	0.000535641	4280
chr12:g.49579637A>G	EXON4	CTATTTA	CTACTTA	T	C	NM_006009.3:c.512T>C	p.(Ile171Thr)	0.00520948	0.00273698	0.00322587	0.00372411	918
chr12:g.49579637A>C	EXON4	CTATTTA	CTAGTTA	T	G	NM_006009.3:c.512T>G	p.(Ile171Ser)	0.000677233	0.000416759	0.000404737	0.000499576	4347
chr12:g.49579636A>T	EXON4	TATTTAC	TATATAC	T	A	NM_006009.3:c.513T>A	p.(=)	0.000965861	0.000558216	0.000661045	0.000728374	3739
chr12:g.49579636A>G	EXON4	TATTTAC	TATCTAC	T	C	NM_006009.3:c.513T>C	p.(=)	0.00171504	0.000855686	0.00106134	0.00121069	2626
chr12:g.49579636A>C	EXON4	TATTTAC	TATGTAC	T	G	NM_006009.3:c.513T>G	p.(Ile171Met)	0.00127068	0.000719805	0.000796927	0.000929136	3172
chr12:g.49579635A>T	EXON4	ATTTACC	ATTAACC	T	A	NM_006009.3:c.514T>A	p.(Tyr172Asn)	0.000754039	0.00047052	0.000464488	0.000563016	4226
chr12:g.49579635A>G	EXON4	ATTTACC	ATTCACC	T	C	NM_006009.3:c.514T>C	p.(Tyr172His)	0.00301012	0.00174937	0.00179763	0.00218571	1673
chr12:g.49579635A>C	EXON4	ATTTACC	ATTGACC	T	G	NM_006009.3:c.514T>G	p.(Tyr172Asp)	0.000621328	0.000343842	0.000398132	0.000454434	4419
chr12:g.49579634T>G	EXON4	TTTACCC	TTTCCCC	A	C	NM_006009.3:c.515A>C	p.(Tyr172Ser)	0.00105489	0.000616708	0.000681625	0.000784409	3591
chr12:g.49579634T>C	EXON4	TTTACCC	TTTGCCC	A	G	NM_006009.3:c.515A>G	p.(Tyr172Cys)	0.00416278	0.00241814	0.00259667	0.0030592	1259
chr12:g.49579634T>A	EXON4	TTTACCC	TTTTCCC	A	T	NM_006009.3:c.515A>T	p.(Tyr172Phe)	0.00100621	0.000616708	0.000689739	0.000770885	3640
chr12:g.49579633G>T	EXON4	TTACCCG	TTAACCG	C	A	NM_006009.3:c.516C>A	p.(Tyr172*)	0.00304826	0.00177815	0.00211685	0.00231442	1597
chr12:g.49579633G>C	EXON4	TTACCCG	TTAGCCG	C	G	NM_006009.3:c.516C>G	p.(Tyr172*)	0.00397968	0.00296359	0.00296359	0.00330229	1127
chr12:g.49579633G>A	EXON4	TTACCCG	TTATCCG	C	T	NM_006009.3:c.516C>T	p.(=)	0.00855207	0.00465707	0.00541914	0.00620943	238
chr12:g.49579632G>T	EXON4	TACCCGG	TACACGG	C	A	NM_006009.3:c.517C>A	p.(Pro173Thr)	0.00276318	0.00168486	0.00155007	0.00199937	1782
chr12:g.49579632G>C	EXON4	TACCCGG	TACGCGG	C	G	NM_006009.3:c.517C>G	p.(Pro173Ala)	0.00283057	0.0012805	0.00175226	0.00195444	1813
chr12:g.49579632G>A	EXON4	TACCCGG	TACTCGG	C	T	NM_006009.3:c.517C>T	p.(Pro173Ser)	0.00667206	0.00431325	0.00485241	0.00527924	424
chr12:g.49579631G>T	EXON4	ACCCGGC	ACCAGGC	C	A	NM_006009.3:c.518C>A	p.(Pro173Gln)	0.00506606	0.00205381	0.00312635	0.00341541	1080
chr12:g.49579631G>C	EXON4	ACCCGGC	ACCGGGC	C	G	NM_006009.3:c.518C>G	p.(Pro173Arg)	0.00335456	0.00182561	0.00216791	0.00244936	1539
chr12:g.49579631G>A	EXON4	ACCCGGC	ACCTGGC	C	T	NM_006009.3:c.518C>T	p.(Pro173Leu)	0.0915999	0.0480135	0.06077	0.0667945	24
chr12:g.49579630C>T	EXON4	CCCGGCG	CCCAGCG	G	A	NM_006009.3:c.519G>A	p.(=)	0.057608	0.0326654	0.0387184	0.0429973	65
chr12:g.49579630C>G	EXON4	CCCGGCG	CCCCGCG	G	C	NM_006009.3:c.519G>C	p.(=)	0.00396577	0.00281778	0.00271342	0.00316566	1203
chr12:g.49579630C>A	EXON4	CCCGGCG	CCCTGCG	G	T	NM_006009.3:c.519G>T	p.(=)	0.00417449	0.00292215	0.00396577	0.00368747	929
chr12:g.49579629C>T	EXON4	CCGGCGC	CCGACGC	G	A	NM_006009.3:c.520G>A	p.(Ala174Thr)	0.00481363	0.00259195	0.00296223	0.00345594	1050
chr12:g.49579629C>G	EXON4	CCGGCGC	CCGCCGC	G	C	NM_006009.3:c.520G>C	p.(Ala174Pro)	0.0018514	0.00123426	0.00123426	0.00143997	2306
chr12:g.49579629C>A	EXON4	CCGGCGC	CCGTCGC	G	T	NM_006009.3:c.520G>T	p.(Ala174Ser)	0.00172797	0.000863984	0.00111084	0.00123426	2589
chr12:g.49579628G>T	EXON4	CGGCGCC	CGGAGCC	C	A	NM_006009.3:c.521C>A	p.(Ala174Glu)	0.0028998	0.001611	0.0019332	0.002148	1698
chr12:g.49579628G>C	EXON4	CGGCGCC	CGGGGCC	C	G	NM_006009.3:c.521C>G	p.(Ala174Gly)	0.003222	0.0020406	0.0023628	0.0025418	1504
chr12:g.49579628G>A	EXON4	CGGCGCC	CGGTGCC	C	T	NM_006009.3:c.521C>T	p.(Ala174Val)	0.0528407	0.028998	0.0367307	0.0395231	68
chr12:g.49579627C>T	EXON4	GGCGCCC	GGCACCC	G	A	NM_006009.3:c.522G>A	p.(=)	0.0620912	0.0353244	0.0449973	0.047471	60
chr12:g.49579627C>G	EXON4	GGCGCCC	GGCCCCC	G	C	NM_006009.3:c.522G>C	p.(=)	0.00225201	0.00154424	0.00163003	0.00180876	1925
chr12:g.49579627C>A	EXON4	GGCGCCC	GGCTCCC	G	T	NM_006009.3:c.522G>T	p.(=)	0.00493298	0.00291689	0.00353887	0.00379625	875
chr12:g.49579626G>T	EXON4	GCGCCCC	GCGACCC	C	A	NM_006009.3:c.523C>A	p.(Pro175Thr)	0.00291272	0.0020285	0.00213253	0.00235792	1578
chr12:g.49579626G>C	EXON4	GCGCCCC	GCGGCCC	C	G	NM_006009.3:c.523C>G	p.(Pro175Ala)	0.00104026	0.000520129	0.000624155	0.000728181	3740
chr12:g.49579626G>A	EXON4	GCGCCCC	GCGTCCC	C	T	NM_006009.3:c.523C>T	p.(Pro175Ser)	0.00920628	0.00478519	0.00587746	0.00662298	192
chr12:g.49579625G>T	EXON4	CGCCCCA	CGCACCA	C	A	NM_006009.3:c.524C>A	p.(Pro175His)	0.00145821	0.00116657	0.00120823	0.00127767	2517
chr12:g.49579625G>C	EXON4	CGCCCCA	CGCGCCA	C	G	NM_006009.3:c.524C>G	p.(Pro175Arg)	0.00187484	0.00112491	0.00137488	0.00145821	2279
chr12:g.49579625G>A	EXON4	CGCCCCA	CGCTCCA	C	T	NM_006009.3:c.524C>T	p.(Pro175Leu)	0.00616615	0.00349971	0.00416632	0.00461073	599
chr12:g.49579624G>T	EXON4	GCCCCAG	GCCACAG	C	A	NM_006009.3:c.525C>A	p.(=)	0.00149191	0.000959502	0.00101216	0.00115452	2725
chr12:g.49579624G>C	EXON4	GCCCCAG	GCCGCAG	C	G	NM_006009.3:c.525C>G	p.(=)	0.00208867	0.00108822	0.00122863	0.00146851	2271
chr12:g.49579624G>A	EXON4	GCCCCAG	GCCTCAG	C	T	NM_006009.3:c.525C>T	p.(=)	0.00621336	0.00331145	0.00387896	0.00446792	642
chr12:g.49579623G>T	EXON4	CCCCAGG	CCCAAGG	C	A	NM_006009.3:c.526C>A	p.(Gln176Lys)	0.00184707	0.000977257	0.00116145	0.00132859	2439
[truncated: 2,552 more rows]
